# Supplementary material for: Synthesis of functionalized quinolines from the cascade reactions of N-aryl amidines with two CF3-ynones via C–H/N–H/C–N/C–C bond cleavage
Source: Royal Society of Chemistry journal article supplement (doi:10.1039/d3qo02070c), 2024-01-01
Supplement: d3qo02070c1.pdf [file d3qo02070c1.pdf]

## Supporting Information

### **Synthesis of functionalized quinolines from the cascade reactions of *N*-aryl amidines with two CF<sub>3</sub>-ynones via C–H/N–H/C–N/C–C bond cleavage**

Hao Li, Shengnan Yan, Yuanshuang Xu, Chunhua Ma, Xinying Zhang\*, Xuesen Fan\*

*State Key Laboratory of Antiviral Drugs, Pingyuan Laboratory, Collaborative Innovation Center of Henan*

*Province for Green Manufacturing of Fine Chemicals, Key Laboratory of Green Chemical Media and*

*Reactions, Ministry of Education, School of Chemistry and Chemical Engineering, Henan Normal University,*

*Xinxiang, Henan 453007, China*

*E-mail: xinyingzhang@htu.cn; xuesen.fan@htu.cn*

## Table of Contents

|             |                                                |           |
|-------------|------------------------------------------------|-----------|
| <b>I</b>    | General experimental information               | S3        |
| <b>II</b>   | Experimental procedures and spectroscopic data | S4-S26    |
| <b>III</b>  | Mechanistic studies                            | S27-S30   |
| <b>IV</b>   | NMR spectra of <b>3aa-3ra</b> , <b>3ab-3as</b> | S31-S100  |
| <b>V</b>    | NMR spectra of <b>4a-4l</b>                    | S101-S124 |
| <b>VI</b>   | X-ray crystal structure and data of <b>3aa</b> | S125-S126 |
| <b>VII</b>  | Cell antiproliferative activity assay          | S127      |
| <b>VIII</b> | References                                     | S128      |

## I. General experimental information

All reagents were purchased from commercial sources and were used without further purification. All solvents were purified and dried according to standard methods prior to use. *N*-Aryl amidine **1**<sup>[1]</sup>, trifluoromethyl ynones **2**<sup>[2-3]</sup> and [RhCp\*Cl<sub>2</sub>]<sub>2</sub><sup>[4]</sup> were prepared based on literature procedures. Melting points were recorded with a micro melting point apparatus and uncorrected. The <sup>1</sup>H NMR spectra were recorded at 400 MHz or 600 MHz. The <sup>13</sup>C NMR spectra were recorded at 100 MHz or 150 MHz. The <sup>19</sup>F NMR spectra were recorded at 376 MHz or 565 MHz. Chemical shifts were expressed in parts per million ( $\delta$ ), and were reported as s (singlet), d (doublet), t (triplet), dd (doublet of doublets), m (multiplet), etc. The coupling constants *J* were given in Hz. High resolution mass spectra (HRMS) were obtained *via* ESI mode by using a MicrOTOF mass spectrometer. All reactions were monitored by thin layer chromatography (TLC) using silica gel plates (silica gel 60 F254 0.25 mm), and components were visualized by observation under UV light (254 and 365 nm).

## II. Experimental procedures and spectroscopic data

### 1. Typical procedure for the synthesis of 3aa and spectroscopic data of 3aa-3ra, 3ab-3as

To a reaction tube equipped with a stir bar were added *N*-phenylpivalimidamide (**1a**, 35.3 mg, 0.2 mmol), [RhCp\*Cl<sub>2</sub>]<sub>2</sub> (3.7 mg, 0.006 mmol), Cu(OAc)<sub>2</sub> · H<sub>2</sub>O (40.0 mg, 0.2 mmol), PivOH (20.4 mg, 0.2 mmol), 1,1,1-trifluoro-4-phenylbut-3-yn-2-one (**2a**, 99.1 mg, 0.5 mmol) and MeOH (2 mL). The tube was then sealed, and the mixture was stirred at 70 °C (oil bath) under air for 12 h. Upon completion, it was cooled to room temperature, filtered through a pad of celite and concentrated under reduced pressure. The residue was purified by silica gel column chromatography using petroleum ether/ethyl acetate (100:1) as eluent to afford **3aa**. Other products **3ba-3ra**, **3ab-3as** were obtained in a similar manner.

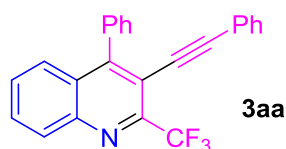

#### 4-Phenyl-3-(phenylethynyl)-2-(trifluoromethyl)quinoline (**3aa**)

Eluent: petroleum ether/ethyl acetate (100:1). White solid (48.7 mg, 65%), mp 142.2-142.8 °C. <sup>1</sup>H NMR (600 MHz, CDCl<sub>3</sub>): δ 8.25 (d, *J* = 8.4 Hz, 1H), 7.80-7.77 (m, 1H), 7.69 (d, *J* = 8.4 Hz, 1H), 7.61-7.57 (m, 4H), 7.50-7.49 (m, 2H), 7.29-7.25 (m, 3H), 7.21-7.19 (m, 2H). <sup>13</sup>C{<sup>1</sup>H} NMR (150 MHz, CDCl<sub>3</sub>): δ 153.4, 147.2 (q, <sup>2</sup>*J*<sub>C-F</sub> = 33.5 Hz), 145.1, 135.8, 131.5, 130.8, 130.5, 130.0, 129.1, 128.93, 128.85, 128.4, 128.3, 127.5, 126.4, 122.6, 121.6 (q, <sup>1</sup>*J*<sub>C-F</sub> = 274.1 Hz), 113.7, 100.0, 83.3. <sup>19</sup>F NMR (565 MHz, CDCl<sub>3</sub>): δ -66.14 (s). HRMS (ESI) *m/z*: [M+H]<sup>+</sup> Calcd for C<sub>24</sub>H<sub>15</sub>F<sub>3</sub>N 374.1151; Found 374.1141.

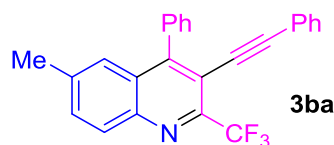

#### 6-Methyl-4-phenyl-3-(phenylethynyl)-2-(trifluoromethyl)quinoline (**3ba**)

Eluent: petroleum ether/ethyl acetate (100:1). White solid (44.4 mg, 57%), mp 146.6-147.2 °C. <sup>1</sup>H NMR (600 MHz, CDCl<sub>3</sub>): δ 8.14 (d, *J* = 9.0 Hz, 1H), 7.63-7.57 (m, 4H), 7.49-7.48 (m, 2H), 7.41 (s, 1H), 7.29-7.25 (m,



3H), 7.19-7.18 (m, 2H), 2.46 (s, 3H).  $^{13}\text{C}\{^1\text{H}\}$  NMR (150 MHz,  $\text{CDCl}_3$ ):  $\delta$  152.7, 146.3 (q,  $^2J_{\text{C-F}} = 33.5$  Hz), 143.7, 139.6, 136.0, 133.1, 131.5, 130.1, 130.0, 128.9, 128.7, 128.35, 128.31, 127.5, 125.1, 122.6, 121.6 (q,  $^1J_{\text{C-F}} = 275.6$  Hz), 113.6, 99.8, 83.5, 22.0.  $^{19}\text{F}$  NMR (565 MHz,  $\text{CDCl}_3$ ):  $\delta$  -66.01 (s). HRMS (ESI) m/z:  $[\text{M}+\text{H}]^+$  Calcd for  $\text{C}_{25}\text{H}_{17}\text{F}_3\text{N}$  388.1308; Found 388.1290.

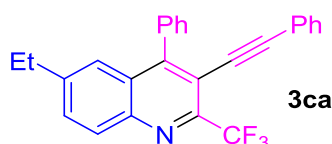

### 6-Ethyl-4-phenyl-3-(phenylethynyl)-2-(trifluoromethyl)quinoline (3ca)

Eluent: petroleum ether/ethyl acetate (100:1). White solid (48.3 mg, 60%), mp 112.6-113.3 °C.  $^1\text{H}$  NMR (600 MHz,  $\text{CDCl}_3$ ):  $\delta$  8.17 (d,  $J = 9.0$  Hz, 1H), 7.67 (dd,  $J_1 = 8.4$  Hz,  $J_2 = 1.8$  Hz, 1H), 7.62-7.58 (m, 3H), 7.50-7.49 (m, 2H), 7.43 (d,  $J = 1.2$  Hz, 1H), 7.30-7.25 (m, 3H), 7.20-7.18 (m, 2H), 2.75 (q,  $J = 7.8$  Hz, 2H), 1.24 (t,  $J = 7.8$  Hz, 3H).  $^{13}\text{C}\{^1\text{H}\}$  NMR (150 MHz,  $\text{CDCl}_3$ ):  $\delta$  152.8, 146.4 (q,  $^2J_{\text{C-F}} = 30.9$  Hz), 145.7, 143.9, 136.1, 132.0, 131.5, 130.3, 130.0, 128.8, 128.7, 128.33, 128.30, 127.5, 123.9, 122.6, 121.7 (q,  $^1J_{\text{C-F}} = 273.9$  Hz), 113.6, 99.8, 83.5, 29.2, 15.4.  $^{19}\text{F}$  NMR (565 MHz,  $\text{CDCl}_3$ ):  $\delta$  -66.00 (s). HRMS (ESI) m/z:  $[\text{M}+\text{H}]^+$  Calcd for  $\text{C}_{26}\text{H}_{19}\text{F}_3\text{N}$  402.1464; Found 402.1469.

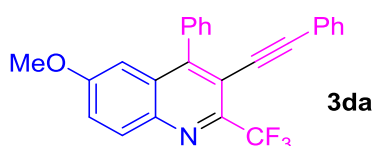

### 6-Methoxy-4-phenyl-3-(phenylethynyl)-2-(trifluoromethyl)quinoline (3da)

Eluent: petroleum ether/ethyl acetate (50:1). White solid (47.8 mg, 59%), mp 134.4-135.1 °C.  $^1\text{H}$  NMR (400 MHz,  $\text{CDCl}_3$ ):  $\delta$  8.14 (d,  $J = 9.2$  Hz, 1H), 7.62-7.56 (m, 3H), 7.51-7.49 (m, 2H), 7.43 (dd,  $J_1 = 9.2$  Hz,  $J_2 = 2.8$  Hz, 1H), 7.30-7.24 (m, 3H), 7.20-7.17 (m, 2H), 6.89 (d,  $J = 2.8$  Hz, 1H), 3.75 (s, 3H).  $^{13}\text{C}\{^1\text{H}\}$  NMR (150 MHz,  $\text{CDCl}_3$ ):  $\delta$  159.7, 151.7, 144.9 (q,  $^2J_{\text{C-F}} = 32.1$  Hz), 141.2, 136.2, 131.9, 131.5, 129.8, 128.9, 128.8, 128.5, 128.3, 123.4, 122.6, 121.8 (q,  $^1J_{\text{C-F}} = 274.8$  Hz), 114.0, 104.0, 100.0, 83.5, 55.6.  $^{19}\text{F}$  NMR (565 MHz,  $\text{CDCl}_3$ ):  $\delta$  -65.82 (s). HRMS (ESI) m/z:  $[\text{M}+\text{H}]^+$  Calcd for  $\text{C}_{25}\text{H}_{17}\text{F}_3\text{NO}$  404.1257; Found 404.1240.

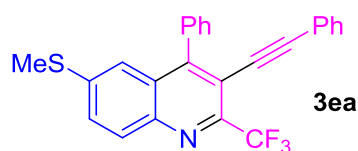

### 6-(Methylthio)-4-phenyl-3-(phenylethynyl)-2-(trifluoromethyl)quinoline (3ea)

Eluent: petroleum ether/ethyl acetate (50:1). White solid (38.7 mg, 46%), mp 132.7-133.6 °C.  $^1\text{H}$  NMR (600 MHz,  $\text{CDCl}_3$ ):  $\delta$  8.12 (d,  $J = 9.0$  Hz, 1H), 7.64 (dd,  $J_1 = 9.0$  Hz,  $J_2 = 2.4$  Hz, 1H), 7.61-7.57 (m, 3H), 7.50-7.49 (m, 2H), 7.34 (d,  $J = 1.8$  Hz, 1H), 7.31-7.25 (m, 3H), 7.19 (d,  $J = 6.6$  Hz, 2H), 2.41 (s, 3H).  $^{13}\text{C}\{^1\text{H}\}$  NMR (150 MHz,  $\text{CDCl}_3$ ):  $\delta$  151.7, 146.2 (q,  $^2J_{\text{C-F}} = 33.2$  Hz), 143.2, 141.3, 135.7, 131.5, 130.4, 129.9, 129.7, 128.95, 128.92, 128.4, 128.3, 127.9, 122.5, 121.6 (q,  $^1J_{\text{C-F}} = 274.7$  Hz), 120.3, 114.3, 100.2, 83.3, 15.2.  $^{19}\text{F}$  NMR (565 MHz,  $\text{CDCl}_3$ ):  $\delta$  -65.98 (s). HRMS (ESI)  $m/z$ :  $[\text{M}+\text{H}]^+$  Calcd for  $\text{C}_{25}\text{H}_{17}\text{F}_3\text{NS}$  420.1028; Found 420.1042.

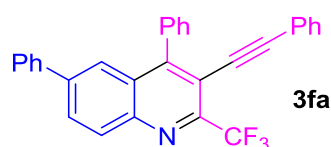

### 4,6-Diphenyl-3-(phenylethynyl)-2-(trifluoromethyl)quinoline (3fa)

Eluent: petroleum ether/ethyl acetate (100:1). White solid (56.6 mg, 63%), mp 201.4-202.0 °C.  $^1\text{H}$  NMR (400 MHz,  $\text{CDCl}_3$ ):  $\delta$  8.32 (d,  $J = 8.8$  Hz, 1H), 8.06-8.03 (m, 1H), 7.84 (s, 1H), 7.61-7.53 (m, 7H), 7.46-7.36 (m, 3H), 7.29-7.20 (m, 5H).  $^{13}\text{C}\{^1\text{H}\}$  NMR (150 MHz,  $\text{CDCl}_3$ ):  $\delta$  153.5, 147.1 (q,  $^2J_{\text{C-F}} = 33.6$  Hz), 144.4, 142.0, 139.9, 135.8, 131.6, 130.9, 130.6, 130.0, 129.1, 129.0, 128.9, 128.4, 128.3, 128.2, 127.6, 123.9, 122.5, 121.6 (q,  $^1J_{\text{C-F}} = 276.5$  Hz), 114.1, 100.2, 83.4.  $^{19}\text{F}$  NMR (565 MHz,  $\text{CDCl}_3$ ):  $\delta$  -66.06 (s). HRMS (ESI)  $m/z$ :  $[\text{M}+\text{H}]^+$  Calcd for  $\text{C}_{30}\text{H}_{19}\text{F}_3\text{N}$  450.1464; Found 450.1460.

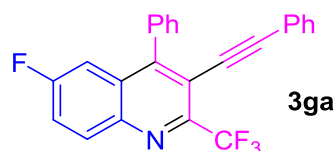

### 6-Fluoro-4-phenyl-3-(phenylethynyl)-2-(trifluoromethyl)quinoline (3ga)

Eluent: petroleum ether/ethyl acetate (100:1). White solid (34.2 mg, 44%), mp 146.5-147.4 °C.  $^1\text{H}$  NMR (600 MHz,  $\text{CDCl}_3$ ):  $\delta$  8.26 (dd,  $J_1 = 9.0$  Hz,  $J_2 = 5.4$  Hz, 1H), 7.62-7.58 (m, 3H), 7.57-7.53 (m, 1H), 7.49-7.47 (m

2H), 7.32-7.26 (m, 4H), 7.21-7.19 (m, 2H).  $^{13}\text{C}\{^1\text{H}\}$  NMR (150 MHz,  $\text{CDCl}_3$ ):  $\delta$  162.1 (d,  $^1J_{\text{C-F}} = 250.2$  Hz), 152.7 (d,  $^4J_{\text{C-F}} = 5.4$  Hz), 146.7 (qd,  $^2J_{\text{C-F}} = 32.7$  Hz,  $^6J_{\text{C-F}} = 2.4$  Hz), 142.1, 135.4, 133.2 (d,  $^3J_{\text{C-F}} = 9.0$  Hz), 131.6, 129.8, 129.1, 128.7 (d,  $^3J_{\text{C-F}} = 9.5$  Hz), 128.6, 128.3, 122.3, 121.5 (q,  $^1J_{\text{C-F}} = 274.7$  Hz), 121.0 (d,  $^2J_{\text{C-F}} = 26.4$  Hz), 114.5, 109.9 (d,  $^2J_{\text{C-F}} = 24.6$  Hz), 100.7, 83.1.  $^{19}\text{F}$  NMR (565 MHz,  $\text{CDCl}_3$ ):  $\delta$  -66.19 (s), -108.05 – -108.09 (m). HRMS (ESI)  $m/z$ :  $[\text{M}+\text{H}]^+$  Calcd for  $\text{C}_{24}\text{H}_{14}\text{F}_4\text{N}$  392.1057; Found 392.1040.

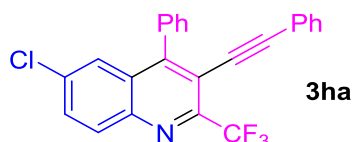

### 6-Chloro-4-phenyl-3-(phenylethynyl)-2-(trifluoromethyl)quinoline (3ha)

Eluent: petroleum ether/ethyl acetate (100:1). White solid (41.8 mg, 51%), mp 129.0-129.8 °C.  $^1\text{H}$  NMR (400 MHz,  $\text{CDCl}_3$ ):  $\delta$  8.19 (d,  $J = 8.8$  Hz, 1H), 7.72 (dd,  $J_1 = 8.8$  Hz,  $J_2 = 2.0$  Hz, 1H), 7.64 (d,  $J = 2.0$  Hz, 1H), 7.63-7.60 (m, 3H), 7.49-7.47 (m, 2H), 7.31-7.25 (m, 3H), 7.20-7.18 (m, 2H).  $^{13}\text{C}\{^1\text{H}\}$  NMR (150 MHz,  $\text{CDCl}_3$ ):  $\delta$  152.5, 147.4 (q,  $^2J_{\text{C-F}} = 33.0$  Hz), 143.4, 135.4, 135.2, 132.0, 131.7, 131.6, 129.9, 129.2, 129.1, 128.6, 128.4, 128.3, 125.1, 122.3, 121.4 (q,  $^1J_{\text{C-F}} = 274.2$  Hz), 114.7, 100.9, 83.0.  $^{19}\text{F}$  NMR (565 MHz,  $\text{CDCl}_3$ ):  $\delta$  -66.28 (s). HRMS (ESI)  $m/z$ :  $[\text{M}+\text{H}]^+$  Calcd for  $\text{C}_{24}\text{H}_{14}\text{ClF}_3\text{N}$  408.0761; Found 408.0756.

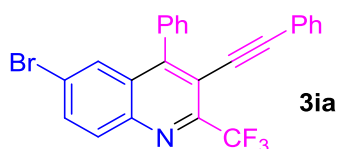

### 6-Bromo-4-phenyl-3-(phenylethynyl)-2-(trifluoromethyl)quinoline (3ia)

Eluent: petroleum ether/ethyl acetate (100:1). White solid (47.2 mg, 52%), mp 151.8-152.7 °C.  $^1\text{H}$  NMR (600 MHz,  $\text{CDCl}_3$ ):  $\delta$  8.11 (d,  $J = 9.0$  Hz, 1H), 7.85 (dd,  $J_1 = 8.4$  Hz,  $J_2 = 1.8$  Hz, 1H), 7.82 (d,  $J = 2.4$  Hz, 1H), 7.63-7.59 (m, 3H), 7.49-7.47 (m, 2H), 7.32-7.26 (m, 3H), 7.20-7.18 (m, 2H).  $^{13}\text{C}\{^1\text{H}\}$  NMR (150 MHz,  $\text{CDCl}_3$ ):  $\delta$  152.4, 147.5 (q,  $^2J_{\text{C-F}} = 32.9$  Hz), 143.6, 135.2, 134.3, 132.1, 131.6, 129.9, 129.2, 129.1, 128.7, 128.6, 128.42, 128.36, 123.8, 122.3, 121.4 (q,  $^1J_{\text{C-F}} = 276.2$  Hz), 114.7, 100.9, 83.0.  $^{19}\text{F}$  NMR (565 MHz,  $\text{CDCl}_3$ ):  $\delta$  -66.32 (s). HRMS (ESI)  $m/z$ :  $[\text{M}+\text{H}]^+$  Calcd for  $\text{C}_{24}\text{H}_{14}\text{BrF}_3\text{N}$  452.0256; Found 452.0248.

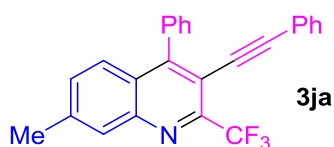

### 7-Methyl-4-phenyl-3-(phenylethynyl)-2-(trifluoromethyl)quinoline (3ja)

Eluent: petroleum ether/ethyl acetate (100:1). White solid (49.7 mg, 64%), mp 151.1-151.9 °C.  $^1\text{H}$  NMR (400 MHz,  $\text{CDCl}_3$ ):  $\delta$  8.03 (s, 1H), 7.58-7.56 (m, 4H), 7.49-7.47 (m, 2H), 7.39 (d,  $J = 8.8$  Hz, 1H), 7.27-7.23 (m, 3H), 7.20-7.18 (m, 2H), 2.57 (s, 3H).  $^{13}\text{C}\{^1\text{H}\}$  NMR (150 MHz,  $\text{CDCl}_3$ ):  $\delta$  153.2, 147.2 (q,  $^2J_{\text{C-F}} = 33.8$  Hz), 145.3, 141.6, 136.0, 131.5, 131.4, 130.0, 129.5, 128.81, 128.78, 128.3, 126.1, 125.5, 122.7, 121.6 (q,  $^1J_{\text{C-F}} = 275.9$  Hz), 112.8, 99.6, 83.5, 21.8.  $^{19}\text{F}$  NMR (376 MHz,  $\text{CDCl}_3$ ):  $\delta$  -66.06 (s). HRMS (ESI)  $m/z$ :  $[\text{M}+\text{H}]^+$  Calcd for  $\text{C}_{25}\text{H}_{17}\text{F}_3\text{N}$  388.1308; Found 388.1293.

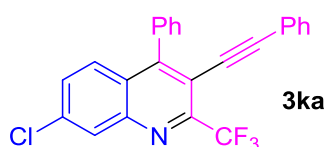

### 7-Chloro-4-phenyl-3-(phenylethynyl)-2-(trifluoromethyl)quinoline (3ka)

Eluent: petroleum ether/ethyl acetate (100:1). White solid (43.5 mg, 53%), mp 158.3-158.9 °C.  $^1\text{H}$  NMR (400 MHz,  $\text{CDCl}_3$ ):  $\delta$  8.25 (d,  $J = 2.0$  Hz, 1H), 7.64-7.58 (m, 4H), 7.51 (dd,  $J_1 = 8.8$  Hz,  $J_2 = 2.0$  Hz, 1H), 7.49-7.46 (m, 2H), 7.30-7.25 (m, 3H), 7.20-7.18 (m, 2H).  $^{13}\text{C}\{^1\text{H}\}$  NMR (150 MHz,  $\text{CDCl}_3$ ):  $\delta$  153.4, 148.3 (q,  $^2J_{\text{C-F}} = 32.4$  Hz), 145.4, 137.0, 135.4, 131.6, 130.1, 129.9, 129.4, 129.11, 129.08, 128.5, 128.4, 127.7, 126.0, 122.4, 121.3 (q,  $^1J_{\text{C-F}} = 275.1$  Hz), 114.0, 100.5, 83.0.  $^{19}\text{F}$  NMR (376 MHz,  $\text{CDCl}_3$ ):  $\delta$  -66.38 (s). HRMS (ESI)  $m/z$ :  $[\text{M}+\text{H}]^+$  Calcd for  $\text{C}_{24}\text{H}_{14}\text{ClF}_3\text{N}$  408.0761; Found 408.0765.

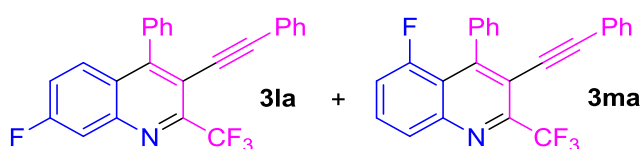

**7-Fluoro-4-phenyl-3-(phenylethynyl)-2-(trifluoromethyl)quinoline**      and      **5-Fluoro-4-phenyl-3-(phenylethynyl)-2-(trifluoromethyl)quinoline**

Eluent: petroleum ether/ethyl acetate (100:1). White solid (43.6 mg, 56%), mp 143.5-144.3 °C.  $^1\text{H}$  NMR (600 MHz,  $\text{CDCl}_3$ ):  $\delta$  8.09 (d,  $J = 8.4$  Hz, 0.33H), 7.88 (dd,  $J_1 = 9.6$  Hz,  $J_2 = 2.4$  Hz, 1H), 7.75-7.72 (m, 0.33H), 7.70 (dd,  $J_1 = 9.0$  Hz,  $J_2 = 6.0$  Hz, 1H), 7.61-7.58 (m, 3H), 7.54-7.53 (m, 0.99H), 7.49-7.47 (m, 2H), 7.42-7.41 (m, 0.66H), 7.38-7.35 (m, 1H), 7.31-7.24 (m, 4.32H), 7.19-7.18 (m, 2H), 7.14-7.12 (m, 0.66H).  $^{13}\text{C}\{^1\text{H}\}$  NMR (150 MHz,  $\text{CDCl}_3$ ):  $\delta$  163.7 (d,  $^1J_{\text{C-F}} = 252.3$  Hz), 157.7 (d,  $^1J_{\text{C-F}} = 259.2$  Hz), 153.5, 150.8 (d,  $^3J_{\text{C-F}} = 3.9$  Hz), 148.4 (q,  $^2J_{\text{C-F}} = 32.4$  Hz), 147.8 (q,  $^2J_{\text{C-F}} = 32.7$  Hz), 146.2 (d,  $^3J_{\text{C-F}} = 13.5$  Hz), 146.0, 138.4 (d,  $^4J_{\text{C-F}} = 3.6$  Hz), 135.6, 131.6, 131.5, 130.6 (d,  $^3J_{\text{C-F}} = 8.0$  Hz), 129.9, 129.08, 129.06, 129.0, 128.9 (d,  $^3J_{\text{C-F}} = 9.6$  Hz), 128.5 (d,  $^4J_{\text{C-F}} = 3.5$  Hz), 128.5, 128.34, 128.32, 128.30, 127.8, 126.9 (d,  $^3J_{\text{C-F}} = 4.2$  Hz), 124.7, 122.4, 121.4 (q,  $^1J_{\text{C-F}} = 272.4$  Hz), 121.3 (q,  $^1J_{\text{C-F}} = 275.0$  Hz), 119.7 (d,  $^2J_{\text{C-F}} = 25.5$  Hz), 118.3 (d,  $^2J_{\text{C-F}} = 9.6$  Hz), 115.7, 114.5 (d,  $^2J_{\text{C-F}} = 21.3$  Hz), 114.2 (d,  $^2J_{\text{C-F}} = 20.7$  Hz), 113.3 (d,  $^4J_{\text{C-F}} = 3.8$  Hz), 101.5, 100.1, 83.0, 82.7.  $^{19}\text{F}$  NMR (565 MHz,  $\text{CDCl}_3$ ):  $\delta$  -66.34 (s), -66.43 (s), -105.53 (dd,  $J_1 = 9.6$  Hz,  $J_2 = 6.8$  Hz), -106.97 – -107.01 (m). HRMS (ESI)  $m/z$ :  $[\text{M}+\text{H}]^+$  Calcd for  $\text{C}_{24}\text{H}_{14}\text{F}_4\text{N}$  392.1057; Found 392.1065.

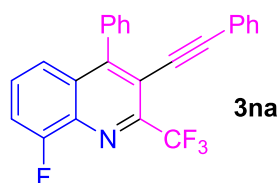

### 8-Fluoro-4-phenyl-3-(phenylethynyl)-2-(trifluoromethyl)quinoline (3na)

Eluent: petroleum ether/ethyl acetate (100:1). White solid (32.4 mg, 41%), mp 165.7-166.4 °C.  $^1\text{H}$  NMR (600 MHz,  $\text{CDCl}_3$ ):  $\delta$  7.60-7.58 (m, 3H), 7.53-7.46 (m, 5H), 7.31-7.26 (m, 3H), 7.21-7.19 (m, 2H).  $^{13}\text{C}\{^1\text{H}\}$  NMR (150 MHz,  $\text{CDCl}_3$ ):  $\delta$  158.4 (d,  $^1J_{\text{C-F}} = 258.9$  Hz), 153.3 (d,  $^4J_{\text{C-F}} = 2.1$  Hz), 147.4 (q,  $^2J_{\text{C-F}} = 31.5$  Hz), 135.5, 135.3 (d,  $^3J_{\text{C-F}} = 10.7$  Hz), 131.6, 129.9, 129.2, 129.08, 129.07 (d,  $^2J_{\text{C-F}} = 15.0$  Hz), 128.44, 128.37, 122.3, 122.1 (d,  $^3J_{\text{C-F}} = 5.0$  Hz), 121.3 (q,  $^1J_{\text{C-F}} = 273.8$  Hz), 114.93 (d,  $^2J_{\text{C-F}} = 18.2$  Hz), 114.87, 100.9, 83.0.  $^{19}\text{F}$  NMR (565 MHz,  $\text{CDCl}_3$ ):  $\delta$  -66.24 (s), -122.46 – -122.49 (m). HRMS (ESI)  $m/z$ :  $[\text{M}+\text{H}]^+$  Calcd for  $\text{C}_{24}\text{H}_{14}\text{F}_4\text{N}$  392.1057; Found 392.1062.

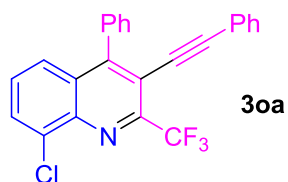

### 8-Chloro-4-phenyl-3-(phenylethynyl)-2-(trifluoromethyl)quinoline (3oa)

Eluent: petroleum ether/ethyl acetate (100:1). White solid (26.8 mg, 33%), mp 168.1-168.9 °C.  $^1\text{H}$  NMR (400 MHz,  $\text{CDCl}_3$ ):  $\delta$  7.89 (dd,  $J_1 = 7.2$  Hz,  $J_2 = 1.2$  Hz, 1H), 7.61-7.58 (m, 4H), 7.50-7.46 (m, 3H), 7.31-7.25 (m, 3H), 7.21-7.18 (m, 2H).  $^{13}\text{C}\{^1\text{H}\}$  NMR (150 MHz,  $\text{CDCl}_3$ ):  $\delta$  153.8, 147.5 (q,  $^2J_{\text{C-F}} = 32.4$  Hz), 141.4, 135.6, 135.1, 131.6, 130.8, 129.9, 129.1, 129.04, 128.96, 128.9, 128.44, 128.36, 125.5, 122.3, 121.4 (q,  $^1J_{\text{C-F}} = 277.7$  Hz), 114.8, 100.9, 83.0.  $^{19}\text{F}$  NMR (376 MHz,  $\text{CDCl}_3$ ):  $\delta$  -66.26 (s). HRMS (ESI) m/z:  $[\text{M}+\text{H}]^+$  Calcd for  $\text{C}_{24}\text{H}_{14}\text{ClF}_3\text{N}$  408.0761; Found 408.0747.

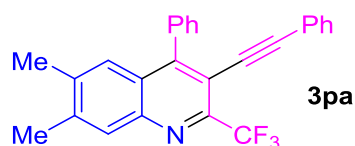

### 6,7-Dimethyl-4-phenyl-3-(phenylethynyl)-2-(trifluoromethyl)quinoline (3pa)

Eluent: petroleum ether/ethyl acetate (100:1). White solid (48.5 mg, 60%), mp 193.6-194.2 °C.  $^1\text{H}$  NMR (400 MHz,  $\text{CDCl}_3$ ):  $\delta$  8.02 (s, 1H), 7.59-7.54 (m, 3H), 7.49-7.47 (m, 2H), 7.39 (s, 1H), 7.28-7.24 (m, 3H), 7.19-7.17 (m, 2H), 2.48 (s, 3H), 2.36 (s, 3H).  $^{13}\text{C}\{^1\text{H}\}$  NMR (150 MHz,  $\text{CDCl}_3$ ):  $\delta$  152.4, 146.4 (q,  $^2J_{\text{C-F}} = 31.4$  Hz), 144.2, 141.6, 139.6, 136.2, 131.5, 130.0, 129.8, 128.72, 128.65, 128.3, 126.0, 125.4, 122.7, 121.7 (q,  $^1J_{\text{C-F}} = 275.0$  Hz), 112.7, 99.4, 83.6, 20.41, 20.37.  $^{19}\text{F}$  NMR (565 MHz,  $\text{CDCl}_3$ ):  $\delta$  -65.92 (s). HRMS (ESI) m/z:  $[\text{M}+\text{H}]^+$  Calcd for  $\text{C}_{26}\text{H}_{19}\text{F}_3\text{N}$  402.1464; Found 402.1448.

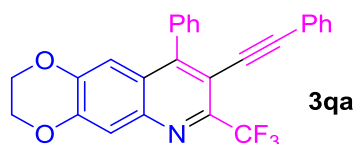

### 9-Phenyl-8-(phenylethynyl)-7-(trifluoromethyl)-2,3-dihydro-[1,4]dioxino[2,3-g]quinoline (3qa)

Eluent: petroleum ether/ethyl acetate (20:1). White solid (18.3 mg, 21%), mp 197.2-198.0 °C.  $^1\text{H}$  NMR (400 MHz,  $\text{CDCl}_3$ ):  $\delta$  7.69 (s, 1H), 7.58-7.54 (m, 3H), 7.47-7.45 (m, 2H), 7.27-7.24 (m, 3H), 7.18-7.16 (m, 2H), 7.06 (s, 1H), 4.38-4.35 (m, 4H).  $^{13}\text{C}\{^1\text{H}\}$  NMR (150 MHz,  $\text{CDCl}_3$ ):  $\delta$  151.7, 148.0, 146.3, 145.8 (q,  $^2J_{\text{C-F}} = 32.4$  Hz), 141.8, 136.2, 131.4, 129.8, 128.7, 128.6, 128.32, 128.26, 122.8, 121.7 (q,  $^1J_{\text{C-F}} = 273.0$  Hz), 115.3, 111.0, 99.1, 83.6, 64.42, 64.39.  $^{19}\text{F}$  NMR (376 MHz,  $\text{CDCl}_3$ ):  $\delta$  -65.87 (s). HRMS (ESI) m/z:  $[\text{M}+\text{H}]^+$  Calcd for  $\text{C}_{26}\text{H}_{17}\text{F}_3\text{NO}_2$  432.1206; Found 432.1216.

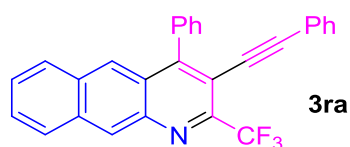

#### 4-Phenyl-3-(phenylethynyl)-2-(trifluoromethyl)benzo[g]quinoline (3ra)

Eluent: petroleum ether/ethyl acetate (100:1). White solid (40.2 mg, 47%), mp 163.2-164.0 °C.  $^1\text{H}$  NMR (600 MHz,  $\text{CDCl}_3$ ):  $\delta$  8.87 (s, 1H), 8.22 (s, 1H), 8.11 (d,  $J = 8.4$  Hz, 1H), 7.91 (d,  $J = 8.4$  Hz, 1H), 7.67-7.63 (m, 3H), 7.60-7.57 (m, 3H), 7.53 (t,  $J = 7.8$  Hz, 1H), 7.31-7.27 (m, 3H), 7.23-7.22 (m, 2H).  $^{13}\text{C}\{^1\text{H}\}$  NMR (150 MHz,  $\text{CDCl}_3$ ):  $\delta$  153.7, 147.5 (q,  $^2J_{\text{C-F}} = 33.5$  Hz), 141.1, 136.1, 134.3, 133.2, 131.5, 130.1, 129.3, 128.94, 128.86, 128.7, 128.6, 128.5, 128.3, 127.4, 127.3, 126.2, 125.4, 122.7, 121.5 (q,  $^1J_{\text{C-F}} = 274.4$  Hz), 112.1, 99.8, 83.8.  $^{19}\text{F}$  NMR (565 MHz,  $\text{CDCl}_3$ ):  $\delta$  -66.49 (s). HRMS (ESI) m/z:  $[\text{M}+\text{H}]^+$  Calcd for  $\text{C}_{28}\text{H}_{17}\text{F}_3\text{N}$  424.1308; Found 424.1298.

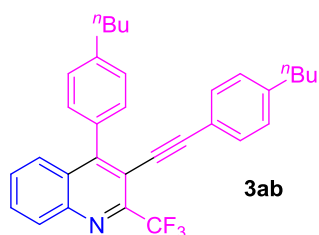

#### 4-(4-Butylphenyl)-3-((4-butylphenyl)ethynyl)-2-(trifluoromethyl)quinoline (3ab)

Eluent: petroleum ether/ethyl acetate (100:1). White solid (52.2 mg, 54%), mp 127.1-127.8 °C.  $^1\text{H}$  NMR (400 MHz,  $\text{CDCl}_3$ ):  $\delta$  8.24 (d,  $J = 8.0$  Hz, 1H), 7.79-7.75 (m, 1H), 7.73 (d,  $J = 8.0$  Hz, 1H), 7.59-7.55 (m, 1H), 7.40 (s, 4H), 7.12-7.06 (m, 4H), 2.77 (t,  $J = 7.6$  Hz, 2H), 2.58 (t,  $J = 7.6$  Hz, 2H), 1.77-1.70 (m, 2H), 1.58-1.52 (m,

2H), 1.48-1.41 (m, 2H), 1.35-1.30 (m, 2H), 1.00 (t,  $J = 7.2$  Hz, 3H), 0.91 (t,  $J = 7.2$  Hz, 3H).  $^{13}\text{C}\{^1\text{H}\}$  NMR (150 MHz,  $\text{CDCl}_3$ ):  $\delta$  153.5, 147.2 (q,  $^2J_{\text{C-F}} = 33.0$  Hz), 145.0, 144.2, 143.6, 133.1, 131.5, 130.6, 130.4, 129.9, 128.9, 128.4, 128.3, 127.6, 126.5, 121.6 (q,  $^1J_{\text{C-F}} = 274.5$  Hz), 119.8, 113.9, 100.2, 83.0, 35.7, 35.6, 33.8, 33.4, 22.4, 22.3, 14.1, 13.9.  $^{19}\text{F}$  NMR (565 MHz,  $\text{CDCl}_3$ ):  $\delta$  -66.20 (s). HRMS (ESI)  $m/z$ :  $[\text{M}+\text{H}]^+$  Calcd for  $\text{C}_{32}\text{H}_{31}\text{F}_3\text{N}$  486.2403; Found 486.2399.

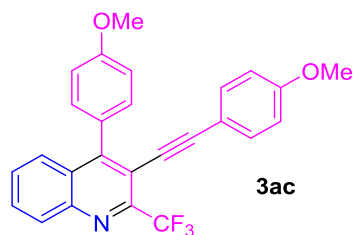

#### 4-(4-Methoxyphenyl)-3-((4-methoxyphenyl)ethynyl)-2-(trifluoromethyl)quinoline (3ac)

Eluent: petroleum ether/ethyl acetate (30:1). Yellow solid (38.1 mg, 44%), mp 132.8-133.6 °C.  $^1\text{H}$  NMR (600 MHz,  $\text{CDCl}_3$ ):  $\delta$  8.23 (d,  $J = 8.4$  Hz, 1H), 7.77-7.73 (m, 2H), 7.57 (t,  $J = 7.8$  Hz, 1H), 7.45 (d,  $J = 9.0$  Hz, 2H), 7.21 (d,  $J = 8.4$  Hz, 2H), 7.11 (d,  $J = 8.4$  Hz, 2H), 6.81 (d,  $J = 9.0$  Hz, 2H), 3.94 (s, 3H), 3.80 (s, 3H).  $^{13}\text{C}\{^1\text{H}\}$  NMR (150 MHz,  $\text{CDCl}_3$ ):  $\delta$  160.2, 160.0, 152.5, 147.2 (q,  $^2J_{\text{C-F}} = 31.5$  Hz), 144.9, 133.1, 131.5, 130.5, 130.4, 129.0, 128.0, 127.8, 126.4, 121.6 (q,  $^1J_{\text{C-F}} = 273.9$  Hz), 114.8, 114.0, 113.7, 100.1, 82.5, 55.5, 55.3.  $^{19}\text{F}$  NMR (565 MHz,  $\text{CDCl}_3$ ):  $\delta$  -66.23 (s). HRMS (ESI)  $m/z$ :  $[\text{M}+\text{H}]^+$  Calcd for  $\text{C}_{26}\text{H}_{19}\text{F}_3\text{NO}_2$  434.1362; Found 434.1368.

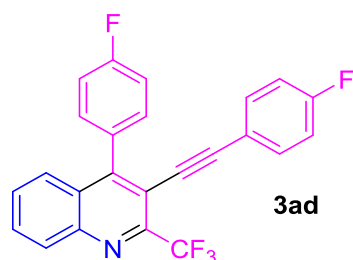

#### 4-(4-Fluorophenyl)-3-((4-fluorophenyl)ethynyl)-2-(trifluoromethyl)quinoline (3ad)

Eluent: petroleum ether/ethyl acetate (100:1). White solid (50.9 mg, 62%), mp 163.4-164.2 °C.  $^1\text{H}$  NMR (600 MHz,  $\text{CDCl}_3$ ):  $\delta$  8.26 (d,  $J = 8.4$  Hz, 1H), 7.82-7.79 (m, 1H), 7.66 (d,  $J = 7.8$  Hz, 1H), 7.61 (t,  $J = 7.2$  Hz, 1H),



7.50-7.48 (m, 2H), 7.30 (t,  $J = 8.4$  Hz, 2H), 7.23-7.20 (m, 2H), 7.00 (t,  $J = 9.0$  Hz, 2H).  $^{13}\text{C}\{^1\text{H}\}$  NMR (150 MHz,  $\text{CDCl}_3$ ):  $\delta$  163.1 (d,  $^1J_{\text{C-F}} = 247.1$  Hz), 163.0 (d,  $^1J_{\text{C-F}} = 249.2$  Hz), 152.1, 147.2 (q,  $^2J_{\text{C-F}} = 33.8$  Hz), 145.1, 133.5 (d,  $^3J_{\text{C-F}} = 8.3$  Hz), 131.9 (d,  $^3J_{\text{C-F}} = 8.1$  Hz), 131.7 (d,  $^4J_{\text{C-F}} = 3.0$  Hz), 130.9, 130.6, 129.4, 127.4, 126.1, 121.5 (q,  $^1J_{\text{C-F}} = 274.1$  Hz), 118.5 (d,  $^4J_{\text{C-F}} = 3.2$  Hz), 115.8 (d,  $^2J_{\text{C-F}} = 21.9$  Hz), 115.5 (d,  $^2J_{\text{C-F}} = 21.3$  Hz), 113.7, 99.1, 82.9.  $^{19}\text{F}$  NMR (565 MHz,  $\text{CDCl}_3$ ):  $\delta$  -66.24 (s), -109.22 – -109.27 (m), -112.13 – -112.18 (m). HRMS (ESI)  $m/z$ :  $[\text{M}+\text{H}]^+$  Calcd for  $\text{C}_{24}\text{H}_{13}\text{F}_5\text{N}$  410.0963; Found 410.0966.

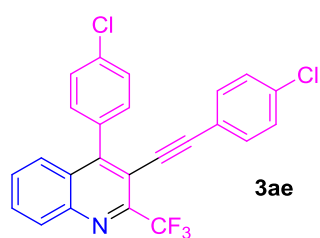

#### 4-(4-Chlorophenyl)-3-((4-chlorophenyl)ethynyl)-2-(trifluoromethyl)quinoline (3ae)

Eluent: petroleum ether/ethyl acetate (100:1). White solid (60.3 mg, 68%), mp 145.1-145.7 °C.  $^1\text{H}$  NMR (600 MHz,  $\text{CDCl}_3$ ):  $\delta$  8.26 (d,  $J = 8.4$  Hz, 1H), 7.83-7.81 (m, 1H), 7.65-7.57 (m, 4H), 7.45-7.43 (m, 2H), 7.30-7.27 (m, 2H), 7.16-7.14 (m, 2H).  $^{13}\text{C}\{^1\text{H}\}$  NMR (150 MHz,  $\text{CDCl}_3$ ):  $\delta$  152.0, 147.2 (q,  $^2J_{\text{C-F}} = 32.9$  Hz), 145.1, 135.3, 135.2, 134.1, 132.7, 131.4, 131.1, 130.6, 129.5, 128.8, 128.7, 127.2, 126.0, 121.4 (q,  $^1J_{\text{C-F}} = 275.0$  Hz), 120.8, 113.3, 99.1, 84.0.  $^{19}\text{F}$  NMR (565 MHz,  $\text{CDCl}_3$ ):  $\delta$  -66.20 (s). HRMS (ESI)  $m/z$ :  $[\text{M}+\text{H}]^+$  Calcd for  $\text{C}_{24}\text{H}_{13}\text{Cl}_2\text{F}_3\text{N}$  442.0372; Found 442.0387.

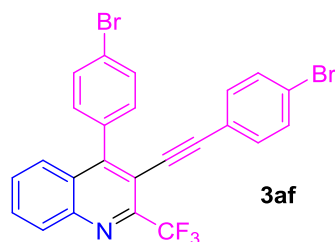

#### 4-(4-Bromophenyl)-3-((4-bromophenyl)ethynyl)-2-(trifluoromethyl)quinoline (3af)

Eluent: petroleum ether/ethyl acetate (100:1). Yellowish solid (55.6 mg, 52%), mp 168.2-168.9 °C.  $^1\text{H}$  NMR (400 MHz,  $\text{CDCl}_3$ ):  $\delta$  8.26 (d,  $J = 8.4$  Hz, 1H), 7.84-7.80 (m, 1H), 7.74 (d,  $J = 8.8$  Hz, 2H), 7.66-7.59 (m, 2H), 7.44 (d,  $J = 8.4$  Hz, 2H), 7.38 (d,  $J = 8.8$  Hz, 2H), 7.08 (d,  $J = 8.4$  Hz, 2H).  $^{13}\text{C}\{^1\text{H}\}$  NMR (150 MHz,  $\text{CDCl}_3$ ):

$\delta$  152.1, 147.1 (q,  $^2J_{C-F} = 33.3$  Hz), 145.1, 134.6, 132.9, 131.8, 131.68, 131.65, 131.1, 130.6, 129.5, 127.1, 126.0, 123.6, 123.3, 121.4 (q,  $^1J_{C-F} = 274.8$  Hz), 121.2, 113.3, 99.3, 84.1.  $^{19}\text{F}$  NMR (565 MHz,  $\text{CDCl}_3$ ):  $\delta$  -66.19 (s). HRMS (ESI)  $m/z$ :  $[\text{M}+\text{H}]^+$  Calcd for  $\text{C}_{24}\text{H}_{13}\text{Br}_2\text{F}_3\text{N}$  529.9361; Found 529.9371.

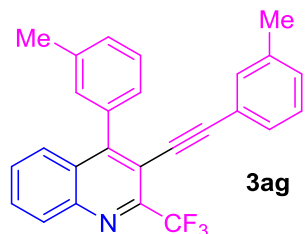

#### 4-(*m*-Tolyl)-3-(*m*-tolylethynyl)-2-(trifluoromethyl)quinoline (3ag)

Eluent: petroleum ether/ethyl acetate (100:1). White solid (49.6 mg, 62%), mp 114.4-115.0 °C.  $^1\text{H}$  NMR (400 MHz,  $\text{CDCl}_3$ ):  $\delta$  8.25 (d,  $J = 8.4$  Hz, 1H), 7.80-7.76 (m, 1H), 7.72 (d,  $J = 8.4$  Hz, 1H), 7.60-7.56 (m, 1H), 7.48 (t,  $J = 7.6$  Hz, 1H), 7.38 (d,  $J = 7.6$  Hz, 1H), 7.32 (s, 1H), 7.29 (d,  $J = 7.6$  Hz, 1H), 7.16 (t,  $J = 7.6$  Hz, 1H), 7.11 (d,  $J = 7.6$  Hz, 1H), 7.03 (s, 1H), 7.00 (d,  $J = 7.2$  Hz, 1H), 2.47 (s, 3H), 2.30 (s, 3H).  $^{13}\text{C}\{^1\text{H}\}$  NMR (150 MHz,  $\text{CDCl}_3$ ):  $\delta$  153.6, 147.2 (q,  $^2J_{C-F} = 32.1$  Hz), 145.0, 138.02, 137.97, 135.7, 132.1, 130.7, 130.6, 130.4, 129.8, 129.5, 129.0, 128.6, 128.23, 128.21, 127.5, 127.1, 126.5, 122.4, 121.6 (q,  $^1J_{C-F} = 276.2$  Hz), 113.7, 100.3, 83.1, 21.6, 21.2.  $^{19}\text{F}$  NMR (565 MHz,  $\text{CDCl}_3$ ):  $\delta$  -66.16 (s). HRMS (ESI)  $m/z$ :  $[\text{M}+\text{H}]^+$  Calcd for  $\text{C}_{26}\text{H}_{19}\text{F}_3\text{N}$  402.1464; Found 402.1454.

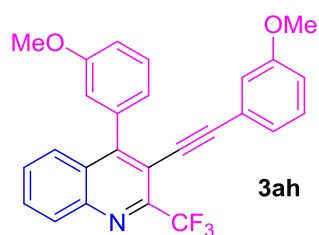

#### 4-(3-Methoxyphenyl)-3-((3-methoxyphenyl)ethynyl)-2-(trifluoromethyl)quinoline (3ah)

Eluent: petroleum ether/ethyl acetate (50:1). White solid (45.9 mg, 53%), mp 156.5-157.3 °C.  $^1\text{H}$  NMR (600 MHz,  $\text{CDCl}_3$ ):  $\delta$  8.25 (d,  $J = 8.4$  Hz, 1H), 7.80-7.78 (m, 1H), 7.73 (d,  $J = 8.4$  Hz, 1H), 7.60-7.57 (m, 1H), 7.50 (t,  $J = 7.8$  Hz, 1H), 7.19 (t,  $J = 7.8$  Hz, 1H), 7.11-7.09 (m, 1H), 7.07-7.04 (m, 2H), 6.87-6.84 (m, 2H), 6.712-6.706 (m, 1H), 3.85 (s, 3H), 3.77 (s, 3H).  $^{13}\text{C}\{^1\text{H}\}$  NMR (100 MHz,  $\text{CDCl}_3$ ):  $\delta$  159.6, 159.3, 153.4,

147.1 (q,  $^2J_{C-F} = 32.5$  Hz), 145.1, 137.1, 130.8, 130.4, 129.5, 129.4, 129.2, 127.4, 126.4, 124.1, 123.5, 122.4, 121.5 (q,  $^1J_{C-F} = 274.8$  Hz), 116.2, 115.7, 115.3, 114.7, 113.5, 100.1, 83.1, 55.4, 55.3.  $^{19}\text{F}$  NMR (565 MHz,  $\text{CDCl}_3$ ):  $\delta$  -66.10 (s). HRMS (ESI) m/z:  $[\text{M}+\text{H}]^+$  Calcd for  $\text{C}_{26}\text{H}_{19}\text{F}_3\text{NO}_2$  434.1362; Found 434.1376.

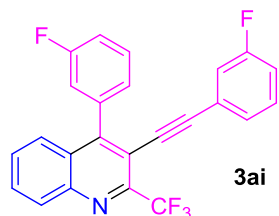

#### 4-(3-Fluorophenyl)-3-((3-fluorophenyl)ethynyl)-2-(trifluoromethyl)quinoline (3ai)

Eluent: petroleum ether/ethyl acetate (100:1). White solid (33.9 mg, 41%), mp 148.5-149.1 °C.  $^1\text{H}$  NMR (600 MHz,  $\text{CDCl}_3$ ):  $\delta$  8.27 (d,  $J = 8.4$  Hz, 1H), 7.84-7.81 (m, 1H), 7.67 (d,  $J = 7.8$  Hz, 1H), 7.64-7.61 (m, 1H), 7.58 (td,  $J_1 = 7.8$  Hz,  $J_2 = 6.0$  Hz, 1H), 7.32-7.22 (m, 4H), 7.04-7.02 (m, 2H), 6.91-6.89 (m, 1H).  $^{13}\text{C}\{^1\text{H}\}$  NMR (150 MHz,  $\text{CDCl}_3$ ):  $\delta$  162.7 (d,  $^1J_{C-F} = 245.7$  Hz), 162.3 (d,  $^1J_{C-F} = 245.4$  Hz), 152.0, 147.2 (q,  $^2J_{C-F} = 32.7$  Hz), 145.2, 137.7 (d,  $^3J_{C-F} = 9.3$  Hz), 131.2, 130.6, 130.2 (d,  $^3J_{C-F} = 9.0$  Hz), 130.1 (d,  $^3J_{C-F} = 8.7$  Hz), 129.5, 127.4 (d,  $^4J_{C-F} = 3.0$  Hz), 127.1, 126.1, 125.8 (d,  $^4J_{C-F} = 3.5$  Hz), 124.1 (d,  $^3J_{C-F} = 9.2$  Hz), 121.4 (q,  $^1J_{C-F} = 276.2$  Hz), 118.2 (d,  $^2J_{C-F} = 22.7$  Hz), 117.1 (d,  $^2J_{C-F} = 21.5$  Hz), 116.5 (d,  $^2J_{C-F} = 22.4$  Hz), 116.0 (d,  $^2J_{C-F} = 20.7$  Hz), 113.2, 98.9 (d,  $^4J_{C-F} = 2.1$  Hz), 83.7.  $^{19}\text{F}$  NMR (565 MHz,  $\text{CDCl}_3$ ):  $\delta$  -66.18 (s), -112.31 – -112.35 (m), -112.49 – -112.53 (m). HRMS (ESI) m/z:  $[\text{M}+\text{H}]^+$  Calcd for  $\text{C}_{24}\text{H}_{13}\text{F}_5\text{N}$  410.0963; Found 410.0969.

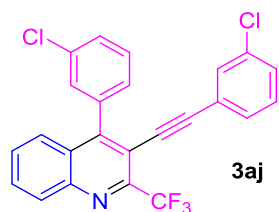

#### 4-(3-Chlorophenyl)-3-((3-chlorophenyl)ethynyl)-2-(trifluoromethyl)quinoline (3aj)

Eluent: petroleum ether/ethyl acetate (100:1). White solid (44.3 mg, 50%), mp 125.1-125.9 °C.  $^1\text{H}$  NMR (400 MHz,  $\text{CDCl}_3$ ):  $\delta$  8.27 (d,  $J = 8.8$  Hz, 1H), 7.85-7.81 (m, 1H), 7.69-7.61 (m, 2H), 7.60-7.53 (m, 3H), 7.39-7.36 (m, 1H), 7.32-7.29 (m, 1H), 7.26-7.22 (m, 2H), 7.14-7.12 (m, 1H).  $^{13}\text{C}\{^1\text{H}\}$  NMR (150 MHz,  $\text{CDCl}_3$ ):  $\delta$  151.8,

147.2 (q,  $^2J_{C-F} = 32.7$  Hz), 145.2, 137.4, 134.5, 134.3, 131.3, 131.2, 130.6, 130.0, 129.8, 129.7, 129.6, 129.4, 129.2, 128.2, 127.0, 126.1, 123.9, 121.4 (q,  $^1J_{C-F} = 276.6$  Hz), 113.1, 98.9, 84.0.  $^{19}\text{F}$  NMR (376 MHz,  $\text{CDCl}_3$ ):  $\delta$  -66.17 (s). HRMS (ESI) m/z:  $[\text{M}+\text{H}]^+$  Calcd for  $\text{C}_{24}\text{H}_{13}\text{Cl}_2\text{F}_3\text{N}$  442.0372; Found 442.0380.

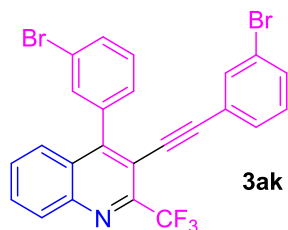

#### 4-(3-Bromophenyl)-3-((3-bromophenyl)ethynyl)-2-(trifluoromethyl)quinoline (3ak)

Eluent: petroleum ether/ethyl acetate (100:1). Yellow solid (44.5 mg, 42%), mp 140.1-140.7 °C.  $^1\text{H}$  NMR (600 MHz,  $\text{CDCl}_3$ ):  $\delta$  7.27 (d,  $J = 8.4$  Hz, 1H), 7.84-7.82 (m, 1H), 7.74 (d,  $J = 7.8$  Hz, 1H), 7.70 (t,  $J = 1.8$  Hz, 1H), 7.68 (d,  $J = 7.2$  Hz, 1H), 7.65-7.62 (m, 1H), 7.49 (t,  $J = 7.8$  Hz, 1H), 7.46-7.44 (m, 1H), 7.42 (d,  $J = 7.8$  Hz, 1H), 7.39 (s, 1H), 7.20-7.16 (m, 2H).  $^{13}\text{C}\{^1\text{H}\}$  NMR (150 MHz,  $\text{CDCl}_3$ ):  $\delta$  151.7, 147.1 (q,  $^2J_{C-F} = 32.6$  Hz), 145.2, 137.6, 134.2, 132.9, 132.3, 132.1, 131.2, 130.7, 130.1, 130.0, 129.9, 129.6, 128.7, 127.0, 126.1, 124.2, 122.5, 122.2, 121.4 (q,  $^1J_{C-F} = 275.0$  Hz), 113.1, 98.9, 84.1.  $^{19}\text{F}$  NMR (565 MHz,  $\text{CDCl}_3$ ):  $\delta$  -66.14 (s). HRMS (ESI) m/z:  $[\text{M}+\text{H}]^+$  Calcd for  $\text{C}_{24}\text{H}_{13}\text{Br}_2\text{F}_3\text{N}$  529.9361; Found 529.9372.

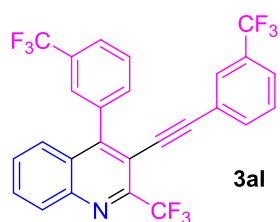

#### 2-(Trifluoromethyl)-4-(3-(trifluoromethyl)phenyl)-3-((3-(trifluoromethyl)phenyl)ethynyl)quinoline (3al)

Eluent: petroleum ether/ethyl acetate (100:1). White solid (33.0 mg, 32%), mp 120.1-120.8 °C.  $^1\text{H}$  NMR (400 MHz,  $\text{CDCl}_3$ ):  $\delta$  8.30 (d,  $J = 8.4$  Hz, 1H), 7.89-7.84 (m, 3H), 7.76 (t,  $J = 7.6$  Hz, 1H), 7.69 (d,  $J = 8.0$  Hz, 1H), 7.66-7.61 (m, 2H), 7.56 (d,  $J = 7.6$  Hz, 1H), 7.42 (t,  $J = 8.0$  Hz, 1H), 7.39-7.36 (m, 2H).  $^{13}\text{C}\{^1\text{H}\}$  NMR (150 MHz,  $\text{CDCl}_3$ ):  $\delta$  151.9, 147.2 (q,  $^2J_{C-F} = 32.9$  Hz), 145.3, 136.5, 134.4, 133.3, 131.4, 131.3 (q,  $^2J_{C-F} = 32.9$  Hz), 131.1 (q,  $^2J_{C-F} = 32.7$  Hz), 130.8, 129.8, 129.1, 129.0, 128.2 (q,  $^3J_{C-F} = 4.1$  Hz), 126.94, 126.93 (q,  $^3J_{C-F} = 3.9$

Hz), 125.861, 125.862 (q,  $^3J_{C-F} = 3.7$  Hz), 125.7 (q,  $^3J_{C-F} = 3.6$  Hz), 123.9 (q,  $^1J_{C-F} = 270.2$  Hz), 123.5 (q,  $^1J_{C-F} = 270.9$  Hz), 123.0, 121.4 (q,  $^1J_{C-F} = 274.8$  Hz), 113.1, 98.8, 84.1.  $^{19}\text{F}$  NMR (565 MHz,  $\text{CDCl}_3$ ):  $\delta$  -62.61 (s), -63.18 (s), -66.18 (s). HRMS (ESI)  $m/z$ :  $[\text{M}+\text{H}]^+$  Calcd for  $\text{C}_{26}\text{H}_{13}\text{F}_9\text{N}$  510.0899; Found 510.0889.

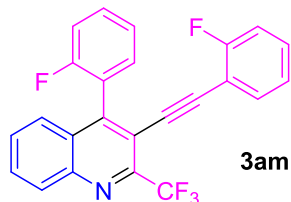

#### 4-(2-Fluorophenyl)-3-((2-fluorophenyl)ethynyl)-2-(trifluoromethyl)quinoline (3am)

Eluent: petroleum ether/ethyl acetate (100:1). White solid (32.8 mg, 40%), mp 151.3-151.9 °C.  $^1\text{H}$  NMR (600 MHz,  $\text{CDCl}_3$ ):  $\delta$  8.28 (d,  $J = 8.4$  Hz, 1H), 7.83-7.81 (m, 1H), 7.64-7.61 (m, 2H), 7.59-7.55 (m, 1H), 7.44 (td,  $J_1 = 7.2$  Hz,  $J_2 = 1.2$  Hz, 1H), 7.37 (td,  $J_1 = 7.2$  Hz,  $J_2 = 1.2$  Hz, 1H), 7.33-7.27 (m, 2H), 7.23-7.21 (m, 1H), 7.07-7.04 (m, 1H), 7.01 (t,  $J = 7.8$  Hz, 1H).  $^{13}\text{C}\{^1\text{H}\}$  NMR (150 MHz,  $\text{CDCl}_3$ ):  $\delta$  162.6 (d,  $^1J_{C-F} = 252.6$  Hz), 159.7 (d,  $^1J_{C-F} = 247.4$  Hz), 148.0, 147.1 (q,  $^2J_{C-F} = 32.7$  Hz), 145.0, 133.5, 131.8 (d,  $^4J_{C-F} = 2.7$  Hz), 131.2 (d,  $^3J_{C-F} = 8.4$  Hz), 131.1, 130.8 (d,  $^3J_{C-F} = 7.5$  Hz), 130.6, 129.5, 127.4, 126.0, 124.3 (d,  $^3J_{C-F} = 3.5$  Hz), 123.9 (d,  $^3J_{C-F} = 4.5$  Hz), 123.2 (d,  $^2J_{C-F} = 15.9$  Hz), 121.4 (q,  $^1J_{C-F} = 275.3$  Hz), 116.1 (d,  $^2J_{C-F} = 21.5$  Hz), 115.6 (d,  $^2J_{C-F} = 20.6$  Hz), 114.3, 111.1 (d,  $^2J_{C-F} = 15.9$  Hz), 93.5, 87.5 (d,  $^4J_{C-F} = 2.1$  Hz).  $^{19}\text{F}$  NMR (565 MHz,  $\text{CDCl}_3$ ):  $\delta$  -66.16 (s), -108.80 – -108.84 (m), -112.85 – -112.88 (m). HRMS (ESI)  $m/z$ :  $[\text{M}+\text{H}]^+$  Calcd for  $\text{C}_{24}\text{H}_{13}\text{F}_5\text{N}$  410.0963; Found 410.0961.

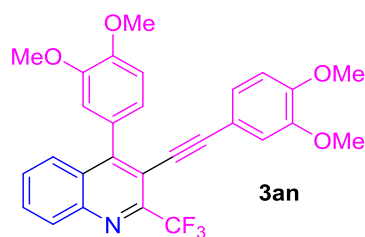

#### 4-(3,4-Dimethoxyphenyl)-3-((3,4-dimethoxyphenyl)ethynyl)-2-(trifluoromethyl)quinoline (3an)

Eluent: petroleum ether/ethyl acetate (5:1). Yellow solid (36.4 mg, 37%), mp 163.5-164.2 °C.  $^1\text{H}$  NMR (600 MHz,  $\text{CDCl}_3$ ):  $\delta$  8.24 (d,  $J = 8.4$  Hz, 1H), 7.80-7.77 (m, 2H), 7.59 (td,  $J_1 = 8.4$  Hz,  $J_2 = 0.6$  Hz, 1H), 7.11 (d,  $J$

= 1.8 Hz, 1H), 7.09 (d,  $J = 8.4$  Hz, 1H), 7.05 (dd,  $J_1 = 7.8$  Hz,  $J_2 = 1.8$  Hz, 1H), 6.89 (dd,  $J_1 = 8.4$  Hz,  $J_2 = 1.8$  Hz, 1H), 6.78 (d,  $J = 8.4$  Hz, 1H), 6.67 (d,  $J = 1.8$  Hz, 1H), 4.00 (s, 3H), 3.89 (s, 3H), 3.88 (s, 3H), 3.85 (s, 3H).  $^{13}\text{C}\{^1\text{H}\}$  NMR (150 MHz,  $\text{CDCl}_3$ ):  $\delta$  152.7, 150.1, 149.4, 148.8, 148.7, 147.0 (q,  $^2J_{\text{C-F}} = 32.3$  Hz), 145.0, 130.6, 130.5, 129.1, 128.3, 127.7, 126.4, 124.9, 122.9, 121.6 (q,  $^1J_{\text{C-F}} = 275.1$  Hz), 114.7, 114.0, 113.9, 113.5, 111.0, 110.8, 100.5, 82.5, 56.1, 56.0, 55.9, 55.8.  $^{19}\text{F}$  NMR (565 MHz,  $\text{CDCl}_3$ ):  $\delta$  -66.16 (s). HRMS (ESI)  $m/z$ :  $[\text{M}+\text{H}]^+$  Calcd for  $\text{C}_{28}\text{H}_{23}\text{F}_3\text{NO}_4$  494.1574; Found 494.1578.

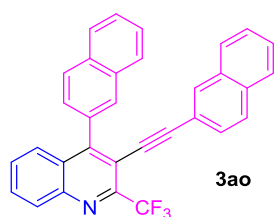

#### 4-(Naphthalen-2-yl)-3-(naphthalen-2-ylethynyl)-2-(trifluoromethyl)quinoline (3ao)

Eluent: petroleum ether/ethyl acetate (100:1). Yellow solid (43.8 mg, 46%), mp 203.9-204.8 °C.  $^1\text{H}$  NMR (400 MHz,  $\text{CDCl}_3$ ):  $\delta$  8.29 (d,  $J = 8.8$  Hz, 1H), 8.08 (d,  $J = 8.4$  Hz, 1H), 8.06 (s, 1H), 8.03 (d,  $J = 8.0$  Hz, 1H), 7.96 (d,  $J = 8.0$  Hz, 1H), 7.82-7.78 (m, 1H), 7.75 (d,  $J = 8.4$  Hz, 1H), 7.70-7.52 (m, 7H), 7.47 (s, 1H), 7.42-7.40 (m, 2H), 7.08 (dd,  $J_1 = 8.4$  Hz,  $J_2 = 1.6$  Hz, 1H).  $^{13}\text{C}\{^1\text{H}\}$  NMR (100 MHz,  $\text{CDCl}_3$ ):  $\delta$  153.4, 147.3 (q,  $^2J_{\text{C-F}} = 32.3$  Hz), 145.1, 133.34, 133.30, 133.1, 133.0, 132.7, 131.8, 130.9, 130.6, 129.7, 129.3, 128.4, 128.1, 128.0, 127.95, 127.86, 127.73, 127.70, 127.6, 127.1, 127.0, 126.8, 126.6, 126.5, 121.7 (q,  $^1J_{\text{C-F}} = 275.6$  Hz), 119.7, 113.9, 100.8, 83.9.  $^{19}\text{F}$  NMR (376 MHz,  $\text{CDCl}_3$ ):  $\delta$  -65.99 (s). HRMS (ESI)  $m/z$ :  $[\text{M}+\text{H}]^+$  Calcd for  $\text{C}_{32}\text{H}_{19}\text{F}_3\text{N}$  474.1464; Found 474.1447.

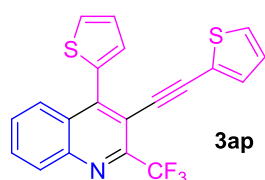

#### 4-(Thiophen-2-yl)-3-(thiophen-2-ylethynyl)-2-(trifluoromethyl)quinoline (3ap)

Eluent: petroleum ether/ethyl acetate (100:1). Yellow solid (42.7 mg, 55%), mp 128.6-129.2 °C.  $^1\text{H}$  NMR (400 MHz,  $\text{CDCl}_3$ ):  $\delta$  8.22 (d,  $J = 8.4$  Hz, 1H), 7.94 (d,  $J = 8.4$  Hz, 1H), 7.81-7.77 (m, 1H), 7.66-7.60 (m, 2H),

7.32-7.27 (m, 3H), 7.17 (dd,  $J_1 = 3.6$  Hz,  $J_2 = 0.8$  Hz, 1H), 6.98 (dd,  $J_1 = 5.2$  Hz,  $J_2 = 3.6$  Hz, 1H).  $^{13}\text{C}\{^1\text{H}\}$  NMR (150 MHz,  $\text{CDCl}_3$ ):  $\delta$  146.8 (q,  $^2J_{\text{C-F}} = 32.6$  Hz), 145.9, 144.9, 135.0, 132.9, 131.0, 130.5, 130.3, 129.5, 128.8, 128.09, 128.06, 127.3, 127.2, 126.2, 122.4, 121.4 (q,  $^1J_{\text{C-F}} = 274.2$  Hz), 114.5, 94.4, 87.1.  $^{19}\text{F}$  NMR (565 MHz,  $\text{CDCl}_3$ ):  $\delta$  -66.27 (s). HRMS (ESI)  $m/z$ :  $[\text{M}+\text{H}]^+$  Calcd for  $\text{C}_{20}\text{H}_{11}\text{F}_3\text{NS}_2$  386.0280; Found 386.0284.

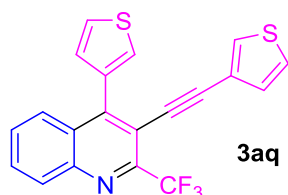

#### 4-(Thiophen-3-yl)-3-(thiophen-3-ylethynyl)-2-(trifluoromethyl)quinoline (3aq)

Eluent: petroleum ether/ethyl acetate (100:1). White solid (40.2 mg, 52%), mp 153.7-154.4 °C.  $^1\text{H}$  NMR (600 MHz,  $\text{CDCl}_3$ ):  $\delta$  8.23 (d,  $J = 8.4$  Hz, 1H), 7.85 (d,  $J = 8.4$  Hz, 1H), 7.80-7.78 (m, 1H), 7.62-7.59 (m, 2H), 7.56 (dd,  $J_1 = 4.8$  Hz,  $J_2 = 3.0$  Hz, 1H), 7.39 (dd,  $J_1 = 3.0$  Hz,  $J_2 = 1.2$  Hz, 1H), 7.34 (dd,  $J_1 = 4.8$  Hz,  $J_2 = 1.2$  Hz, 1H), 7.26 (dd,  $J_1 = 4.8$  Hz,  $J_2 = 2.4$  Hz, 1H), 7.01 (dd,  $J_1 = 5.4$  Hz,  $J_2 = 1.2$  Hz, 1H).  $^{13}\text{C}\{^1\text{H}\}$  NMR (150 MHz,  $\text{CDCl}_3$ ):  $\delta$  148.4, 147.2 (q,  $^2J_{\text{C-F}} = 32.1$  Hz), 145.0, 135.4, 130.8, 130.5, 129.7, 129.6, 129.2, 127.7, 126.7, 126.2, 125.61, 125.56, 121.7, 121.5 (q,  $^1J_{\text{C-F}} = 275.7$  Hz), 113.8, 95.3, 83.0.  $^{19}\text{F}$  NMR (565 MHz,  $\text{CDCl}_3$ ):  $\delta$  -66.27 (s). HRMS (ESI)  $m/z$ :  $[\text{M}+\text{H}]^+$  Calcd for  $\text{C}_{20}\text{H}_{11}\text{F}_3\text{NS}_2$  386.0280; Found 386.0266.

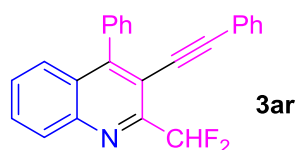

#### 2-(Difluoromethyl)-4-phenyl-3-(phenylethynyl)quinoline (3ar)

Eluent: petroleum ether/ethyl acetate (100:1). Yellow solid (18.5 mg, 26%), mp 203.9-204.8 °C.  $^1\text{H}$  NMR (400 MHz,  $\text{CDCl}_3$ ):  $\delta$  8.24 (d,  $J = 8.4$  Hz, 1H), 7.79-7.75 (m, 1H), 7.69 (d,  $J = 8.4$  Hz, 1H), 7.60-7.53 (m, 4H), 7.51-7.49 (m, 2H), 7.31-7.21 (m, 5H), 7.19 (t,  $J = 54.4$  Hz, 1H).  $^{13}\text{C}\{^1\text{H}\}$  NMR (150 MHz,  $\text{CDCl}_3$ ):  $\delta$  152.5, 151.2 (t,  $^2J_{\text{C-F}} = 22.5$  Hz), 146.0, 135.9, 131.5, 130.5, 130.3, 130.0, 128.9, 128.8, 128.5, 128.4, 128.3, 127.3,

126.4, 122.5, 114.2, 113.6 (t,  $^1J_{\text{C-F}} = 240.0$  Hz), 99.8, 83.5.  $^{19}\text{F}$  NMR (565 MHz,  $\text{CDCl}_3$ ):  $\delta$  -116.64 (d,  $J = 55.4$  Hz). HRMS (ESI)  $m/z$ :  $[\text{M}+\text{H}]^+$  Calcd for  $\text{C}_{24}\text{H}_{16}\text{F}_2\text{N}$  356.1245; Found 356.1238.

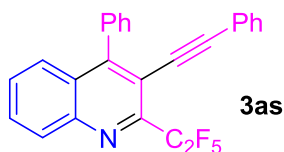

### 2-(Perfluoroethyl)-4-phenyl-3-(phenylethynyl)quinoline (3as)

Eluent: petroleum ether/ethyl acetate (100:1). Yellow solid (29.9 mg, 35%), mp 144.9-145.6 °C.  $^1\text{H}$  NMR (600 MHz,  $\text{CDCl}_3$ ):  $\delta$  8.24 (d,  $J = 8.4$  Hz, 1H), 7.80-7.77 (m, 1H), 7.66 (d,  $J = 7.8$  Hz, 1H), 7.61-7.57 (m, 4H), 7.49-7.47 (m, 2H), 7.31-7.25 (m, 3H), 7.17-7.15 (m, 2H).  $^{13}\text{C}\{^1\text{H}\}$  NMR (150 MHz,  $\text{CDCl}_3$ ):  $\delta$  153.6, 146.8 (t,  $^2J_{\text{C-F}} = 25.5$  Hz), 145.1, 135.9, 131.5, 130.7, 130.6, 130.0, 129.2, 128.85, 128.76, 128.33, 128.29, 127.2, 126.4, 122.6, 119.4 (qt,  $^1J_{\text{C-F}} = 285.6$  Hz,  $^2J_{\text{C-F}} = 36.5$  Hz), 114.6, 112.4 (tq,  $^1J_{\text{C-F}} = 256.2$  Hz,  $^2J_{\text{C-F}} = 35.4$  Hz), 100.1, 83.5.  $^{19}\text{F}$  NMR (565 MHz,  $\text{CDCl}_3$ ):  $\delta$  -80.80 (s), -110.88 (s). HRMS (ESI)  $m/z$ :  $[\text{M}+\text{H}]^+$  Calcd for  $\text{C}_{25}\text{H}_{15}\text{F}_5\text{N}$  424.1119; Found 424.1132.

## 2. Typical procedure for the synthesis of 4a and spectroscopic data of 4a-4l<sup>[5]</sup>

To a reaction tube equipped with a stir bar were added **3aa** (74.7 mg, 0.2 mmol), *p*-TsOH  $\text{H}_2\text{O}$  (1.14 g, 6.0 mmol). The tube was then sealed, and the mixture was stirred at 120 °C (oil bath) under air for 24 h. Upon completion, the resulting mixture was cooled to room temperature, neutralized with saturated aqueous solution of  $\text{NaHCO}_3$  and extracted with ethyl acetate (10 mL  $\times$  3). The combined organic phases were dried over  $\text{Na}_2\text{SO}_4$ , filtered through a pad of celite and concentrated under reduced pressure. The residue was purified by silica gel column chromatography (petroleum ether/ethyl acetate = 100:1) to give product **4a**. Other products **4b-4l** were obtained in a similar manner.

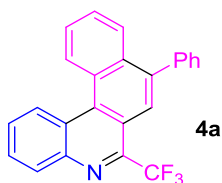



### 8-Phenyl-6-(trifluoromethyl)benzo[*k*]phenanthridine (4a)

Eluent: petroleum ether/ethyl acetate (100:1). White solid (66.7 mg, 89%), mp 180.0-180.6 °C. <sup>1</sup>H NMR (600 MHz, CDCl<sub>3</sub>): δ 8.96 (d, *J* = 8.4 Hz, 1H), 8.86 (d, *J* = 7.8 Hz, 1H), 8.27 (dd, *J*<sub>1</sub> = 7.8 Hz, *J*<sub>2</sub> = 1.2 Hz, 1H), 8.06 (q, *J* = 1.8 Hz, 1H), 7.95 (dd, *J*<sub>1</sub> = 8.4 Hz, *J*<sub>2</sub> = 0.6 Hz, 1H), 7.71 (td, *J*<sub>1</sub> = 6.6 Hz, *J*<sub>2</sub> = 1.2 Hz, 1H), 7.67 (td, *J*<sub>1</sub> = 7.8 Hz, *J*<sub>2</sub> = 1.2 Hz, 1H), 7.60 (td, *J*<sub>1</sub> = 7.2 Hz, *J*<sub>2</sub> = 1.2 Hz, 1H), 7.56-7.54 (m, 1H), 7.48-7.43 (m, 4H), 7.40-7.37 (m, 1H). <sup>13</sup>C{<sup>1</sup>H} NMR (150 MHz, CDCl<sub>3</sub>): δ 145.7 (q, <sup>2</sup>*J*<sub>C-F</sub> = 31.5 Hz), 143.8, 141.0, 139.7, 133.6, 133.2, 131.0, 130.0, 129.2, 129.0, 128.9, 128.8, 128.7, 128.1, 127.2, 127.07, 127.06, 125.1, 122.3 (q, <sup>1</sup>*J*<sub>C-F</sub> = 275.9 Hz), 121.7 (q, <sup>4</sup>*J*<sub>C-F</sub> = 3.2 Hz), 120.6. <sup>19</sup>F NMR (565 MHz, CDCl<sub>3</sub>): δ -62.36 (s). HRMS (ESI) *m/z*: [M+H]<sup>+</sup> Calcd for C<sub>24</sub>H<sub>15</sub>F<sub>3</sub>N 374.1151; Found 374.1141.

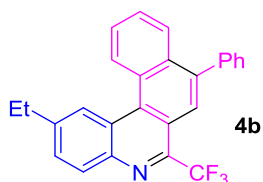

### 2-Ethyl-8-phenyl-6-(trifluoromethyl)benzo[*k*]phenanthridine (4b)

Eluent: petroleum ether/ethyl acetate (100:1). Colorless oil (69.6 mg, 87%). <sup>1</sup>H NMR (400 MHz, CDCl<sub>3</sub>): δ 9.05 (d, *J* = 8.4 Hz, 1H), 8.75 (s, 1H), 8.24 (d, *J* = 8.4 Hz, 1H), 8.08 (q, *J* = 2.4 Hz, 1H), 8.00 (dd, *J*<sub>1</sub> = 8.0 Hz, *J*<sub>2</sub> = 0.4 Hz, 1H), 7.70-7.66 (m, 1H), 7.64-7.58 (m, 2H), 7.52-7.45 (m, 4H), 7.44-7.40 (m, 1H), 2.90 (q, *J* = 7.6 Hz, 2H), 1.33 (t, *J* = 7.6 Hz, 3H). <sup>13</sup>C{<sup>1</sup>H} NMR (150 MHz, CDCl<sub>3</sub>): δ 144.3, 143.8 (q, <sup>2</sup>*J*<sub>C-F</sub> = 32.0 Hz), 141.4, 139.7, 138.7, 132.5, 131.9, 129.7, 128.9, 128.8, 128.3, 127.8, 127.6, 127.5, 127.0, 126.0, 125.9, 124.4, 124.1, 121.4 (q, <sup>1</sup>*J*<sub>C-F</sub> = 275.4 Hz), 120.7 (q, <sup>4</sup>*J*<sub>C-F</sub> = 2.9 Hz), 119.6, 28.5, 14.6. <sup>19</sup>F NMR (376 MHz, CDCl<sub>3</sub>): δ -62.31 (d, *J* = 2.6 Hz). HRMS (ESI) *m/z*: [M+H]<sup>+</sup> Calcd for C<sub>26</sub>H<sub>19</sub>F<sub>3</sub>N 402.1464; Found 402.1478.

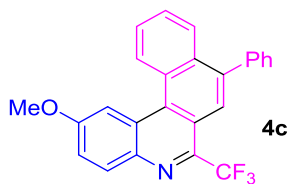

### 2-Methoxy-8-phenyl-6-(trifluoromethyl)benzo[*k*]phenanthridine (4c)

Eluent: petroleum ether/ethyl acetate (50:1). White solid (54.5 mg, 68%), mp 124.5-125.3 °C.  $^1\text{H}$  NMR (400 MHz,  $\text{CDCl}_3$ ):  $\delta$  9.22 (d,  $J = 8.4$  Hz, 1H), 8.46 (d,  $J = 2.8$  Hz, 1H), 8.33 (d,  $J = 9.2$  Hz, 1H), 8.16 (q,  $J = 2.0$  Hz, 1H), 8.10 (dd,  $J_1 = 8.4$  Hz,  $J_2 = 0.8$  Hz, 1H), 7.79-7.74 (m, 1H), 7.72-7.68 (m, 1H), 7.62-7.56 (m, 4H), 7.54-7.50 (m, 2H), 4.06 (s, 3H).  $^{13}\text{C}\{^1\text{H}\}$  NMR (150 MHz,  $\text{CDCl}_3$ ):  $\delta$  160.0, 143.3 (q,  $^2J_{\text{C-F}} = 30.8$  Hz), 141.0, 139.7, 139.4, 133.5, 132.5, 132.2, 130.0, 129.5, 128.7, 128.5, 128.05, 128.01, 127.2, 126.9, 126.5, 122.5 (q,  $^1J_{\text{C-F}} = 274.2$  Hz), 121.8 (q,  $^4J_{\text{C-F}} = 3.0$  Hz), 121.0, 119.4, 107.9, 55.9.  $^{19}\text{F}$  NMR (376 MHz,  $\text{CDCl}_3$ ):  $\delta$  -62.21 (d,  $J = 2.6$  Hz). HRMS (ESI)  $m/z$ :  $[\text{M}+\text{H}]^+$  Calcd for  $\text{C}_{25}\text{H}_{17}\text{F}_3\text{NO}$  404.1257; Found 404.1266.

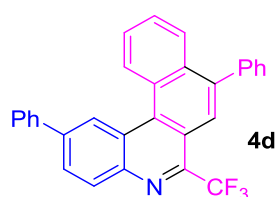

#### 2,8-Diphenyl-6-(trifluoromethyl)benzo[*k*]phenanthridine (4d)

Eluent: petroleum ether/ethyl acetate (100:1). White solid (63.5 mg, 71%), mp 187.2-187.7 °C.  $^1\text{H}$  NMR (400 MHz,  $\text{CDCl}_3$ ):  $\delta$  9.23 (d,  $J = 1.6$  Hz, 1H), 9.20 (d,  $J = 8.4$  Hz, 1H), 8.48 (d,  $J = 8.4$  Hz, 1H), 8.20 (q,  $J = 2.0$  Hz, 1H), 8.11 (dd,  $J_1 = 8.4$  Hz,  $J_2 = 2.0$  Hz, 2H), 7.81-7.77 (m, 3H), 7.74-7.70 (m, 1H), 7.63-7.53 (m, 7H), 7.46 (t,  $J = 7.2$  Hz, 1H).  $^{13}\text{C}\{^1\text{H}\}$  NMR (150 MHz,  $\text{CDCl}_3$ ):  $\delta$  145.5 (q,  $^2J_{\text{C-F}} = 33.2$  Hz), 143.1, 141.7, 141.1, 140.5, 139.7, 133.7, 133.3, 131.3, 130.0, 129.3, 129.2, 128.8, 128.73, 128.71, 128.5, 128.14, 128.09, 127.7, 127.24, 127.19, 125.43, 125.41, 122.3 (q,  $^1J_{\text{C-F}} = 276.3$  Hz), 121.7 (q,  $^4J_{\text{C-F}} = 2.6$  Hz), 120.9.  $^{19}\text{F}$  NMR (376 MHz,  $\text{CDCl}_3$ ):  $\delta$  -62.40 (d,  $J = 2.6$  Hz). HRMS (ESI)  $m/z$ :  $[\text{M}+\text{H}]^+$  Calcd for  $\text{C}_{30}\text{H}_{19}\text{F}_3\text{N}$  450.1464; Found 450.1477.

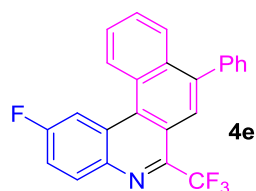

#### 2-Fluoro-8-phenyl-6-(trifluoromethyl)benzo[*k*]phenanthridine (4e)

Eluent: petroleum ether/ethyl acetate (100:1). White solid (64.8 mg, 83%), mp 189.8-190.5 °C.  $^1\text{H}$  NMR (400 MHz,  $\text{CDCl}_3$ ):  $\delta$  9.05 (d,  $J = 8.4$  Hz, 1H), 8.68 (dd,  $J_1 = 10.8$  Hz,  $J_2 = 2.8$  Hz, 1H), 8.39 (dd,  $J_1 = 8.8$  Hz,  $J_2 = 5.6$  Hz, 1H), 8.17 (q,  $J = 2.0$  Hz, 1H), 8.09 (d,  $J = 8.4$  Hz, 1H), 7.80-7.76 (m, 1H), 7.73-7.69 (m, 1H), 7.62-7.53 (m, 6H).  $^{13}\text{C}\{^1\text{H}\}$  NMR (150 MHz,  $\text{CDCl}_3$ ):  $\delta$  162.5 (d,  $^1J_{\text{C-F}} = 274.7$  Hz), 145.1 (q,  $^2J_{\text{C-F}} = 32.7$  Hz), 141.8, 140.7, 139.5, 133.5 (d,  $^3J_{\text{C-F}} = 8.9$  Hz), 133.4, 132.5 (d,  $^4J_{\text{C-F}} = 4.4$  Hz), 130.0, 129.2, 128.8, 128.7, 128.2, 128.1, 127.5, 127.3, 126.3 (d,  $^3J_{\text{C-F}} = 10.2$  Hz), 122.2 (q,  $^1J_{\text{C-F}} = 275.6$  Hz), 121.6 (q,  $^4J_{\text{C-F}} = 3.3$  Hz), 120.9, 118.4 (d,  $^2J_{\text{C-F}} = 24.8$  Hz), 111.8 (d,  $^2J_{\text{C-F}} = 25.2$  Hz).  $^{19}\text{F}$  NMR (376 MHz,  $\text{CDCl}_3$ ):  $\delta$  -62.50 (s), -109.38 – -109.45 (m). HRMS (ESI)  $m/z$ :  $[\text{M}+\text{H}]^+$  Calcd for  $\text{C}_{24}\text{H}_{14}\text{F}_4\text{N}$  392.1057; Found 392.1060.

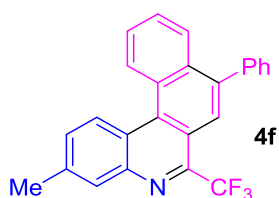

### 3-Methyl-8-phenyl-6-(trifluoromethyl)benzo[*k*]phenanthridine (4f)

Eluent: petroleum ether/ethyl acetate (100:1). White solid (42.6 mg, 55%), mp 199.2-199.9 °C.  $^1\text{H}$  NMR (400 MHz,  $\text{CDCl}_3$ ):  $\delta$  9.11 (d,  $J = 8.4$  Hz, 1H), 8.91 (d,  $J = 8.4$  Hz, 1H), 8.20 (s, 1H), 8.16 (q,  $J = 2.0$  Hz, 1H), 8.08 (d,  $J = 8.0$  Hz, 1H), 7.77-7.72 (m, 1H), 7.70-7.63 (m, 2H), 7.60-7.51 (m, 5H), 2.65 (s, 3H).  $^{13}\text{C}\{^1\text{H}\}$  NMR (150 MHz,  $\text{CDCl}_3$ ):  $\delta$  145.6 (q,  $^2J_{\text{C-F}} = 32.1$  Hz), 144.0, 140.5, 139.8, 139.5, 133.6, 133.3, 130.8, 130.3, 130.0, 129.2, 128.9, 128.7, 128.6, 128.0, 127.03, 126.96, 126.9, 123.0, 122.4 (q,  $^1J_{\text{C-F}} = 275.9$  Hz), 121.8 (q,  $^4J_{\text{C-F}} = 3.2$  Hz), 120.2, 21.4.  $^{19}\text{F}$  NMR (376 MHz,  $\text{CDCl}_3$ ):  $\delta$  -62.42 (s). HRMS (ESI)  $m/z$ :  $[\text{M}+\text{H}]^+$  Calcd for  $\text{C}_{25}\text{H}_{17}\text{F}_3\text{N}$  388.1308; Found 388.1300.

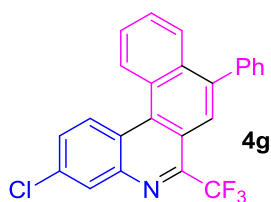

### 3-Chloro-8-phenyl-6-(trifluoromethyl)benzo[*k*]phenanthridine (4g)

Eluent: petroleum ether/ethyl acetate (100:1). Yellowish solid (69.1 mg, 85%), mp 216.9-217.5 °C.  $^1\text{H}$  NMR (600 MHz,  $\text{CDCl}_3$ ):  $\delta$  9.03 (d,  $J = 8.4$  Hz, 1H), 8.96 (d,  $J = 9.0$  Hz, 1H), 8.40 (d,  $J = 2.4$  Hz, 1H), 8.16 (q,  $J = 1.2$  Hz, 1H), 8.10 (d,  $J = 8.4$  Hz, 1H), 7.80-7.76 (m, 2H), 7.74-7.71 (m, 1H), 7.59-7.56 (m, 4H), 7.54-7.51 (m, 1H).  $^{13}\text{C}\{^1\text{H}\}$  NMR (150 MHz,  $\text{CDCl}_3$ ):  $\delta$  146.8 (q,  $^2J_{\text{C-F}} = 32.9$  Hz), 144.4, 141.4, 139.5, 134.8, 133.8, 133.1, 130.0, 129.9, 129.4, 129.01, 128.98, 128.7, 128.6, 128.5, 128.2, 127.35, 127.25, 123.6, 122.1 (q,  $^1J_{\text{C-F}} = 275.3$  Hz), 121.6 (q,  $^4J_{\text{C-F}} = 2.9$  Hz), 120.6.  $^{19}\text{F}$  NMR (565 MHz,  $\text{CDCl}_3$ ):  $\delta$  -62.63 (s). HRMS (ESI)  $m/z$ :  $[\text{M}+\text{H}]^+$  Calcd for  $\text{C}_{24}\text{H}_{14}\text{ClF}_3\text{N}$  408.0761; Found 408.0758.

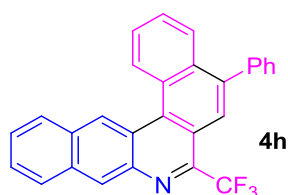

#### 5-Phenyl-7-(trifluoromethyl)dibenzo[*b,k*]phenanthridine (4h)

Eluent: petroleum ether/ethyl acetate (100:1). Yellow solid (73.5 mg, 87%), mp 192.8-193.7 °C.  $^1\text{H}$  NMR (400 MHz,  $\text{CDCl}_3$ ):  $\delta$  9.50 (s, 1H), 9.28 (d,  $J = 8.4$  Hz, 1H), 8.92 (s, 1H), 8.19-8.11 (m, 4H), 7.83-7.78 (m, 1H), 7.73-6.92 (m, 1H), 7.66-7.52 (m, 7H).  $^{13}\text{C}\{^1\text{H}\}$  NMR (150 MHz,  $\text{CDCl}_3$ ):  $\delta$  146.8 (q,  $^2J_{\text{C-F}} = 31.2$  Hz), 140.9, 140.8, 139.8, 133.8, 133.0, 132.9, 132.8, 130.1, 129.6, 129.3, 128.7, 128.58, 128.56, 128.52, 128.47, 128.1, 127.3, 127.13, 127.11, 127.0, 123.0, 122.12 (q,  $^1J_{\text{C-F}} = 275.7$  Hz), 122.08 (q,  $^4J_{\text{C-F}} = 3.5$  Hz), 119.8.  $^{19}\text{F}$  NMR (376 MHz,  $\text{CDCl}_3$ ):  $\delta$  -62.97 (s). HRMS (ESI)  $m/z$ :  $[\text{M}+\text{H}]^+$  Calcd for  $\text{C}_{28}\text{H}_{17}\text{F}_3\text{N}$  424.1308; Found 424.1298.

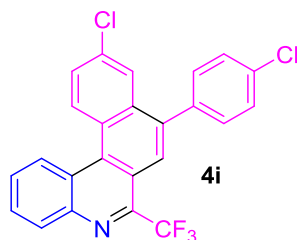

#### 10-Chloro-8-(4-chlorophenyl)-6-(trifluoromethyl)benzo[*k*]phenanthridine (4i)

Eluent: petroleum ether/ethyl acetate (100:1). White solid (48.6 mg, 55%), mp 229.2-229.8 °C.  $^1\text{H}$  NMR (600 MHz,  $\text{CDCl}_3$ ):  $\delta$  9.05 (d,  $J = 9.0$  Hz, 1H), 8.92 (d,  $J = 8.4$  Hz, 1H), 8.41 (dd,  $J_1 = 7.8$  Hz,  $J_2 = 1.2$  Hz, 1H), 8.17 (q,  $J = 1.2$  Hz, 1H), 7.99 (d,  $J = 2.4$  Hz, 1H), 7.89 (td,  $J_1 = 6.6$  Hz,  $J_2 = 1.2$  Hz, 1H), 7.86-7.84 (m, 1H), 7.72 (dd,  $J_1 = 9.0$  Hz,  $J_2 = 2.4$  Hz, 1H), 7.57 (d,  $J = 8.4$  Hz, 2H), 7.51 (d,  $J = 7.8$  Hz, 2H).  $^{13}\text{C}\{^1\text{H}\}$  NMR (150 MHz,  $\text{CDCl}_3$ ):  $\delta$  145.6 (q,  $^2J_{\text{C-F}} = 33.2$  Hz), 144.0, 138.8, 137.4, 135.3, 134.6, 134.5, 133.1, 131.20, 131.16, 130.5, 129.5, 129.2, 127.8, 127.6, 127.0, 125.8, 124.7, 123.0 (q,  $^4J_{\text{C-F}} = 3.0$  Hz), 122.1 (q,  $^1J_{\text{C-F}} = 275.6$  Hz), 120.4.  $^{19}\text{F}$  NMR (565 MHz,  $\text{CDCl}_3$ ):  $\delta$  -62.43 (s). HRMS (ESI)  $m/z$ :  $[\text{M}+\text{H}]^+$  Calcd for  $\text{C}_{24}\text{H}_{13}\text{Cl}_2\text{F}_3\text{N}$  442.0372; Found 442.0366.

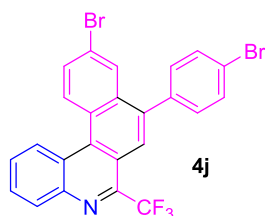

#### 10-Bromo-8-(4-bromophenyl)-6-(trifluoromethyl)benzo[*k*]phenanthridine (4j)

Eluent: petroleum ether/ethyl acetate (100:1). Yellowish solid (60.5 mg, 57%), mp 241.3-242.0 °C.  $^1\text{H}$  NMR (400 MHz,  $\text{CDCl}_3$ ):  $\delta$  8.97 (d,  $J = 9.2$  Hz, 1H), 8.91 (d,  $J = 8.0$  Hz, 1H), 8.40 (dd,  $J_1 = 8.0$  Hz,  $J_2 = 1.2$  Hz, 1H), 8.151-8.147 (m, 2H), 7.90-7.82 (m, 3H), 7.73 (d,  $J = 8.4$  Hz, 2H), 7.45 (d,  $J = 8.4$  Hz, 2H).  $^{13}\text{C}\{^1\text{H}\}$  NMR (150 MHz,  $\text{CDCl}_3$ ):  $\delta$  145.6 (q,  $^2J_{\text{C-F}} = 33.2$  Hz), 144.0, 138.7, 137.8, 134.7, 133.2, 132.2, 131.5, 131.2, 130.6, 130.5, 129.5, 129.2, 129.0, 127.9, 126.9, 124.6, 123.7, 123.0 (q,  $^4J_{\text{C-F}} = 3.2$  Hz), 122.8, 122.1 (q,  $^1J_{\text{C-F}} = 276.3$  Hz), 120.4.  $^{19}\text{F}$  NMR (376 MHz,  $\text{CDCl}_3$ ):  $\delta$  -62.42 (s). HRMS (ESI)  $m/z$ :  $[\text{M}+\text{H}]^+$  Calcd for  $\text{C}_{24}\text{H}_{13}\text{Br}_2\text{F}_3\text{N}$  529.9361; Found 529.9374.

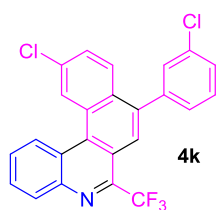

#### 11-Chloro-8-(3-chlorophenyl)-6-(trifluoromethyl)benzo[*k*]phenanthridine (4k)

Eluent: petroleum ether/ethyl acetate (100:1). White solid (39.7 mg, 45%), mp 133.9-134.6 °C.  $^1\text{H}$  NMR (400 MHz,  $\text{CDCl}_3$ ):  $\delta$  9.12 (d,  $J = 2.0$  Hz, 1H), 8.99-8.95 (m, 1H), 8.44-8.42 (m, 1H), 8.15 (q,  $J = 2.0$  Hz, 1H), 7.98 (d,  $J = 8.8$  Hz, 1H), 7.93-7.88 (m, 2H), 7.68 (dd,  $J_1 = 9.2$  Hz,  $J_2 = 2.4$  Hz, 1H), 7.56 (d,  $J = 0.8$  Hz, 1H), 7.52-7.51 (m, 2H), 7.47-7.44 (m, 1H).  $^{13}\text{C}\{^1\text{H}\}$  NMR (100 MHz,  $\text{CDCl}_3$ ):  $\delta$  145.6 (q,  $^2J_{\text{C-F}} = 32.9$  Hz), 143.9, 141.0, 139.2, 134.8, 133.9, 132.4, 131.6, 131.2, 130.2, 130.1, 129.9, 129.5, 129.4, 128.5, 128.4, 128.13, 128.07, 126.7, 124.7, 122.14 (q,  $^4J_{\text{C-F}} = 3.4$  Hz), 122.11 (q,  $^1J_{\text{C-F}} = 275.5$  Hz), 120.9.  $^{19}\text{F}$  NMR (376 MHz,  $\text{CDCl}_3$ ):  $\delta$  -62.47 (d,  $J = 2.6$  Hz). HRMS (ESI)  $m/z$ :  $[\text{M}+\text{H}]^+$  Calcd for  $\text{C}_{24}\text{H}_{13}\text{Cl}_2\text{F}_3\text{N}$  442.0372; Found 442.0376.

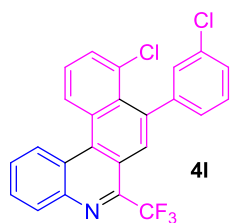

#### 9-Chloro-8-(3-chlorophenyl)-6-(trifluoromethyl)benzo[k]phenanthridine (41)

Eluent: petroleum ether/ethyl acetate (100:1). White solid (29.1 mg, 33%), mp 180.2-180.8 °C.  $^1\text{H}$  NMR (400 MHz,  $\text{CDCl}_3$ ):  $\delta$  9.04 (d,  $J = 8.4$  Hz, 1H), 8.91 (d,  $J = 7.6$  Hz, 1H), 8.42 (dd,  $J_1 = 8.4$  Hz,  $J_2 = 1.6$  Hz, 1H), 8.12 (q,  $J = 1.6$  Hz, 1H), 7.91-7.83 (m, 2H), 7.80 (dd,  $J_1 = 7.6$  Hz,  $J_2 = 0.8$  Hz, 1H), 7.68 (t,  $J = 8.0$  Hz, 1H), 7.43-7.38 (m, 3H), 7.35-7.32 (m, 1H).  $^{13}\text{C}\{^1\text{H}\}$  NMR (100 MHz,  $\text{CDCl}_3$ ):  $\delta$  145.3 (q,  $^2J_{\text{C-F}} = 32.8$  Hz), 144.3, 144.2, 137.8, 133.9, 133.8, 132.35, 132.31, 131.7, 131.1, 130.1, 129.5, 129.3, 129.24, 129.15, 128.5, 127.6, 127.4, 127.1, 125.8 (q,  $^4J_{\text{C-F}} = 3.3$  Hz), 124.7, 122.0 (q,  $^1J_{\text{C-F}} = 275.4$  Hz), 119.8.  $^{19}\text{F}$  NMR (376 MHz,  $\text{CDCl}_3$ ):  $\delta$  -62.54 (s). HRMS (ESI)  $m/z$ :  $[\text{M}+\text{H}]^+$  Calcd for  $\text{C}_{24}\text{H}_{13}\text{Cl}_2\text{F}_3\text{N}$  442.0372; Found 442.0364.

### III. Mechanistic studies

#### 1. Studies on the reversibility of C–H bond activation

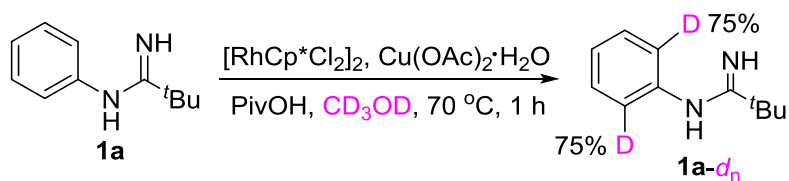

To a reaction tube equipped with a stir bar were added **1a** (35.3 mg, 0.2 mmol),  $[\text{RhCp}^*\text{Cl}_2]_2$  (3.7 mg, 0.006 mmol),  $\text{Cu(OAc)}_2\cdot\text{H}_2\text{O}$  (40.0 mg, 0.2 mmol), PivOH (20.4 mg, 0.2 mmol) and  $\text{CD}_3\text{OD}$  (2.2 mL). The tube was then sealed, and the mixture was stirred at 70 °C (oil bath) under air for 1 h. It was then cooled to room temperature, filtered through a pad of celite and concentrated under reduced pressure. The residue was purified by silica gel column chromatography using dichloromethane/methanol (10:1) as eluent to afford **1a** and **1a-d<sub>n</sub>**. Upon analyzing the  $^1\text{H}$  NMR spectrum of the mixture, the deuteration percentage was determined as 75%.

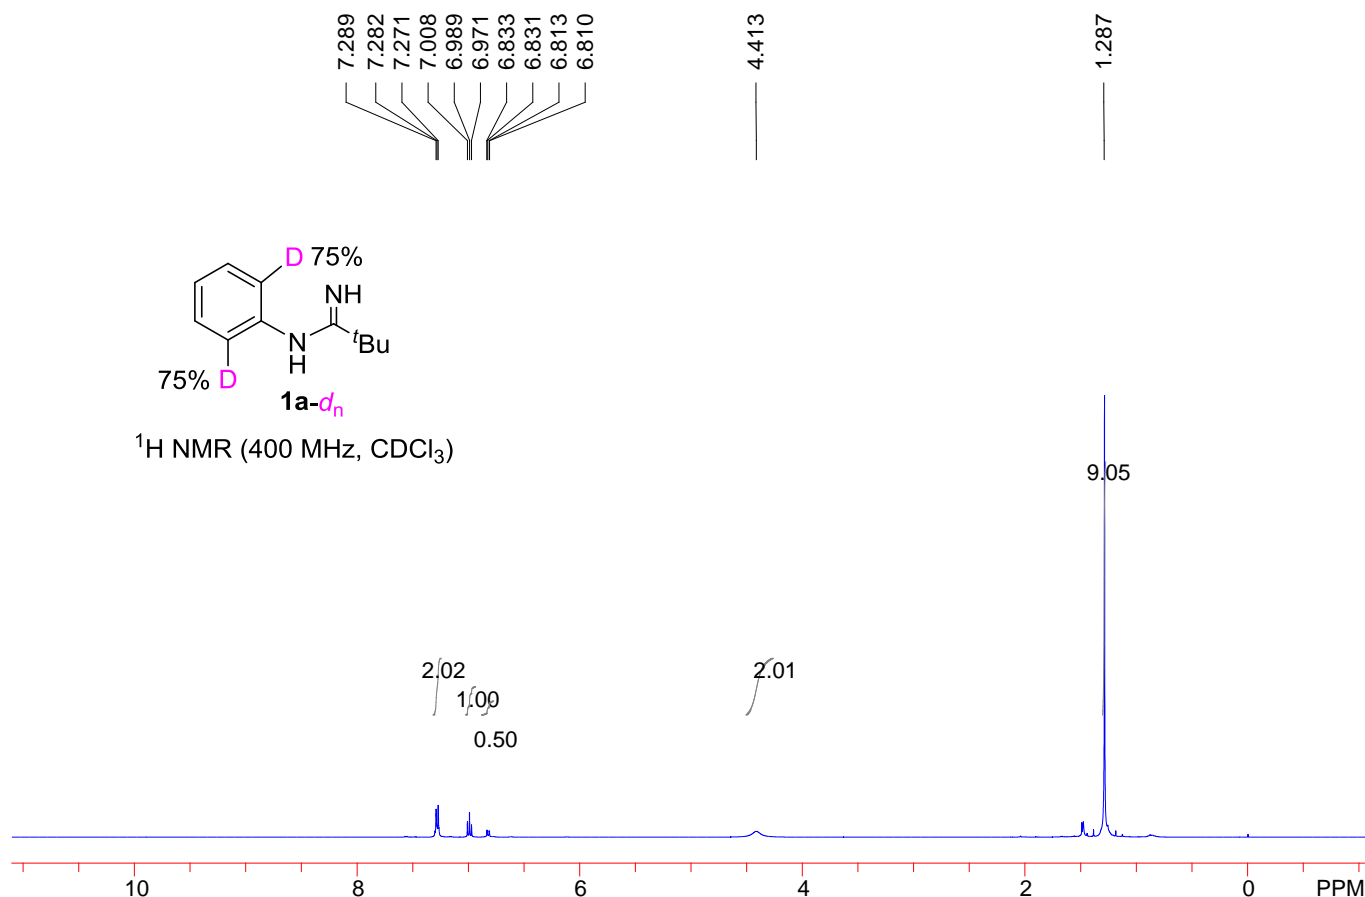

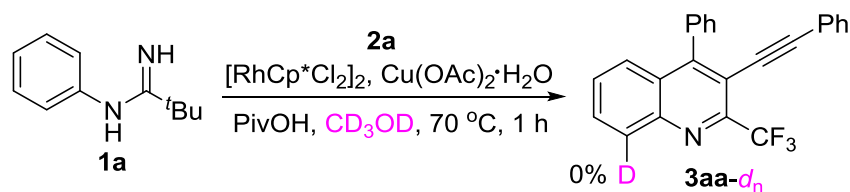

To a reaction tube equipped with a stir bar were added **1a** (35.3 mg, 0.2 mmol),  $[\text{RhCp}^*\text{Cl}_2]_2$  (3.7 mg, 0.006 mmol),  $\text{Cu}(\text{OAc})_2 \cdot \text{H}_2\text{O}$  (40.0 mg, 0.2 mmol), PivOH (20.4 mg, 0.2 mmol), **2a** (99.1 mg, 0.5 mmol), and  $\text{CD}_3\text{OD}$  (2.2 mL). The tube was then sealed, and the mixture was stirred at 70 °C (oil bath) under air for 1 h. It was then cooled to room temperature, filtered through a pad of celite and concentrated under reduced pressure. The residue was purified by silica gel column chromatography using petroleum ether/ethyl acetate (100:1) as eluent to afford **3aa-d<sub>n</sub>**. No deuterium incorporation onto the unreacted *ortho*-position of the phenyl ring of product **3aa** was observed upon analyzing the  $^1\text{H}$  NMR spectrum of the product.

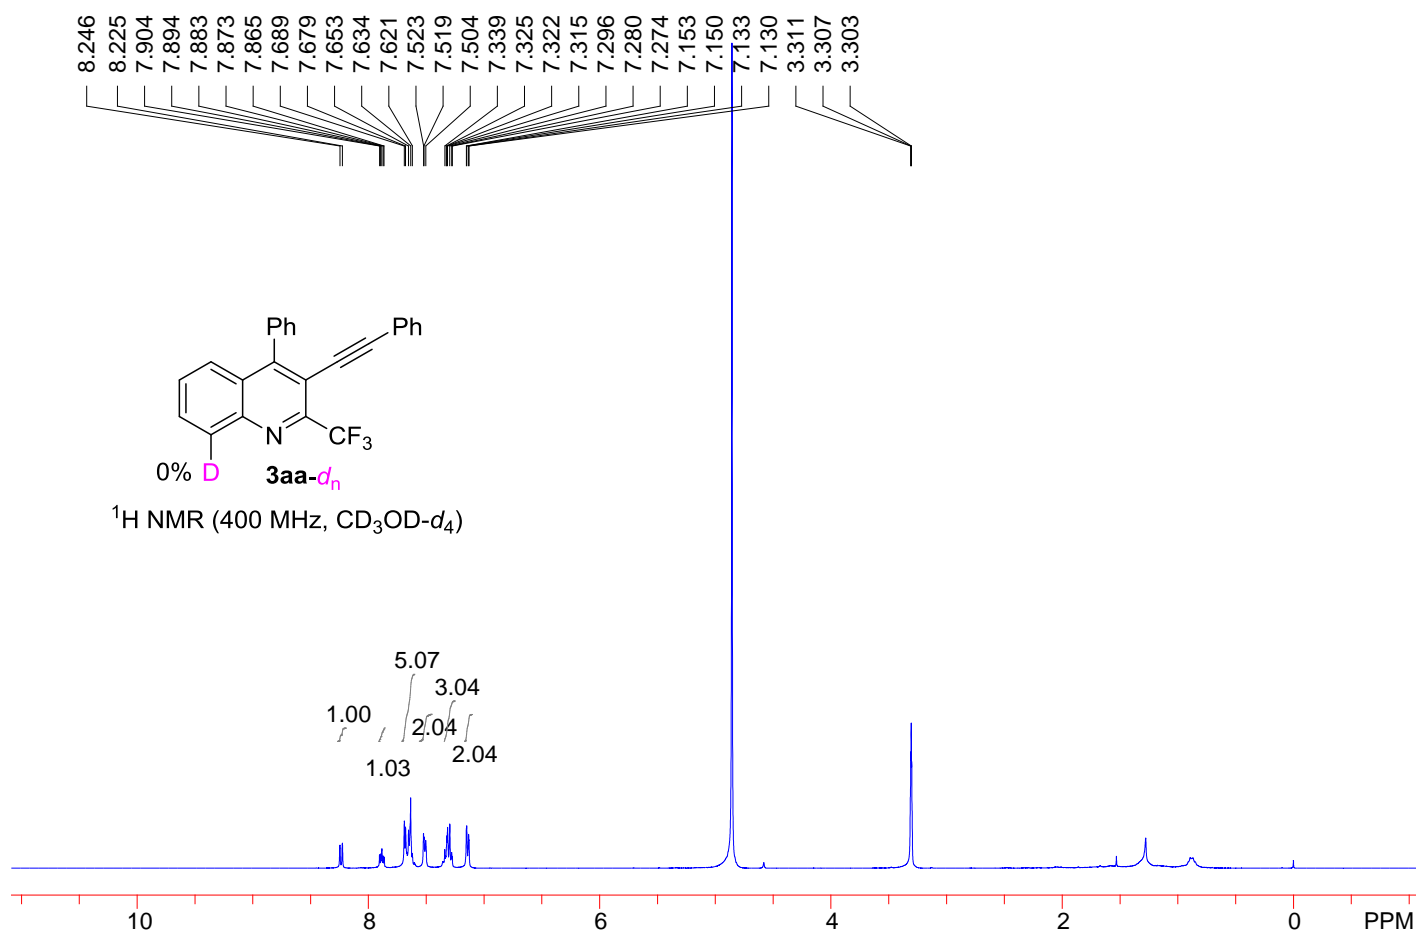



## 2. Kinetic isotope effect study

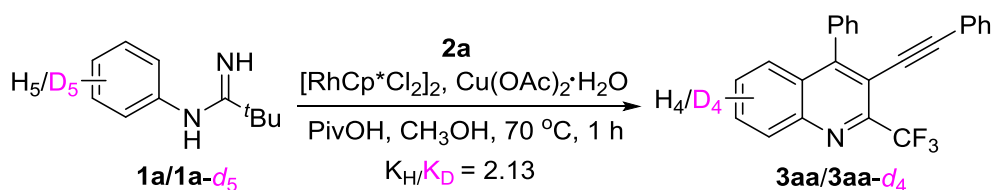

To a reaction tube equipped with a stir bar were added **1a** (35.3 mg, 0.2 mmol), **1a-d<sub>5</sub>** (36.3 mg, 0.2 mmol),  $[\text{RhCp}^*\text{Cl}_2]_2$  (3.7 mg, 0.006 mmol),  $\text{Cu}(\text{OAc})_2 \cdot \text{H}_2\text{O}$  (40.0 mg, 0.2 mmol),  $\text{PivOH}$  (20.4 mg, 0.2 mmol), **2a** (79.3 mg, 0.4 mmol) and  $\text{MeOH}$  (2 mL). The mixture was stirred at  $70\text{ }^\circ\text{C}$  (oil bath) under air for 1 h. It was then cooled to room temperature, filtered through a pad of celite and concentrated under reduced pressure. The residue was purified by silica gel chromatography using petroleum ether/ethyl acetate (100:1) as eluent to afford a mixture of **3aa** and **3aa-d<sub>4</sub>**. Upon analyzing the  $^1\text{H}$  NMR spectrum of the mixture, the ratio of **3aa** to **3aa-d<sub>4</sub>** was determined to be 0.68:0.32. Accordingly, the intermolecular KIE value ( $k_{\text{H}}/k_{\text{D}}$ ) was calculated to be about 2.13.

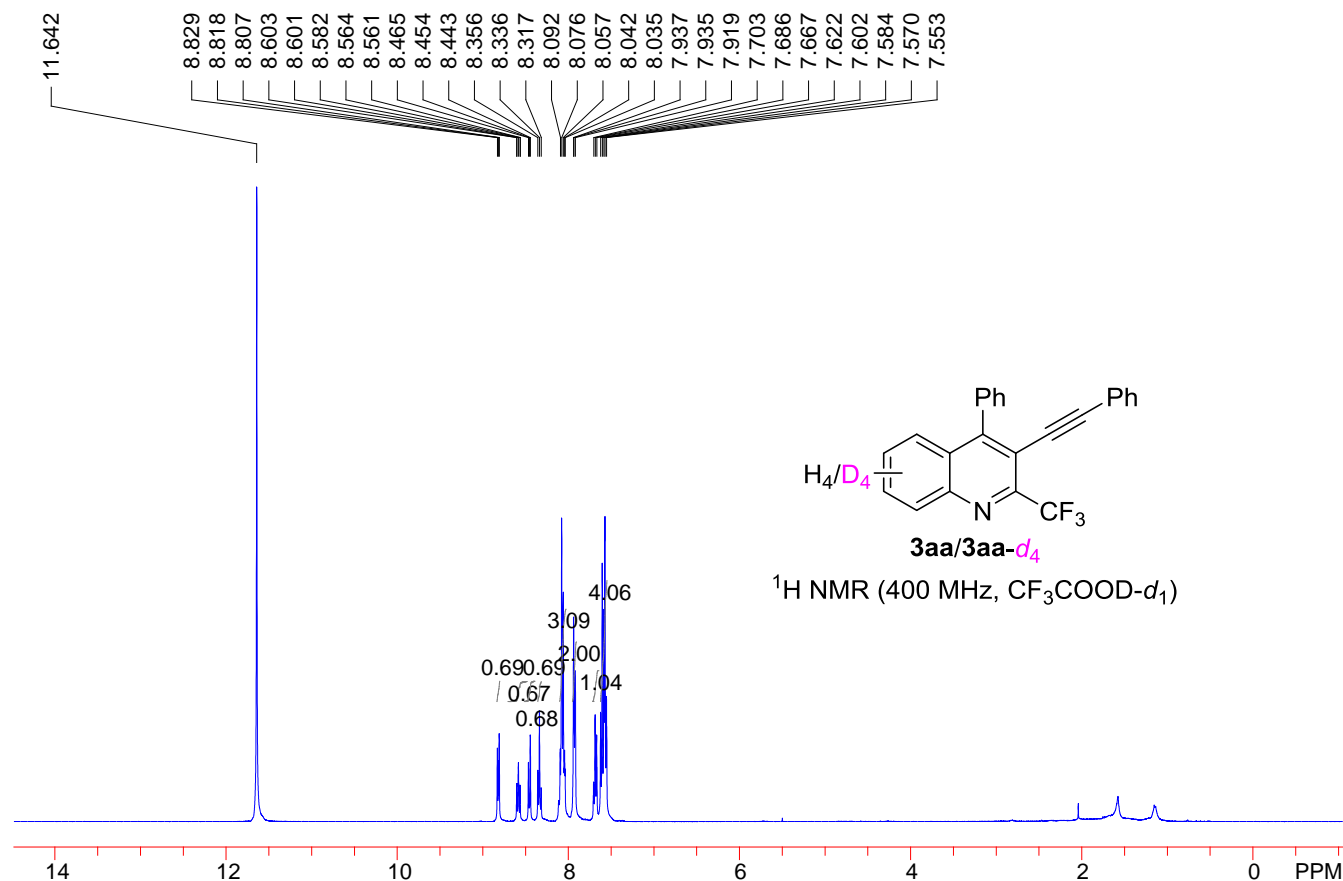

### 3. Electronic competition experiment

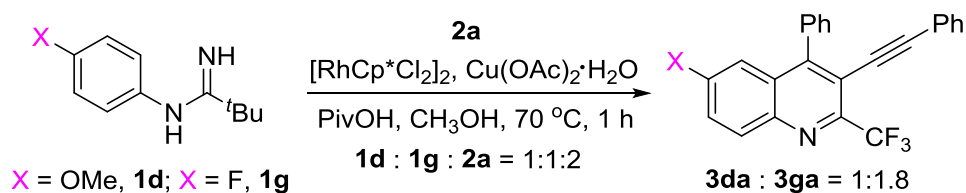

To a reaction tube equipped with a stir bar were added **1d** (41.3 mg, 0.2 mmol), **1g** (38.9 mg, 0.2 mmol),  $[\text{RhCp}^*\text{Cl}_2]_2$  (3.7 mg, 0.006 mmol),  $\text{Cu}(\text{OAc})_2 \cdot \text{H}_2\text{O}$  (40.0 mg, 0.2 mmol), PivOH (20.4 mg, 0.2 mmol), **2a** (79.3 mg, 0.4 mmol) and MeOH (2 mL). The tube was then sealed, and the mixture was stirred at 70 °C (oil bath) under air for 1 h. It was then cooled to room temperature, filtered through a pad of celite and concentrated under reduced pressure. The residue was purified by silica gel column chromatography using petroleum ether/ethyl acetate (100:1) as eluent to afford **3da** (8.1 mg, 10%) and **3ga** (14.1 mg, 18%).

#### IV. NMR spectra of 3aa-3ra, 3ba-3sa

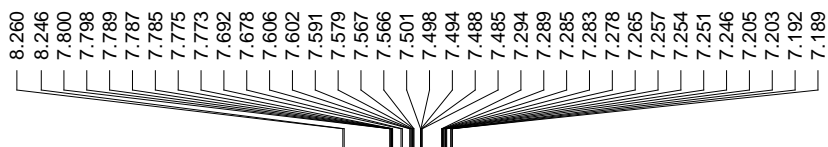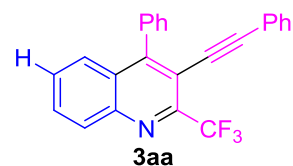

$^1\text{H}$  NMR (600 MHz,  $\text{CDCl}_3$ )

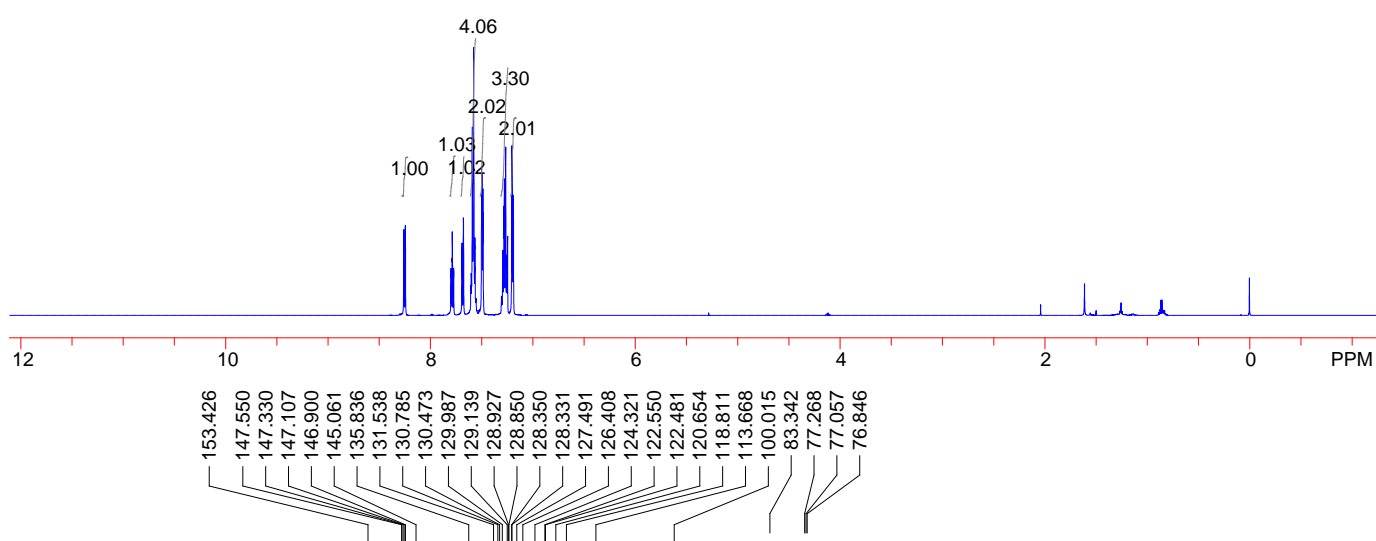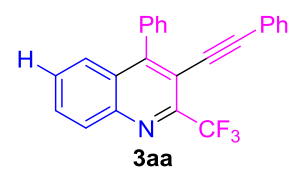

$^{13}\text{C}\{^1\text{H}\}$  (150 MHz,  $\text{CDCl}_3$ )

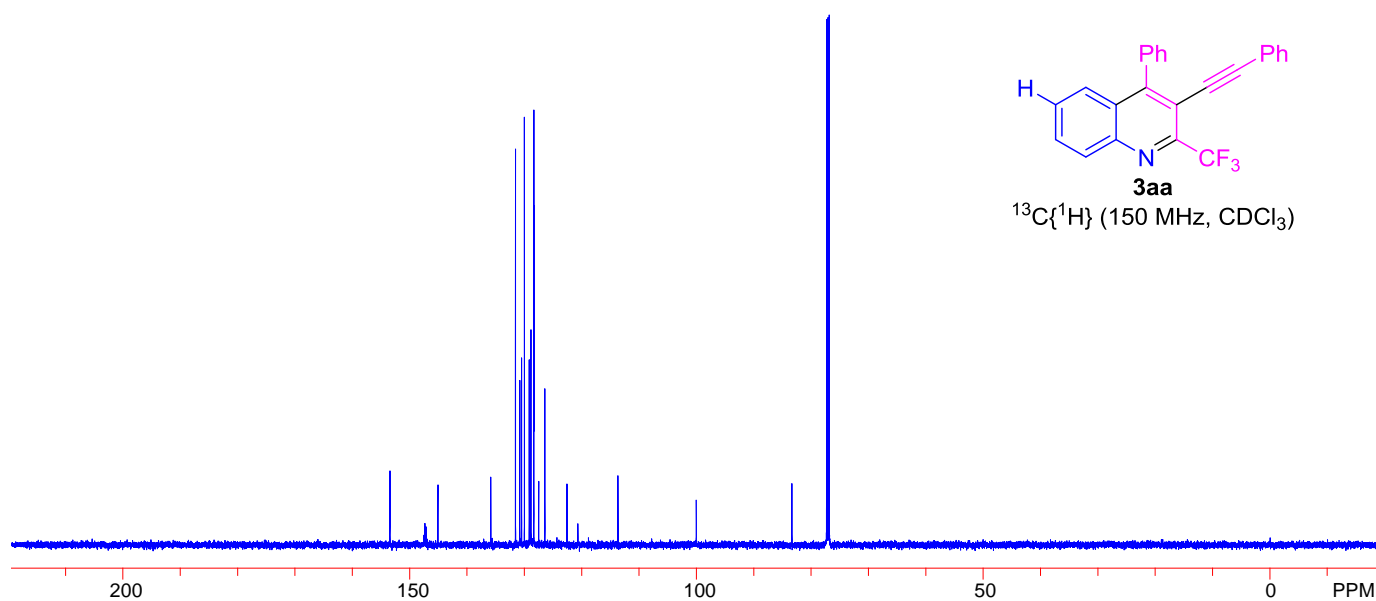

66.143

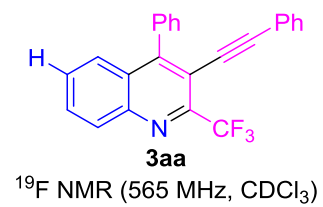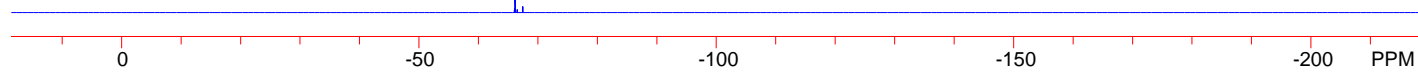

8.149  
8.134  
7.629  
7.626  
7.613  
7.599  
7.587  
7.573  
7.491  
7.488  
7.478  
7.476  
7.413  
7.293  
7.287  
7.281  
7.277  
7.264  
7.253  
7.250  
7.193  
7.191  
7.180  
7.178

2.462

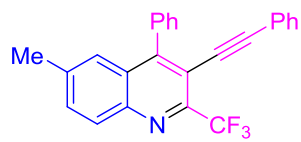

**3ba**  
 $^1\text{H NMR}$  (600 MHz,  $\text{CDCl}_3$ )

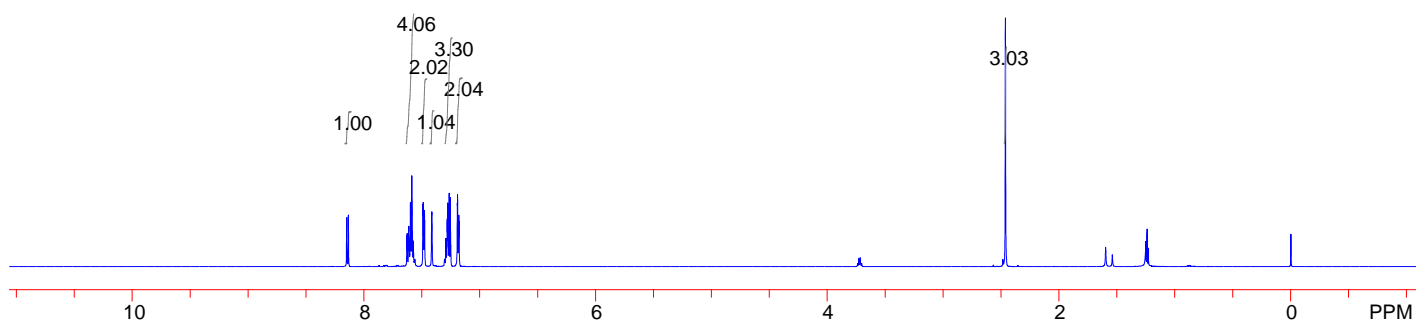

152.670  
146.449  
146.226  
143.667  
139.579  
136.031  
133.140  
131.516  
130.136  
129.973  
128.863  
128.731  
128.346  
128.314  
127.460  
125.086  
122.600  
122.567  
120.730  
113.644  
99.835  
83.473  
77.270  
77.058  
76.847

22.027

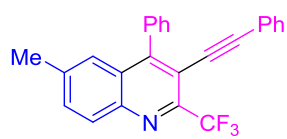

**3ba**  
 $^{13}\text{C}\{^1\text{H}\}$  (150 MHz,  $\text{CDCl}_3$ )

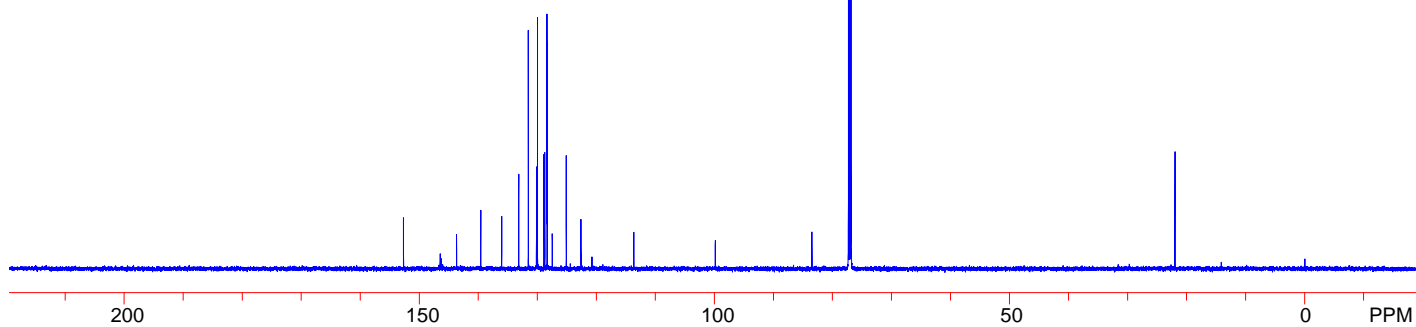

66.011

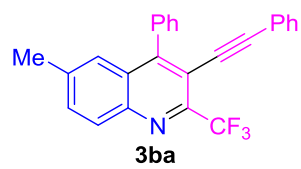

<sup>19</sup>F NMR (565 MHz, CDCl<sub>3</sub>)

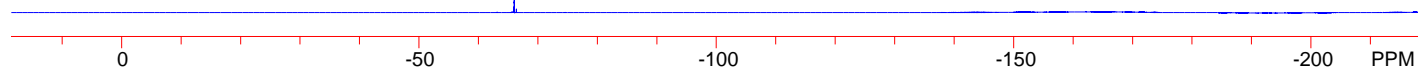

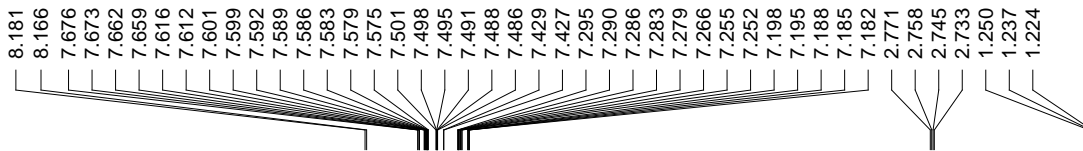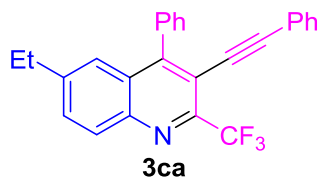

<sup>1</sup>H NMR (600 MHz, CDCl<sub>3</sub>)

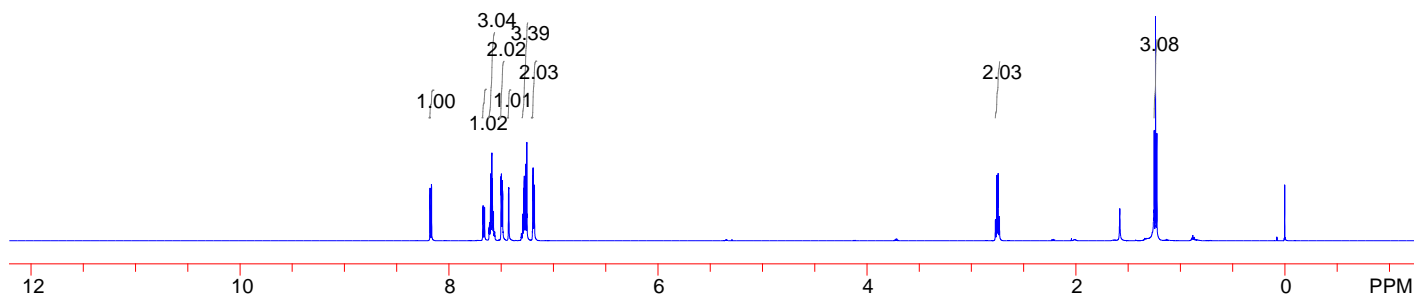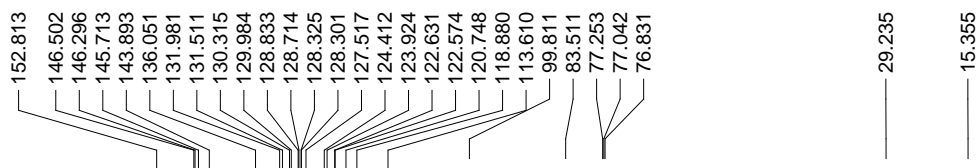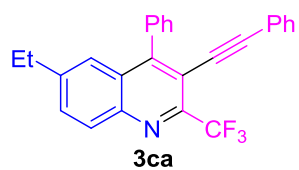

<sup>13</sup>C{<sup>1</sup>H} (150 MHz, CDCl<sub>3</sub>)

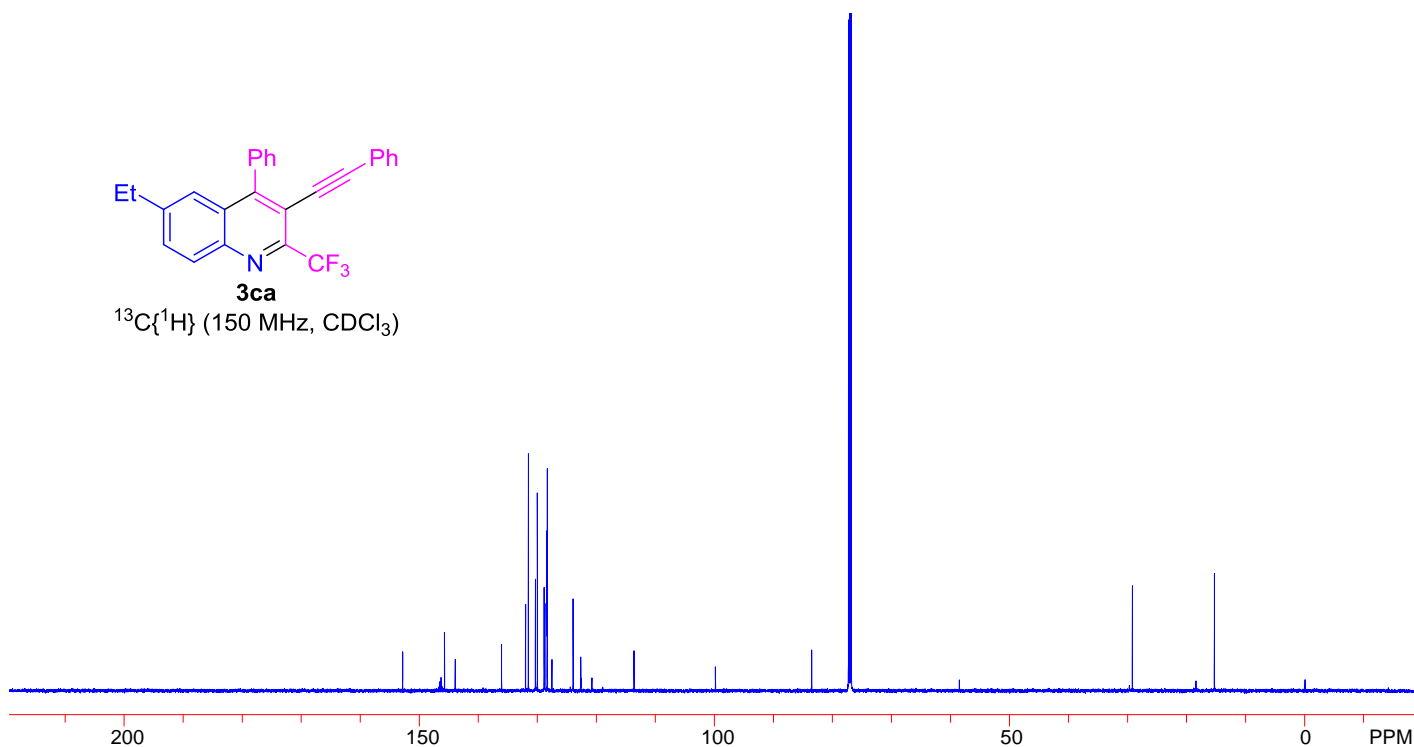

65.998

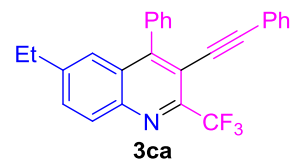

**3ca**  
<sup>19</sup>F NMR (565 MHz, CDCl<sub>3</sub>)

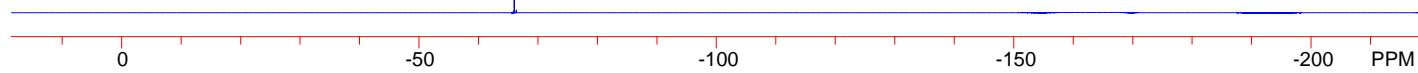



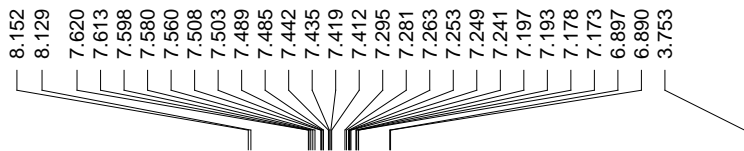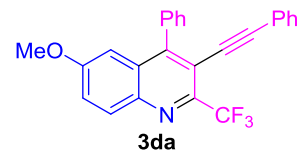

<sup>1</sup>H NMR (400 MHz, CDCl<sub>3</sub>)

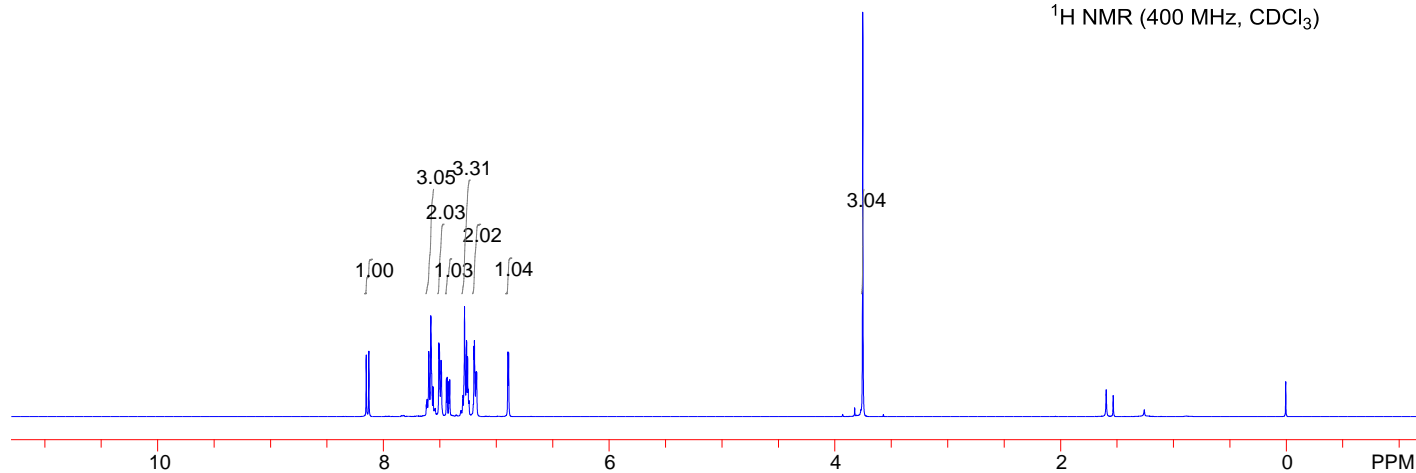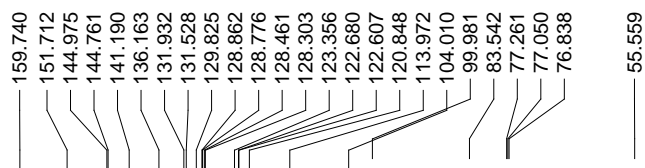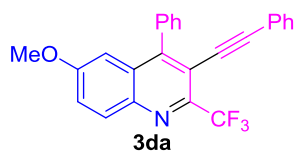

<sup>13</sup>C{<sup>1</sup>H} (150 MHz, CDCl<sub>3</sub>)

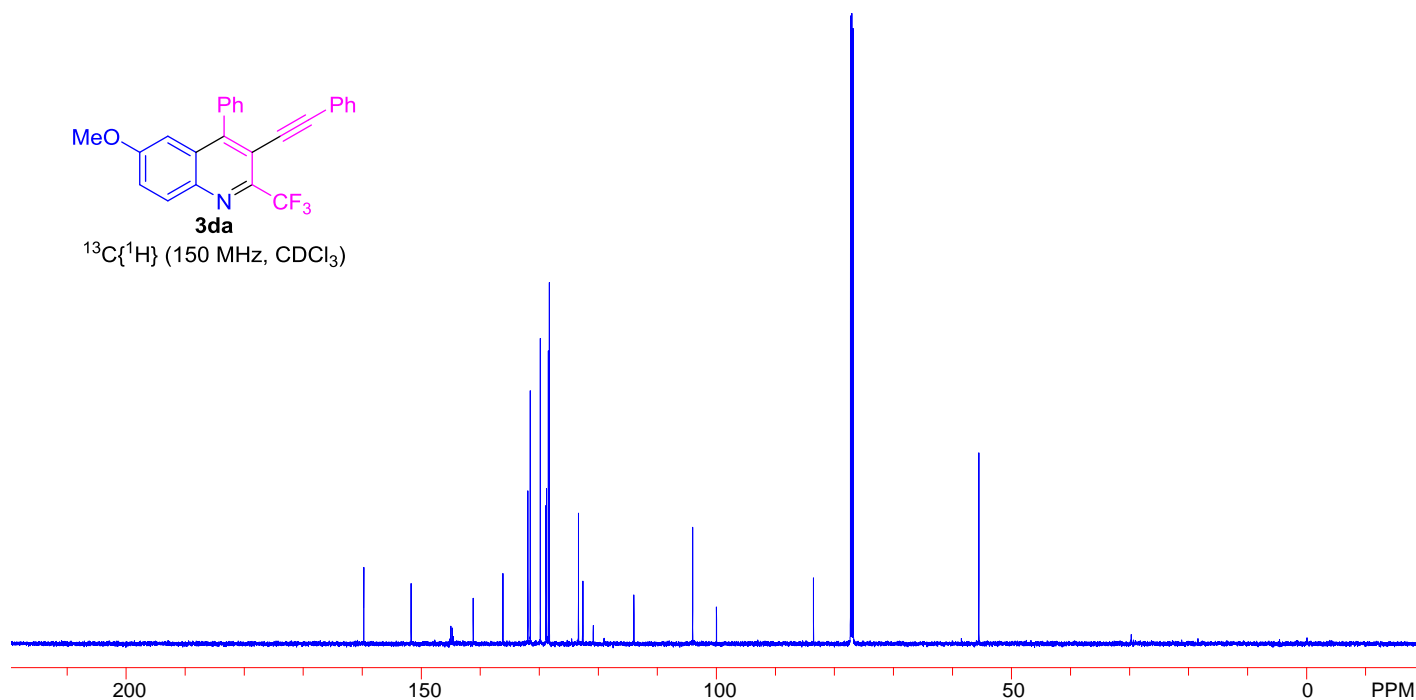

65.815

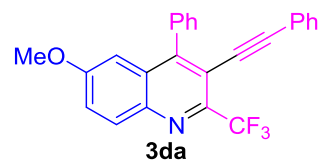

<sup>19</sup>F NMR (565 MHz, CDCl<sub>3</sub>)

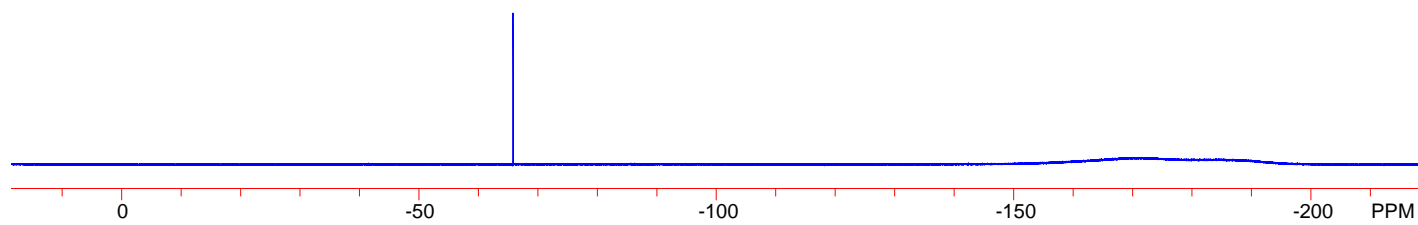

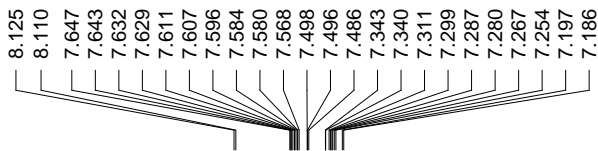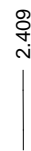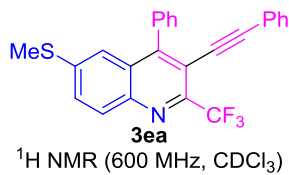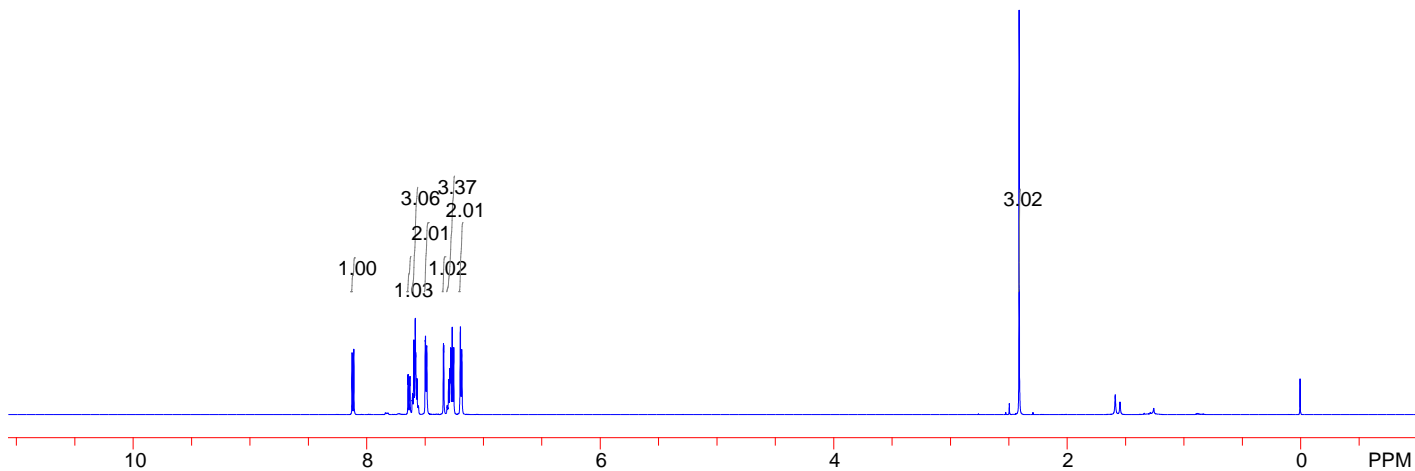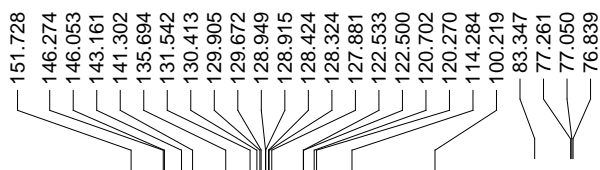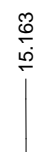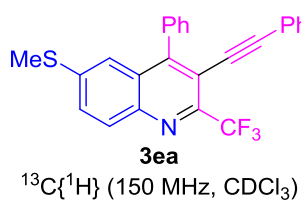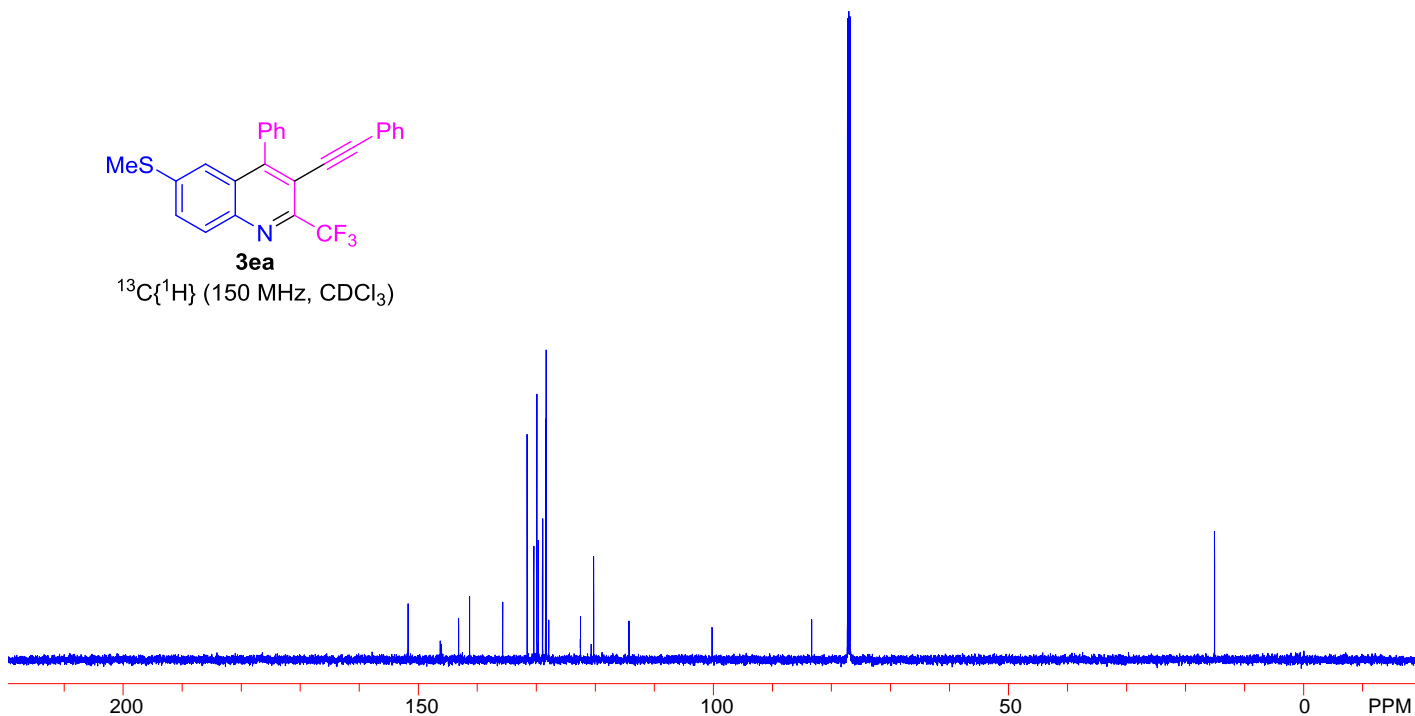

65.980

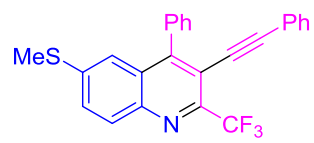

**3a**  
<sup>19</sup>F NMR (565 MHz, CDCl<sub>3</sub>)

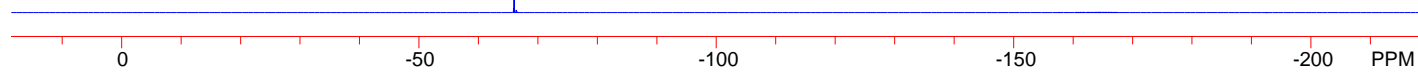

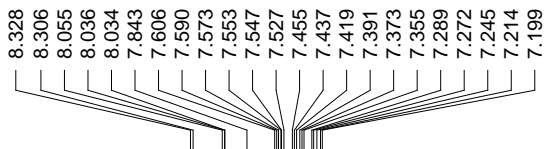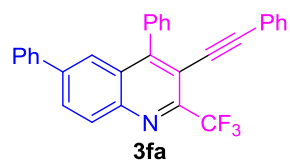

$^1\text{H NMR}$  (400 MHz,  $\text{CDCl}_3$ )

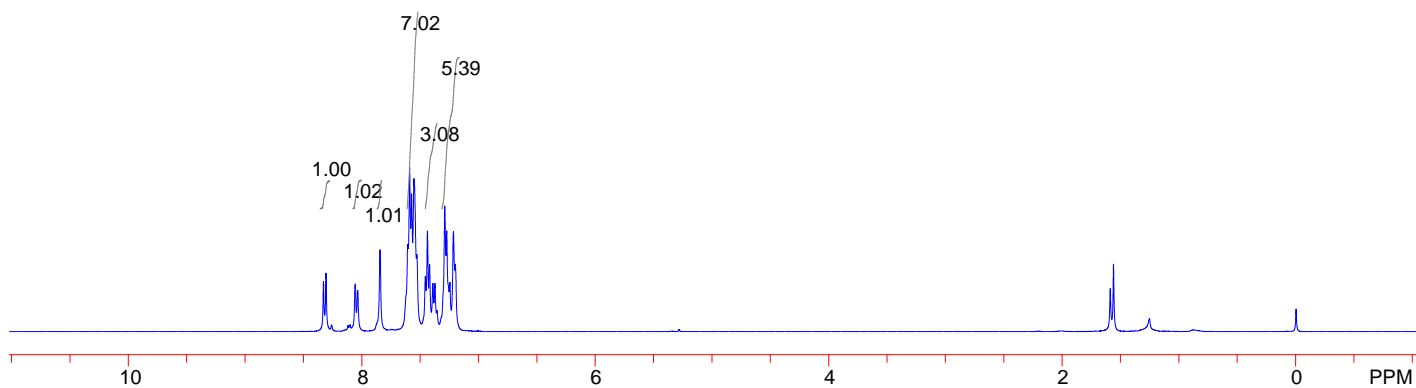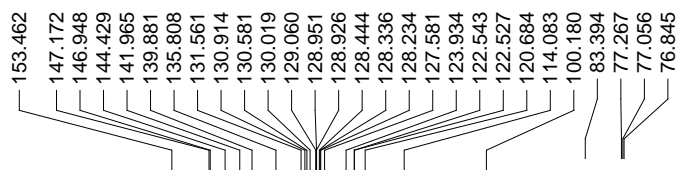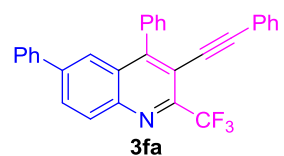

$^{13}\text{C}\{^1\text{H}\}$  (150 MHz,  $\text{CDCl}_3$ )

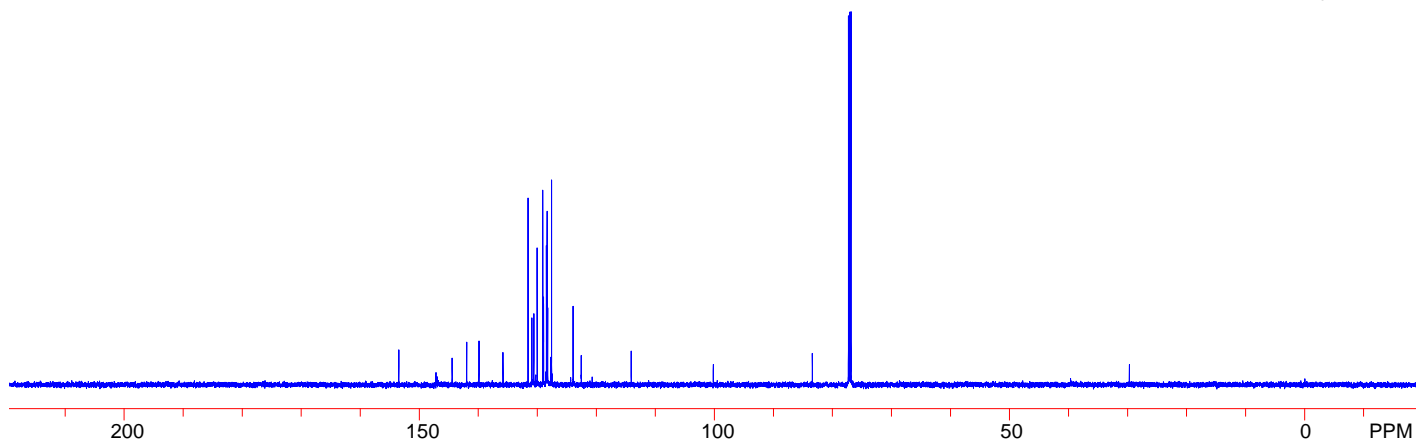

66.061

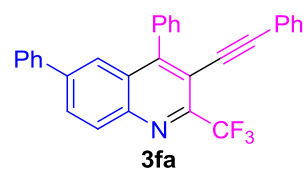

<sup>19</sup>F NMR (565 MHz, CDCl<sub>3</sub>)

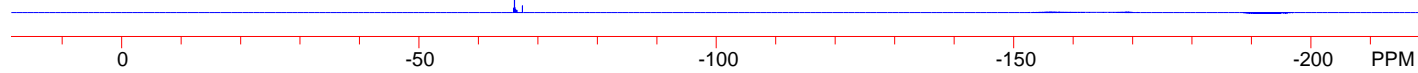

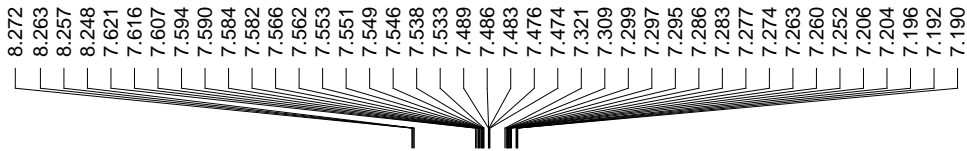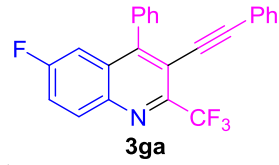

$^1\text{H NMR}$  (600 MHz,  $\text{CDCl}_3$ )

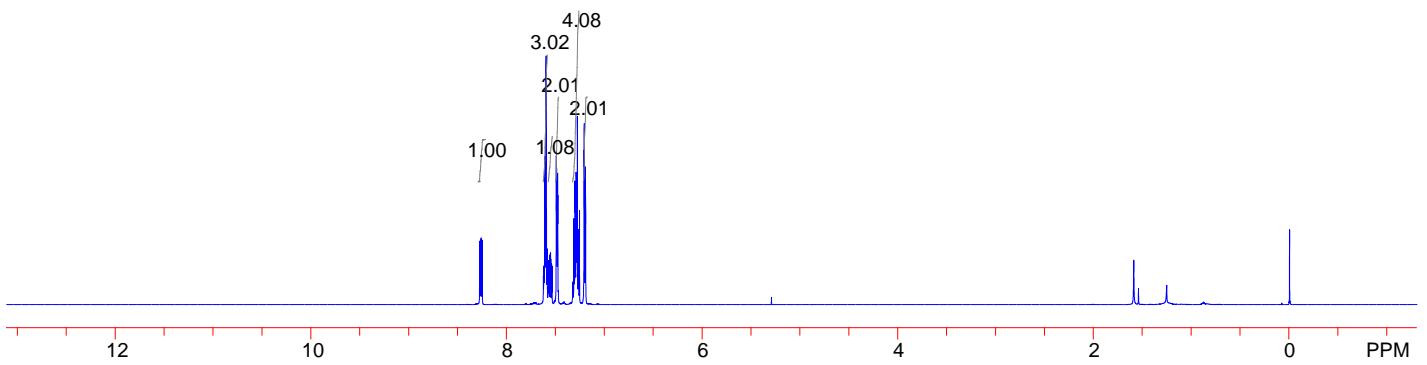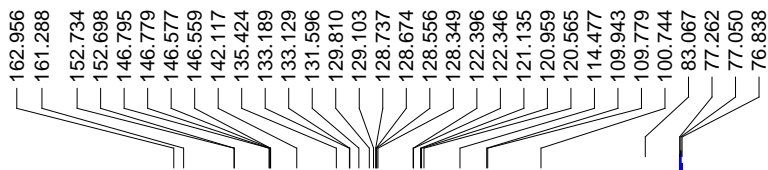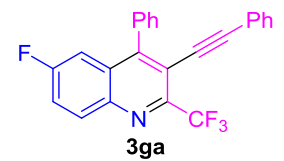

$^{13}\text{C}\{^1\text{H}\}$  (150 MHz,  $\text{CDCl}_3$ )

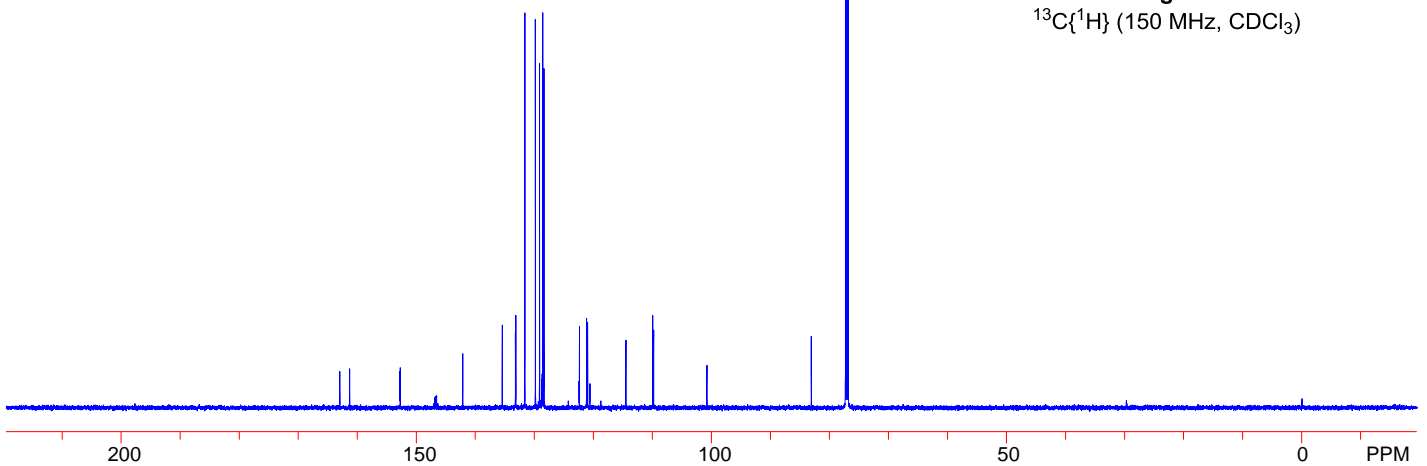

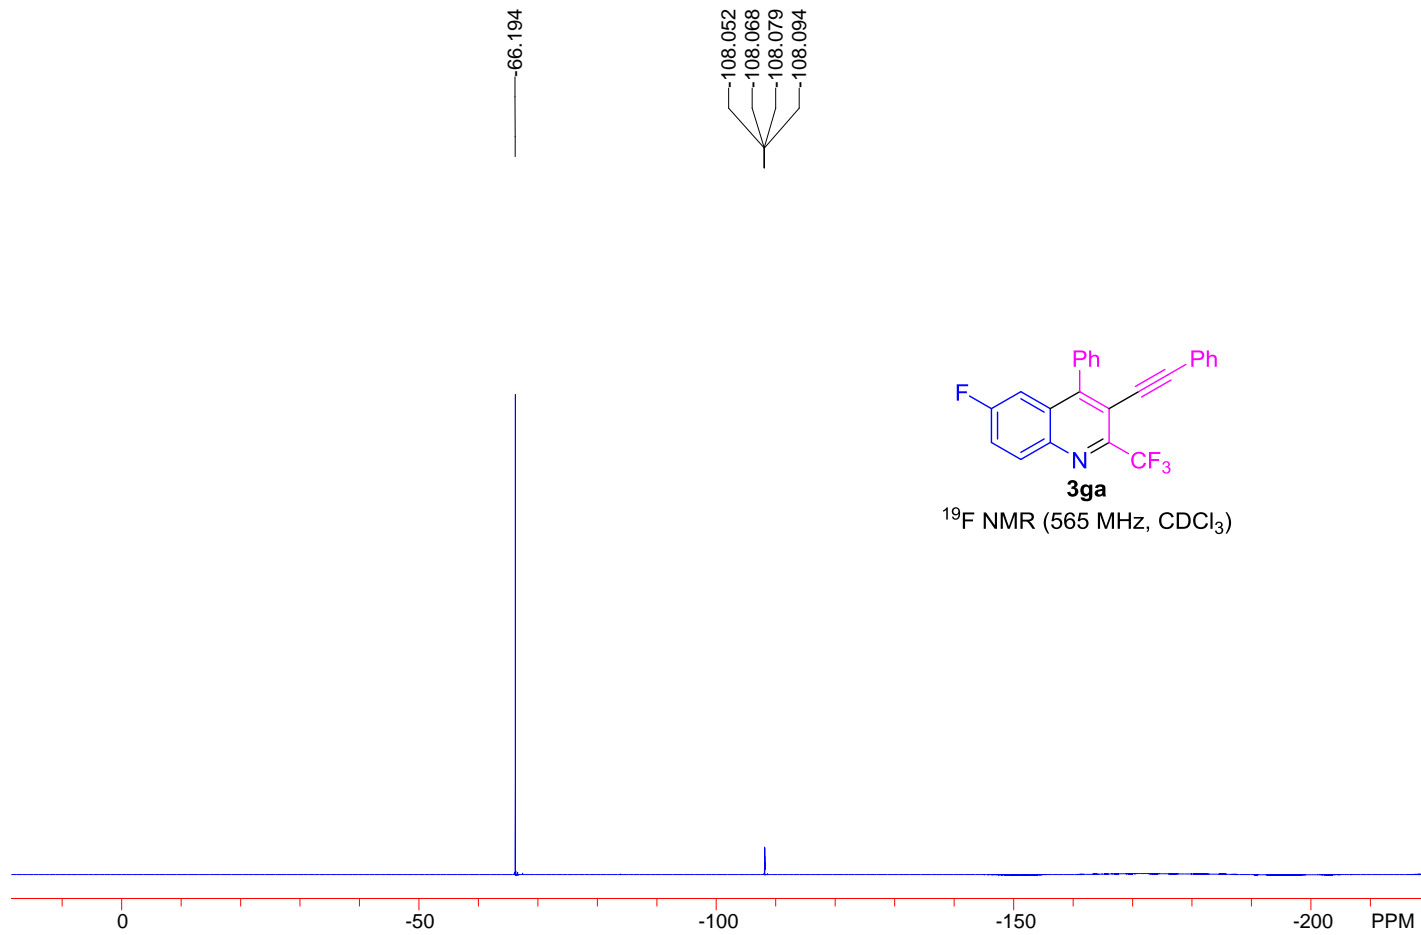



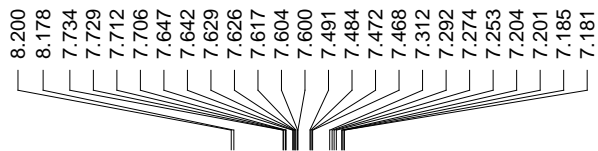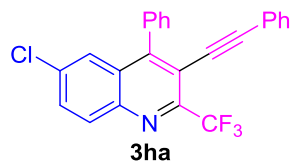

<sup>1</sup>H NMR (400 MHz, CDCl<sub>3</sub>)

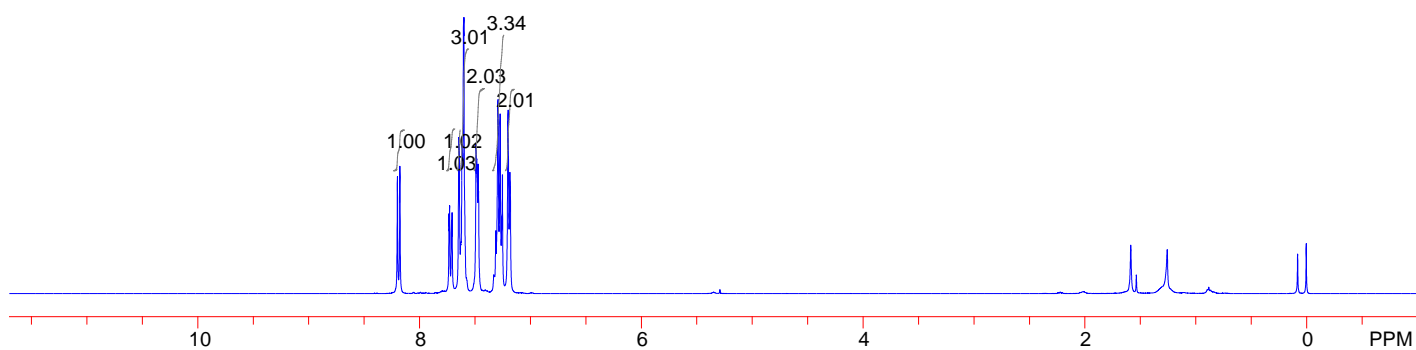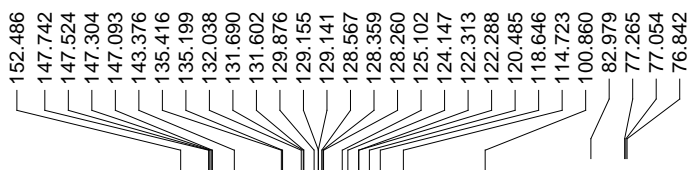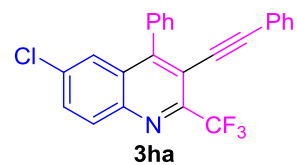

<sup>13</sup>C{<sup>1</sup>H} (150 MHz, CDCl<sub>3</sub>)

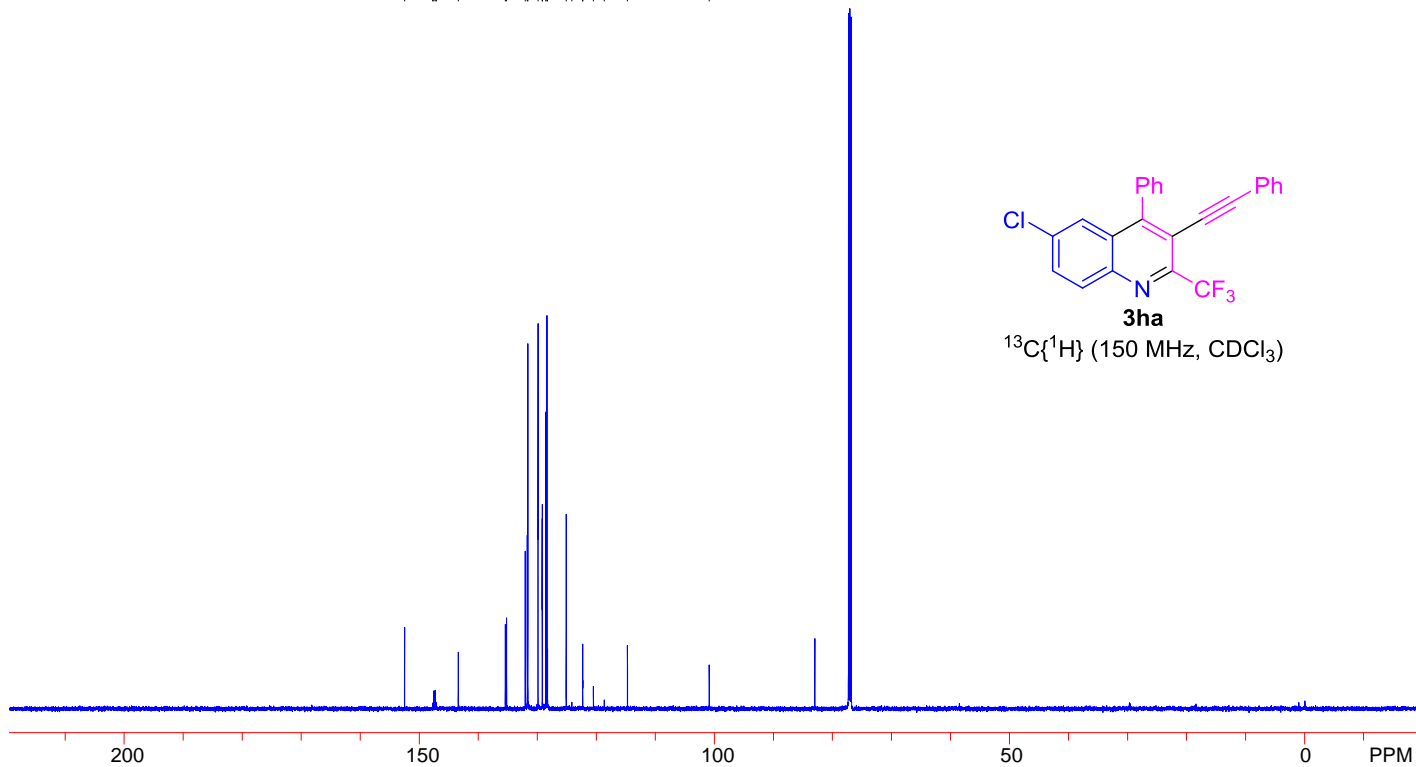

66.284

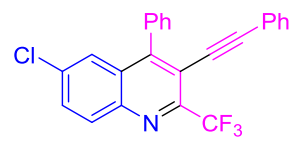

**3ha**  
<sup>19</sup>F NMR (565 MHz, CDCl<sub>3</sub>)

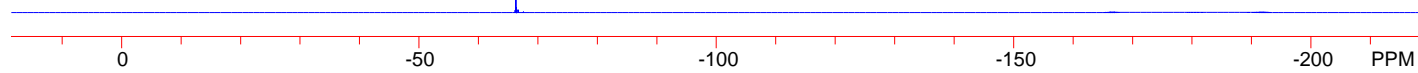

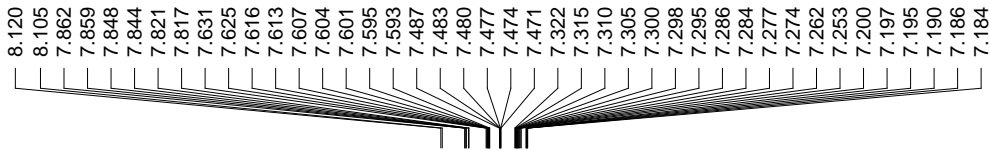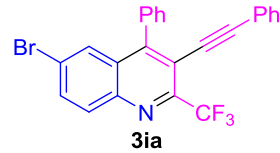

$^1\text{H NMR}$  (600 MHz,  $\text{CDCl}_3$ )

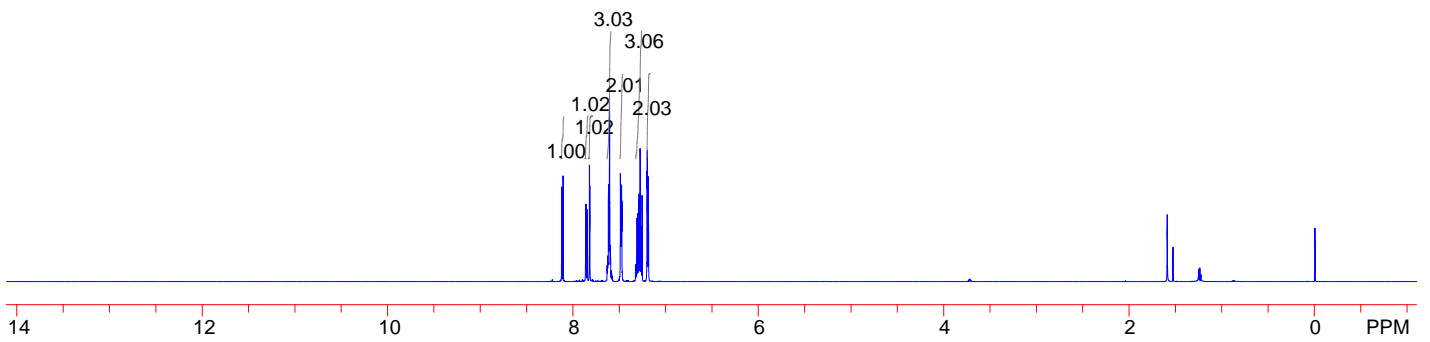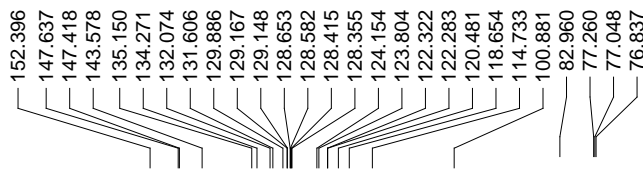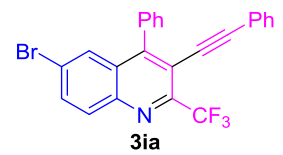

$^{13}\text{C}\{^1\text{H}\}$  (150 MHz,  $\text{CDCl}_3$ )

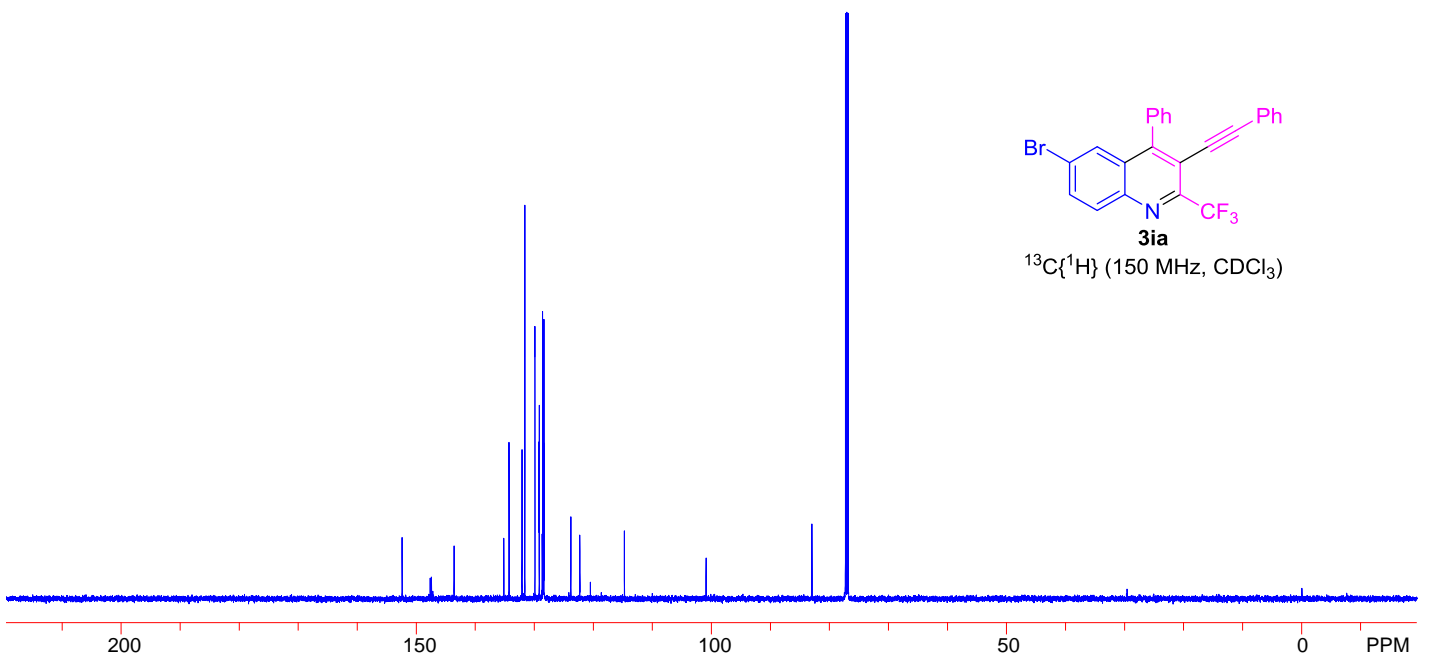

-66.317

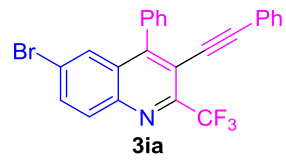

**3ia**  
<sup>19</sup>F NMR (565 MHz, CDCl<sub>3</sub>)

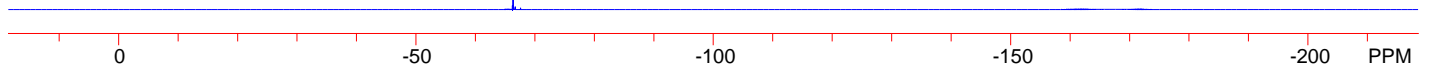

8.031  
7.576  
7.568  
7.487  
7.481  
7.468  
7.404  
7.382  
7.269  
7.265  
7.251  
7.237  
7.231  
7.201  
7.197  
7.184  
7.178

2.566

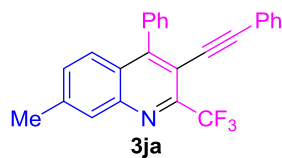

$^1\text{H NMR}$  (400 MHz,  $\text{CDCl}_3$ )

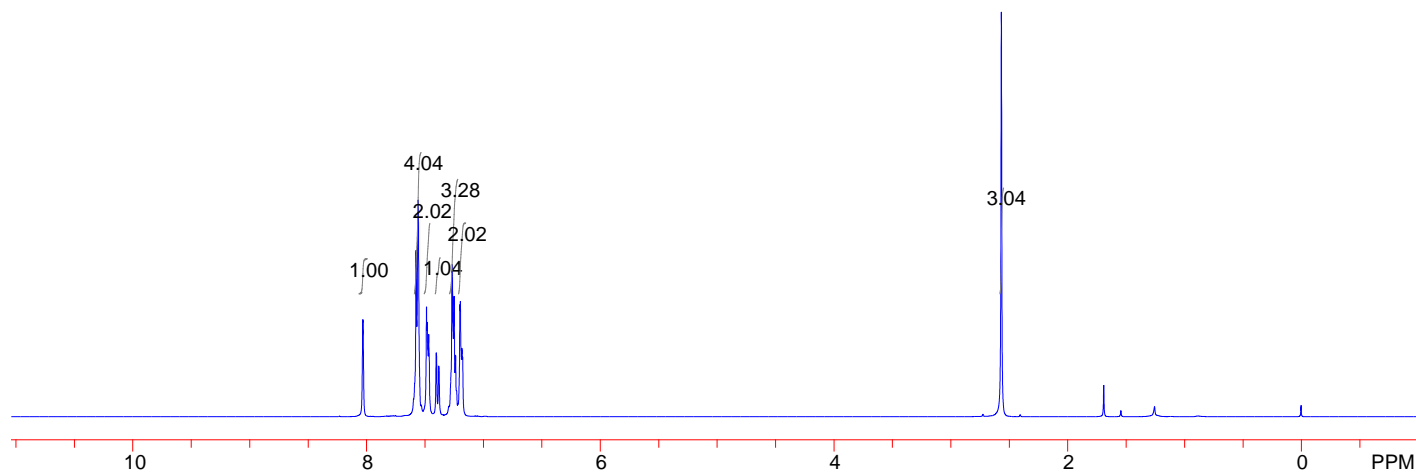

153.167  
147.559  
147.347  
147.122  
146.916  
145.328  
141.604  
135.962  
131.481  
131.424  
129.993  
129.457  
128.810  
128.781  
128.303  
126.073  
125.533  
124.394  
122.676  
122.562  
120.723  
118.894  
112.780  
99.597  
83.485  
77.292  
77.081  
76.870

21.783

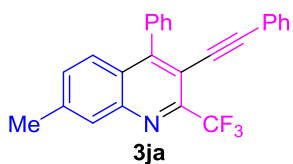

$^{13}\text{C}\{^1\text{H}\}$  (150 MHz,  $\text{CDCl}_3$ )

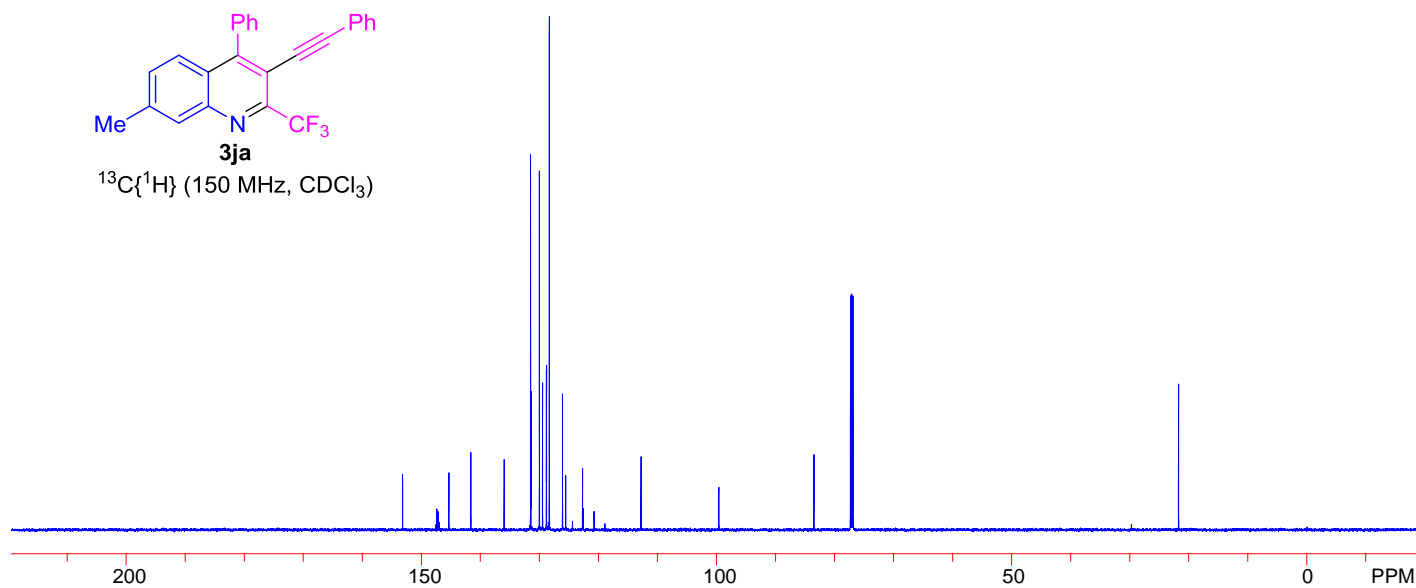

66.063

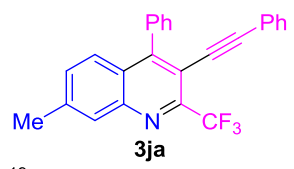

<sup>19</sup>F NMR (376 MHz, CDCl<sub>3</sub>)

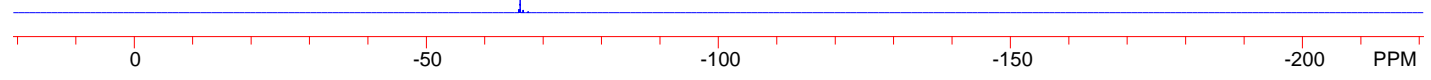

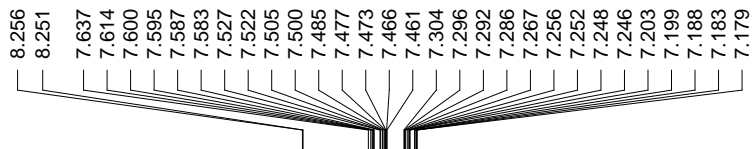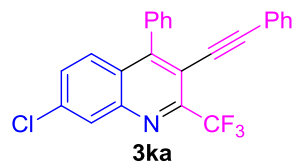

$^1\text{H NMR}$  (400 MHz,  $\text{CDCl}_3$ )

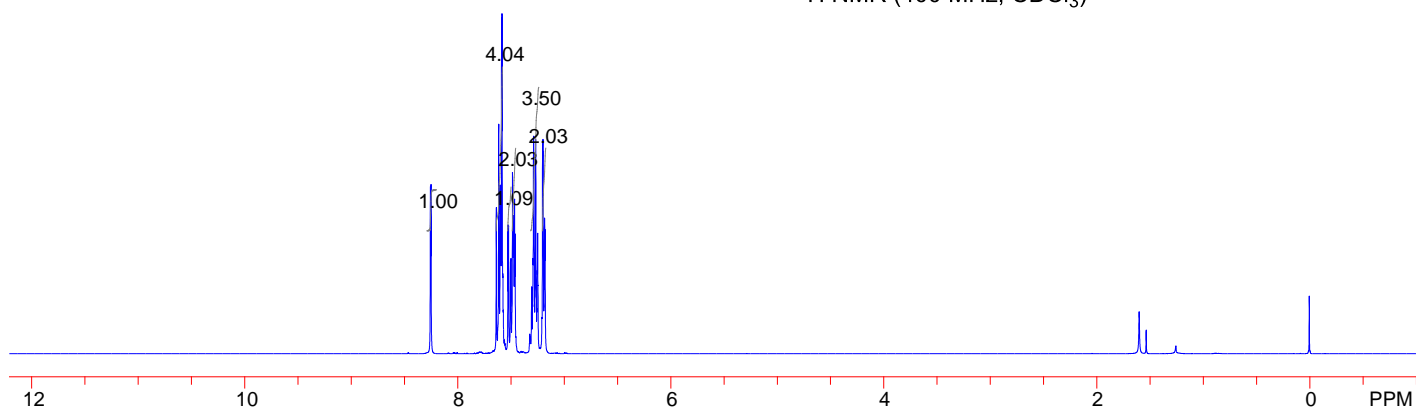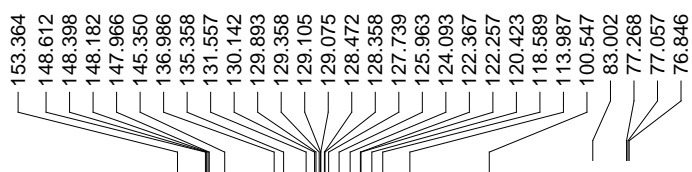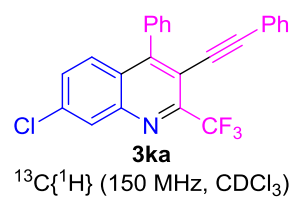

$^{13}\text{C}\{^1\text{H}\}$  (150 MHz,  $\text{CDCl}_3$ )

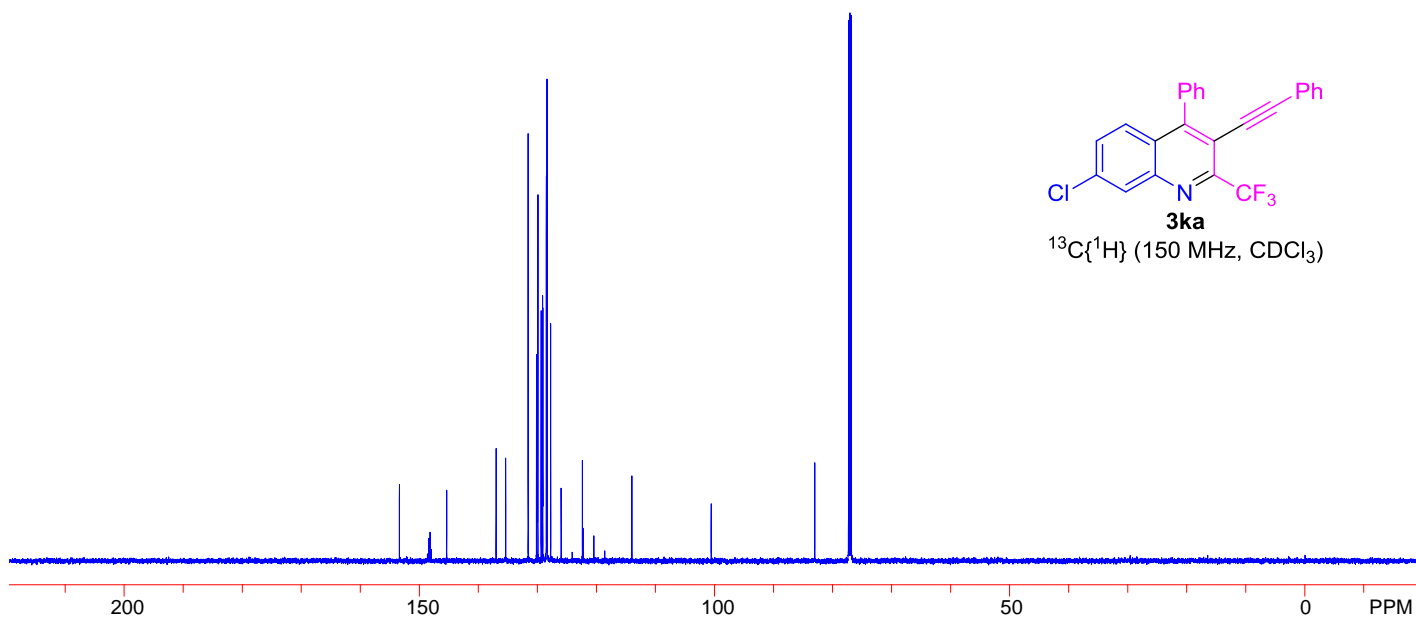

66.384

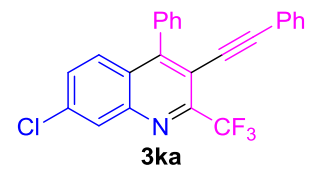

<sup>19</sup>F NMR (376 MHz, CDCl<sub>3</sub>)

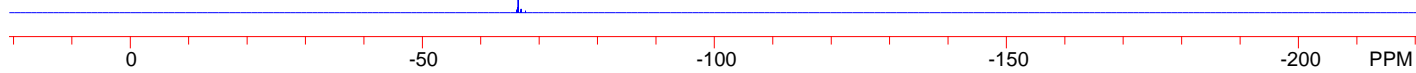



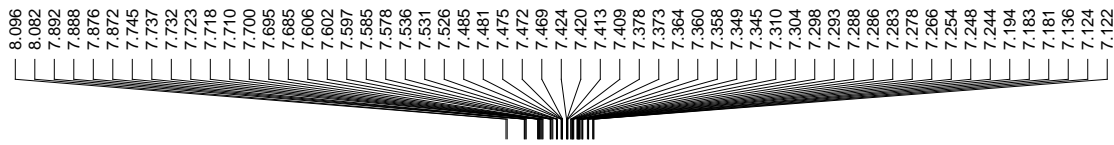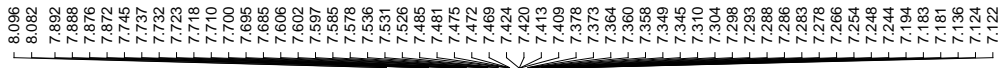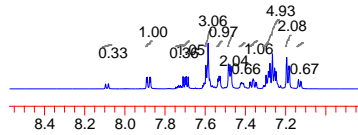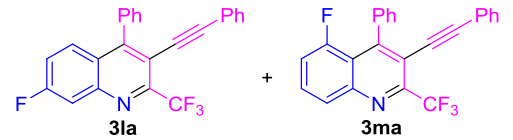

<sup>1</sup>H NMR (600 MHz, CDCl<sub>3</sub>)

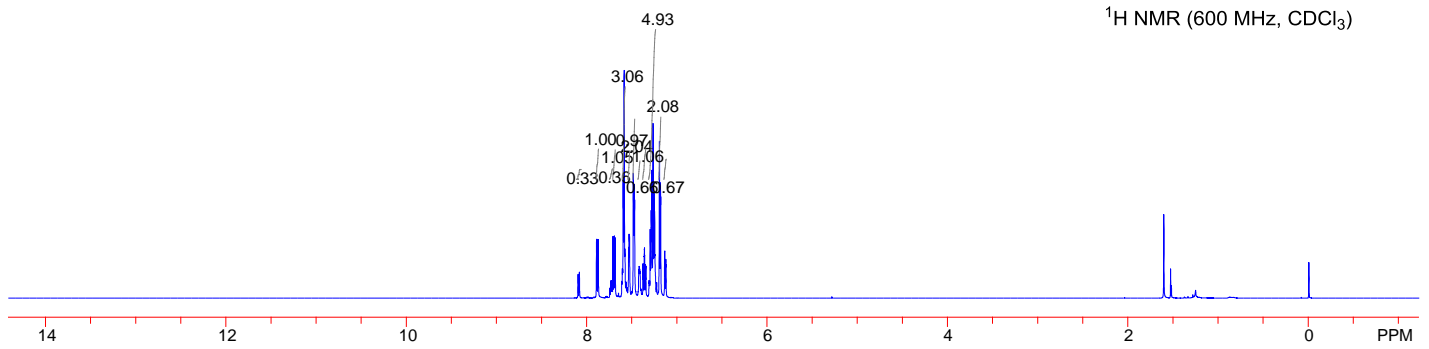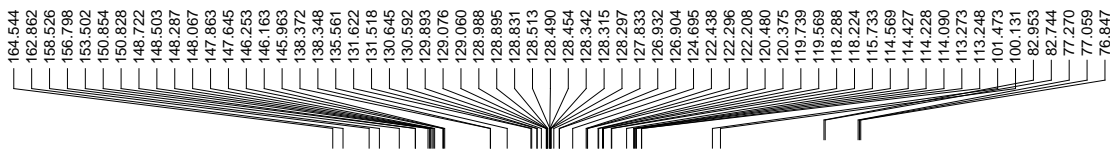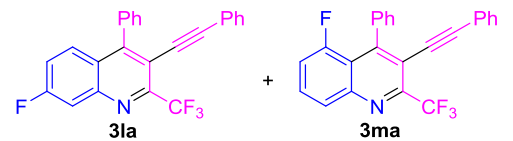

<sup>13</sup>C{<sup>1</sup>H} (150 MHz, CDCl<sub>3</sub>)

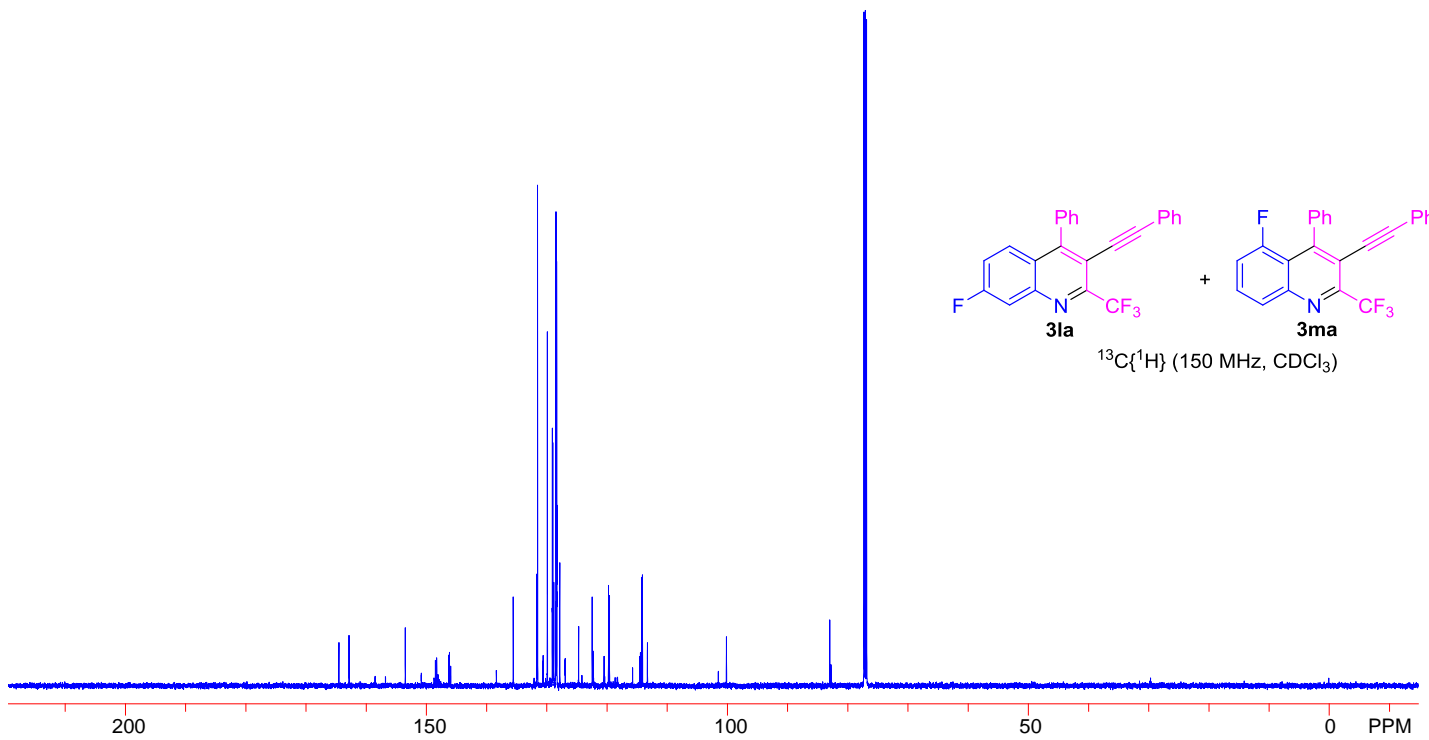

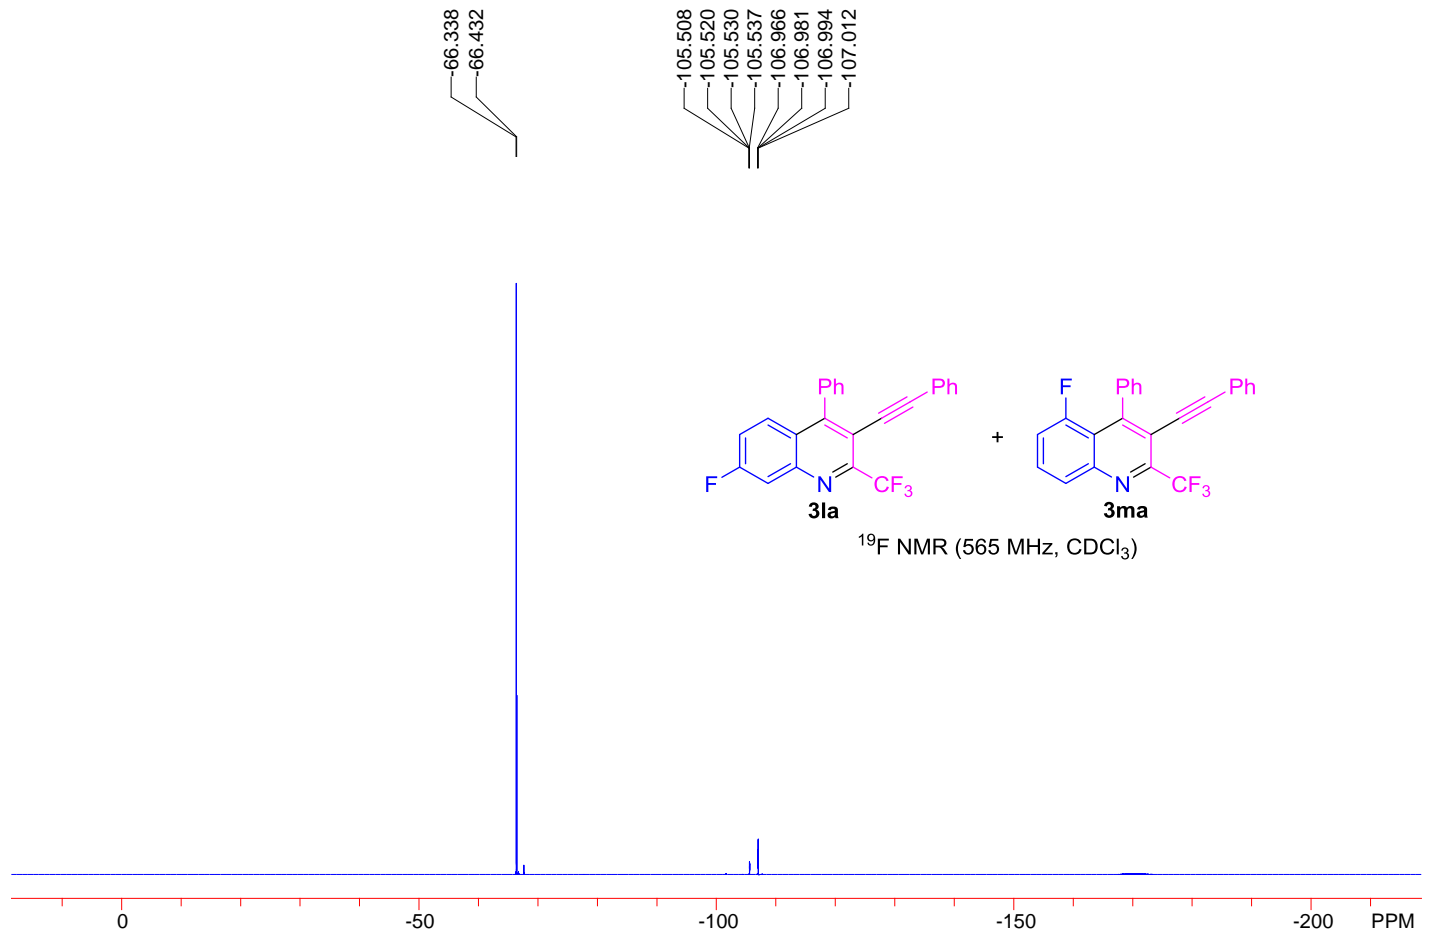

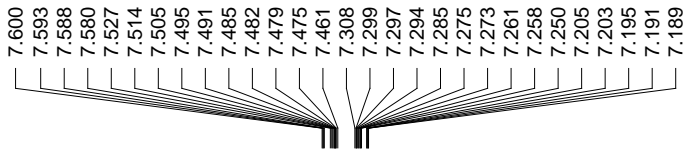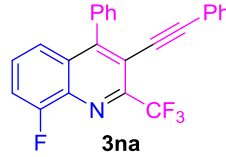

$^1\text{H NMR}$  (600 MHz,  $\text{CDCl}_3$ )

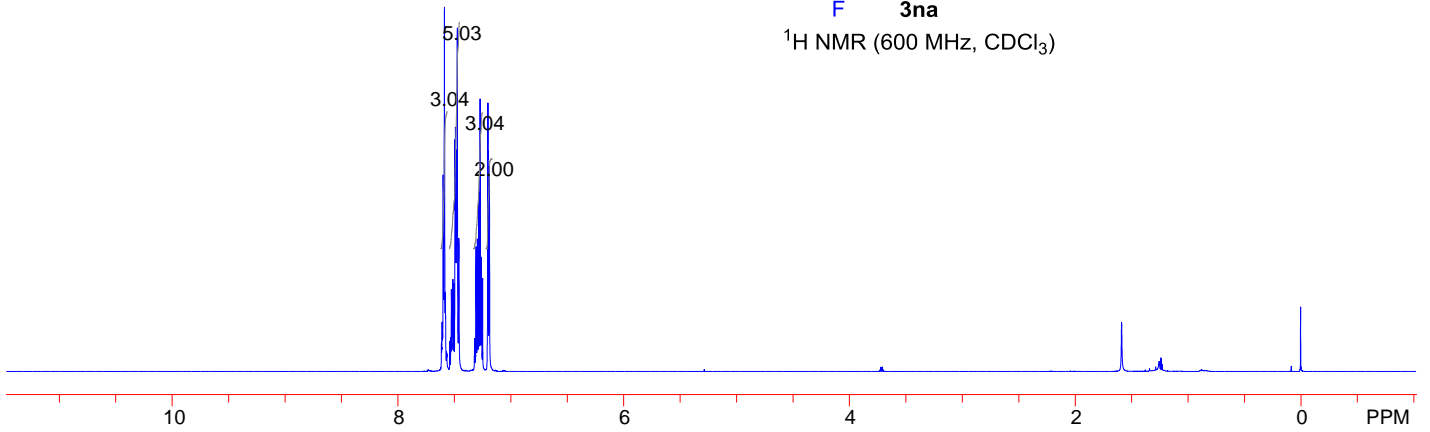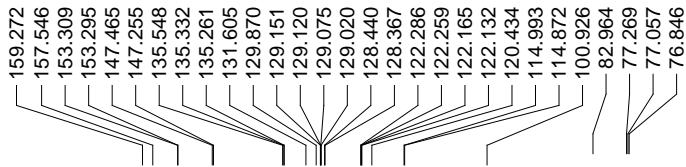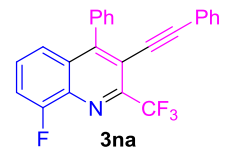

$^{13}\text{C}\{^1\text{H}\}$  (150 MHz,  $\text{CDCl}_3$ )

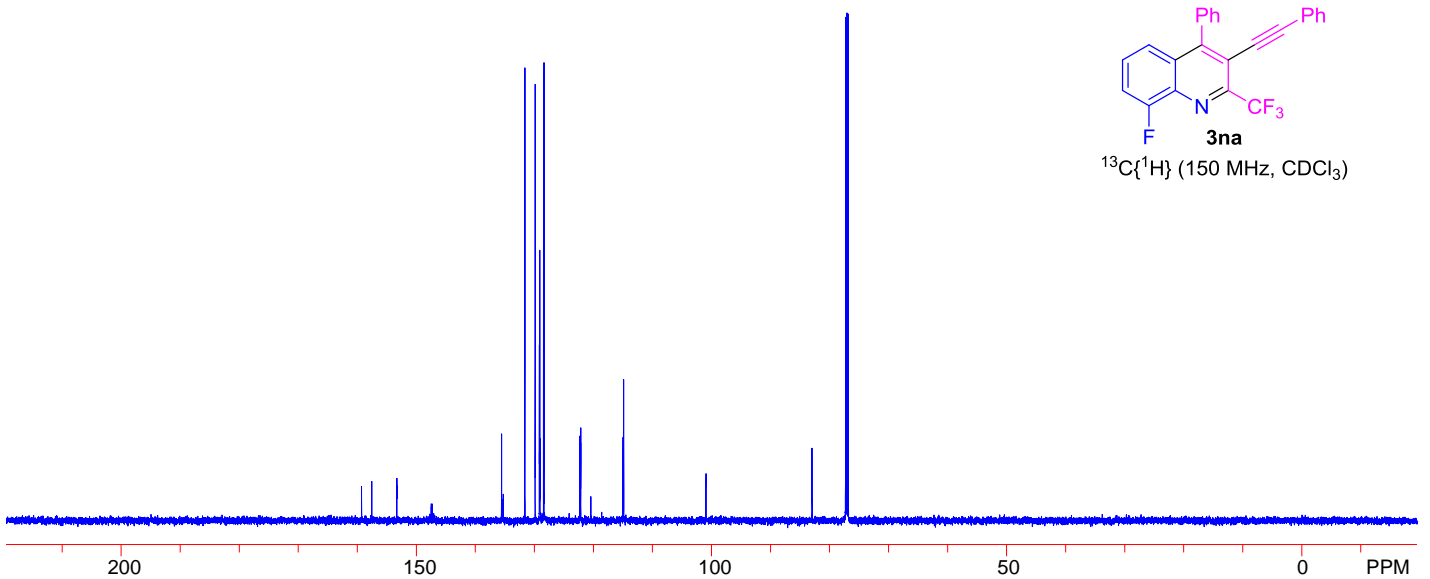

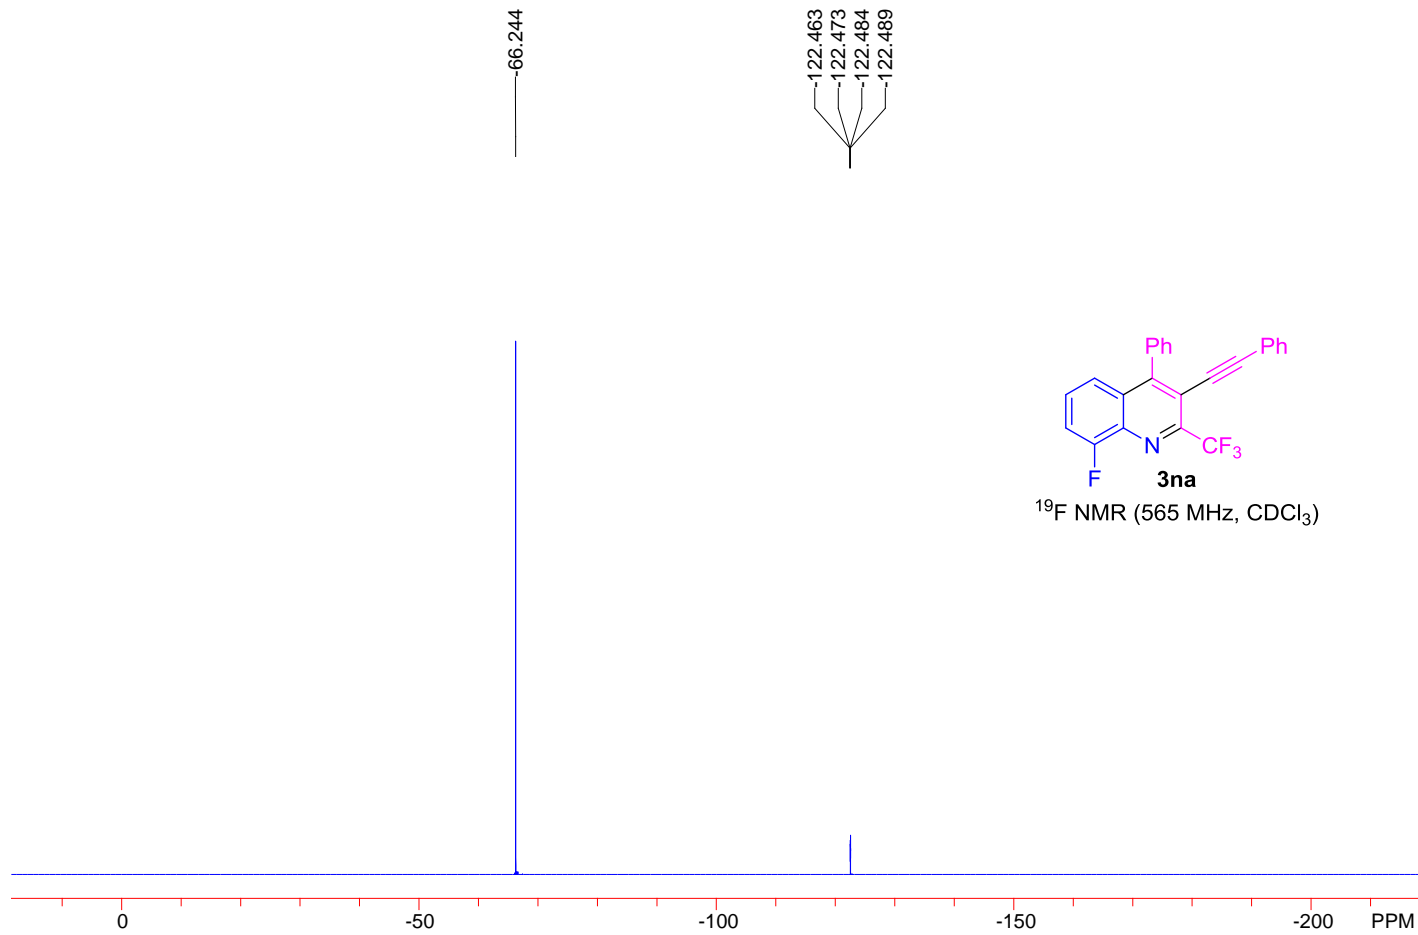

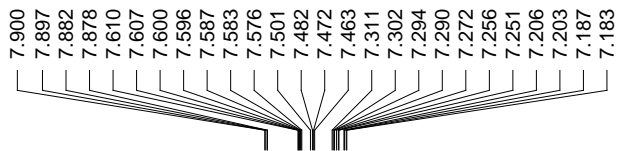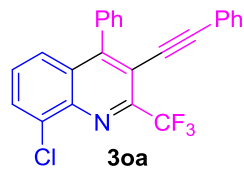

$^1\text{H}$  NMR (400 MHz,  $\text{CDCl}_3$ )

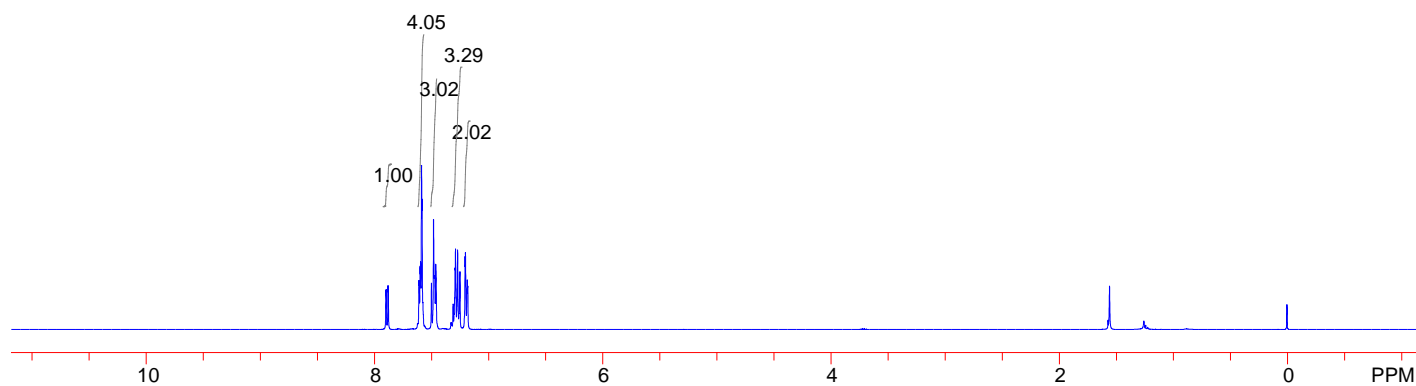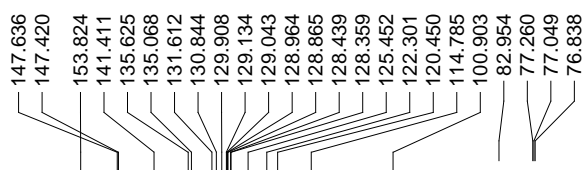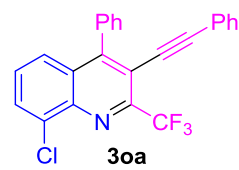

$^{13}\text{C}\{^1\text{H}\}$  (150 MHz,  $\text{CDCl}_3$ )

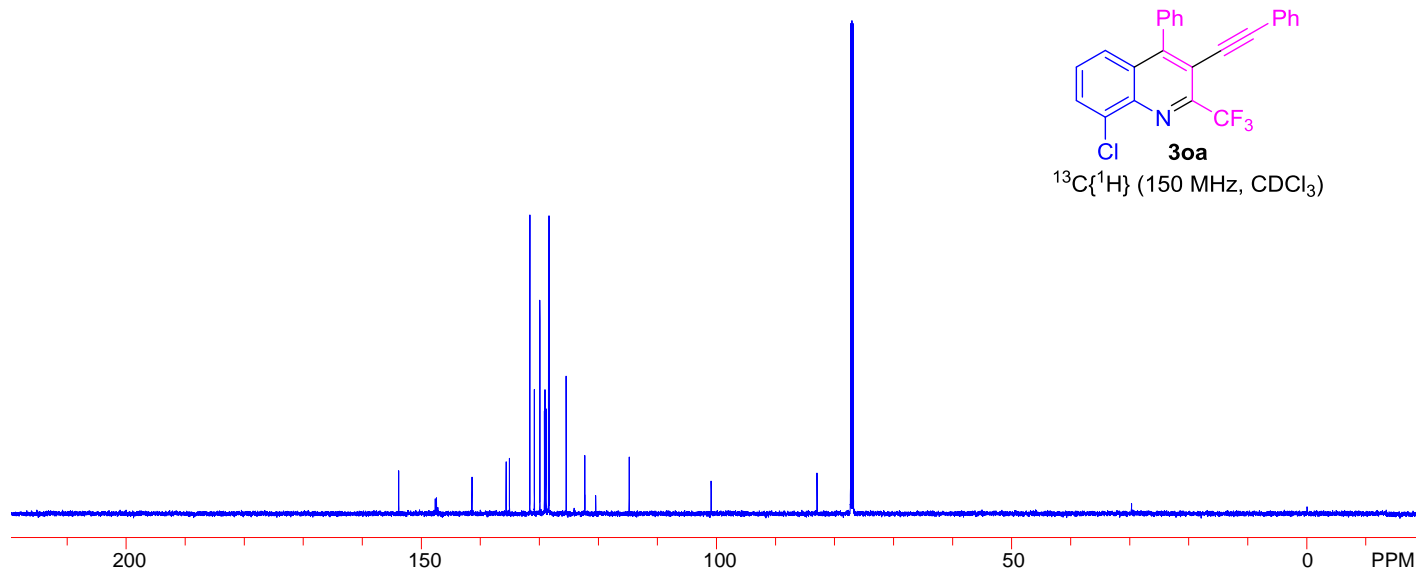

66.256

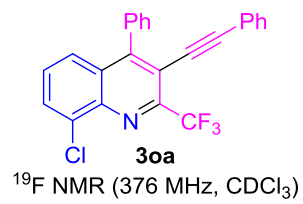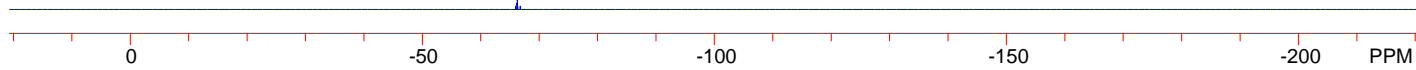

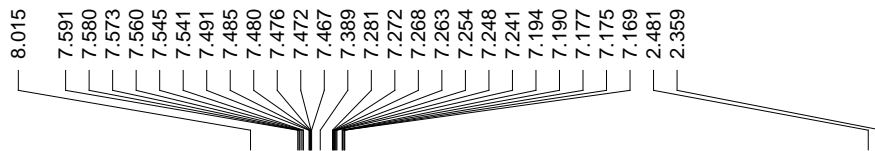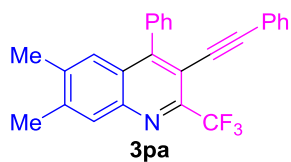

$^1\text{H NMR}$  (400 MHz,  $\text{CDCl}_3$ )

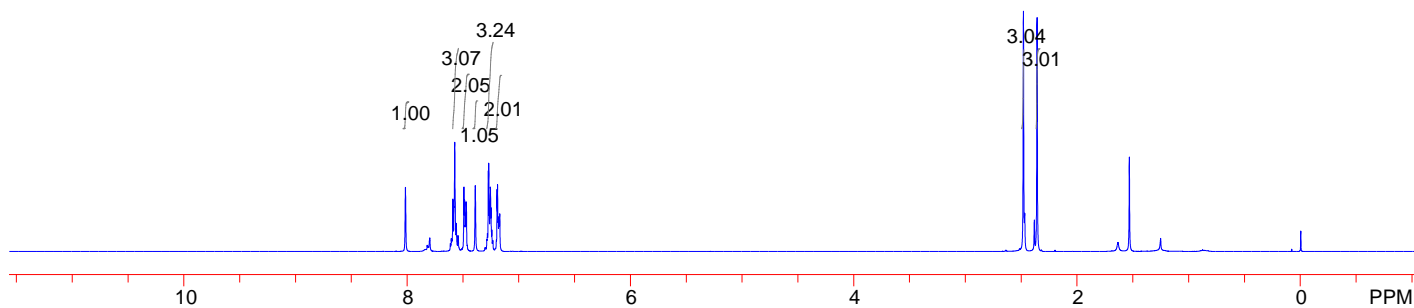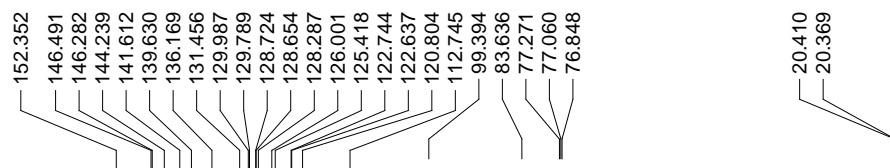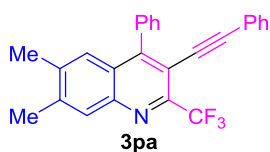

$^{13}\text{C}\{^1\text{H}\}$  (150 MHz,  $\text{CDCl}_3$ )

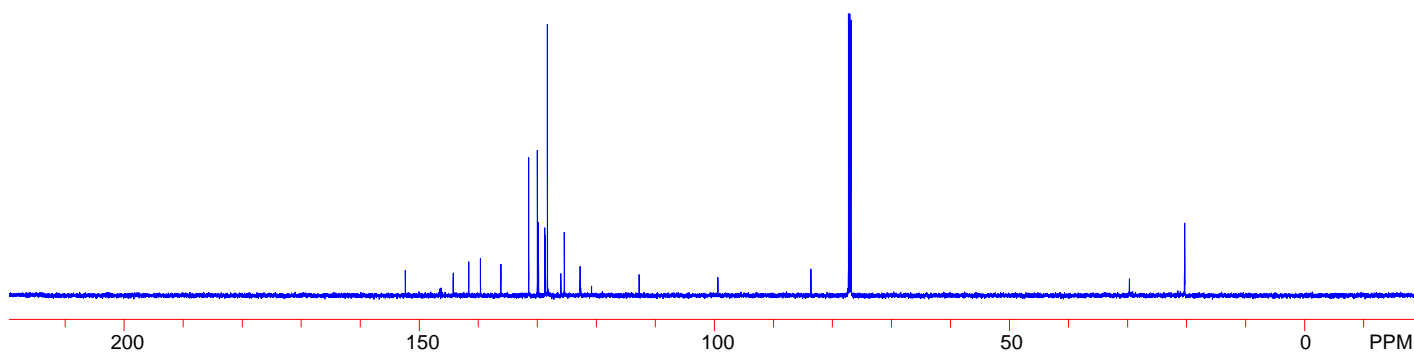

65.915

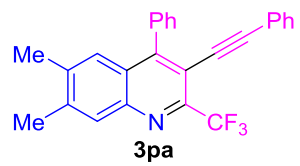

<sup>19</sup>F NMR (565 MHz, CDCl<sub>3</sub>)

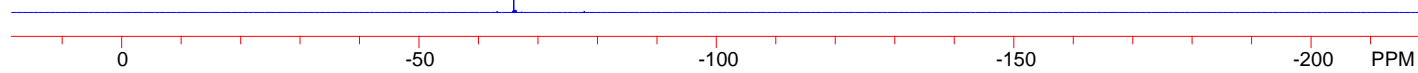



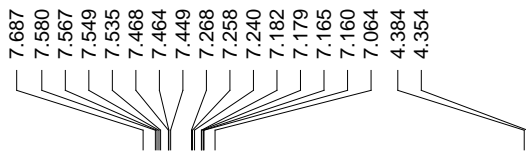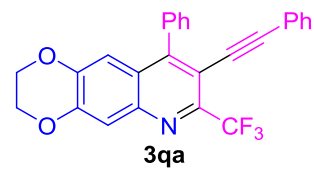

$^1\text{H NMR}$  (400 MHz,  $\text{CDCl}_3$ )

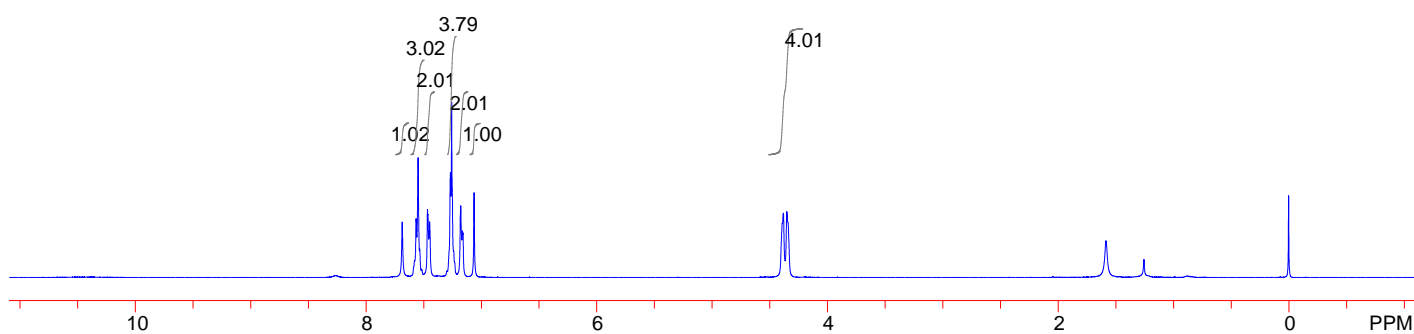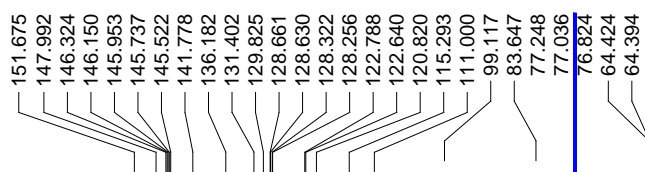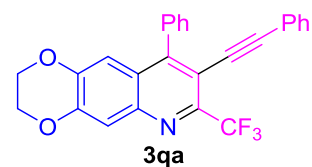

$^{13}\text{C}\{^1\text{H}\}$  (150 MHz,  $\text{CDCl}_3$ )

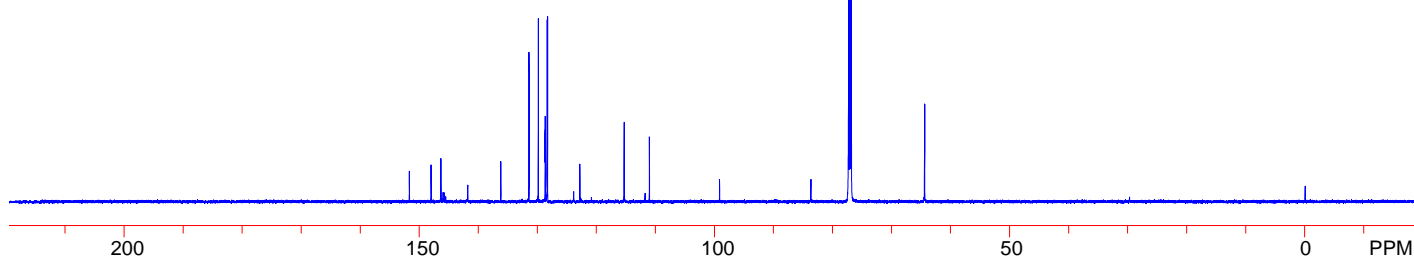

-65.870

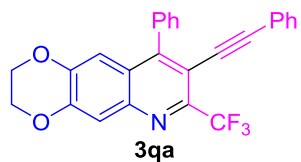

<sup>19</sup>F NMR (376 MHz, CDCl<sub>3</sub>)

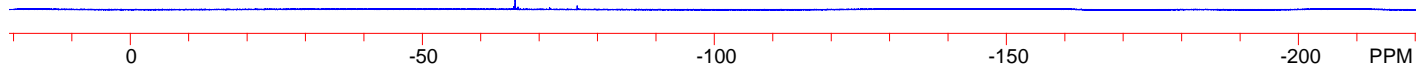

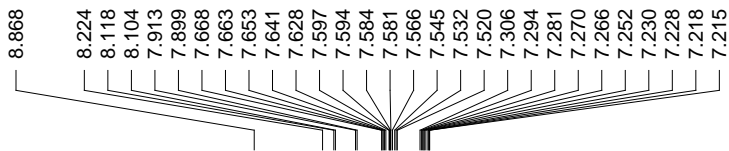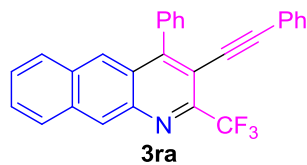

$^1\text{H}$  NMR (600 MHz,  $\text{CDCl}_3$ )

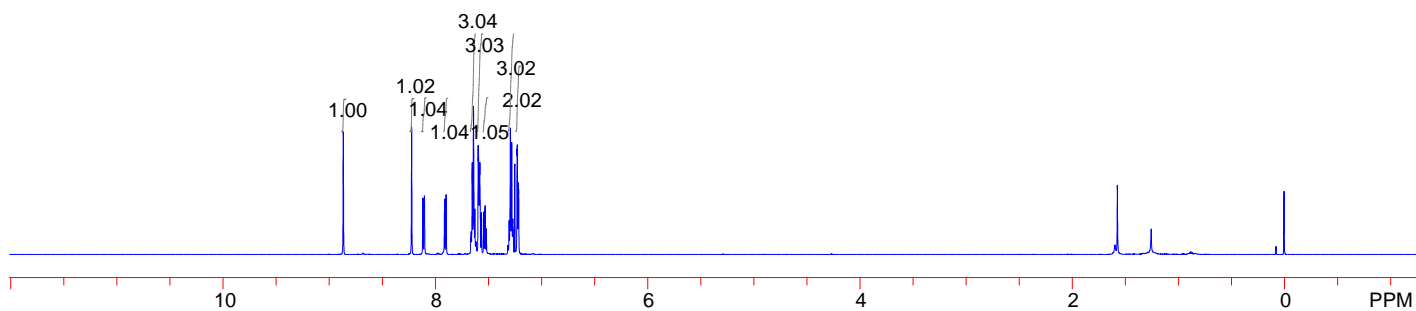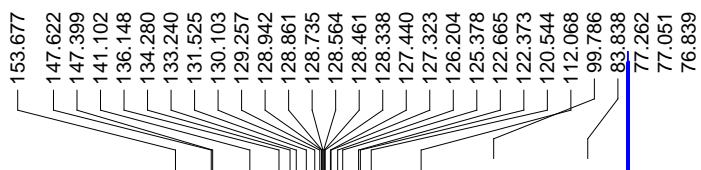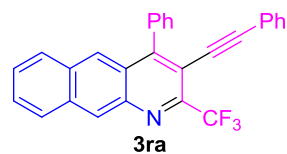

$^{13}\text{C}\{^1\text{H}\}$  (150 MHz,  $\text{CDCl}_3$ )

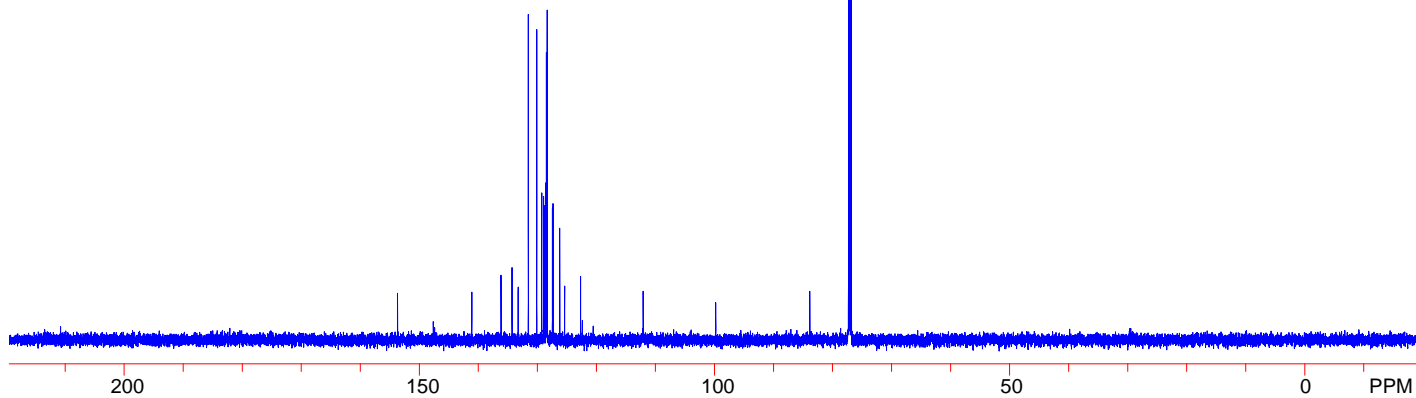

-66.494

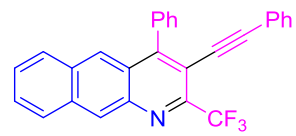

**3ra**  
<sup>19</sup>F NMR (565 MHz, CDCl<sub>3</sub>)

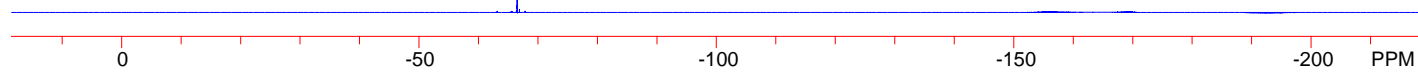

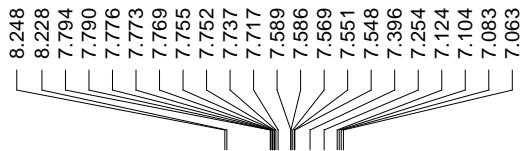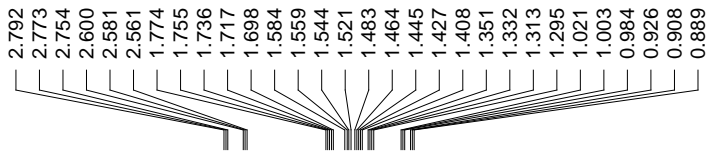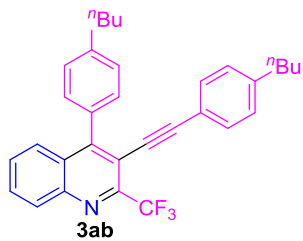

$^1\text{H NMR}$  (400 MHz,  $\text{CDCl}_3$ )

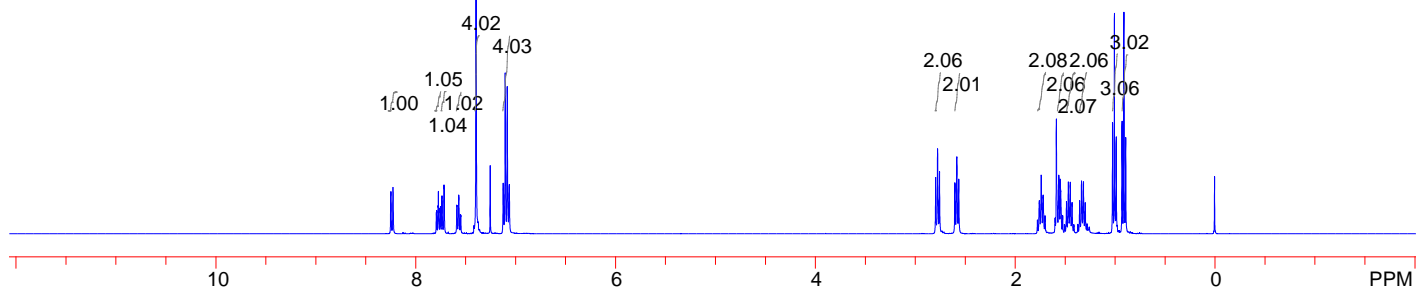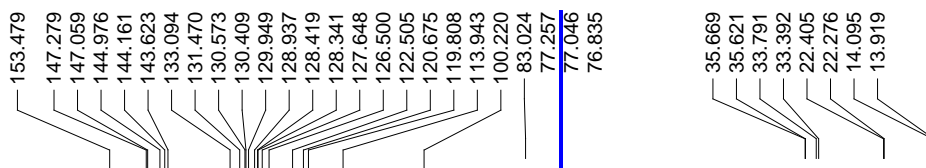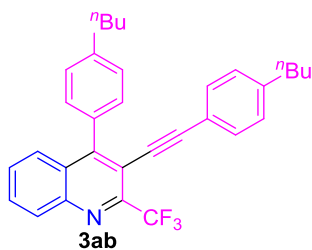

$^{13}\text{C}\{^1\text{H}\}$  (150 MHz,  $\text{CDCl}_3$ )

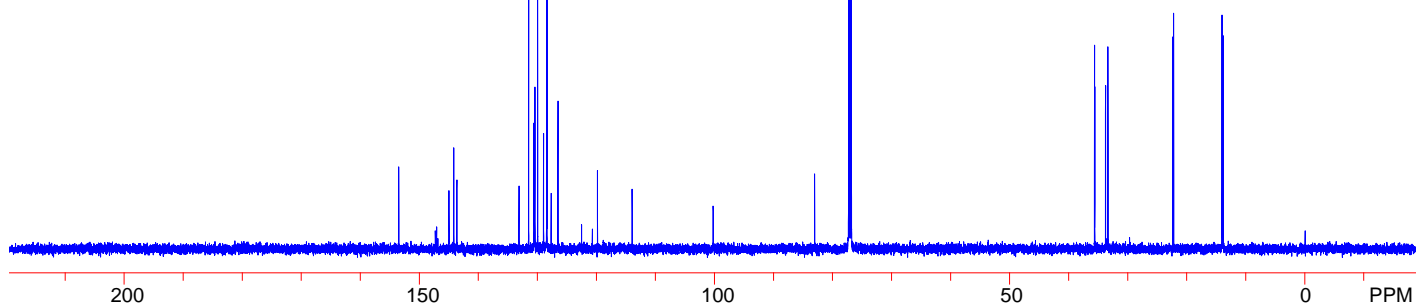

66.197

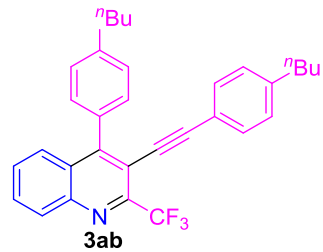

<sup>19</sup>F NMR (565 MHz, CDCl<sub>3</sub>)

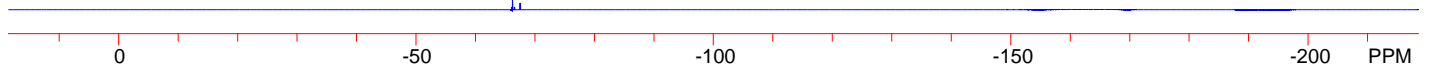

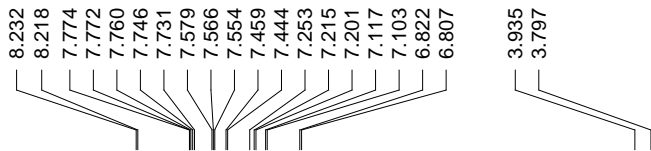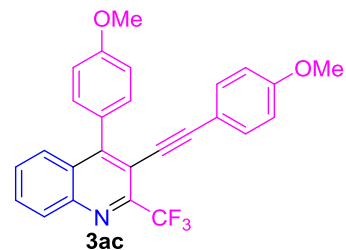

$^1\text{H NMR}$  (600 MHz,  $\text{CDCl}_3$ )

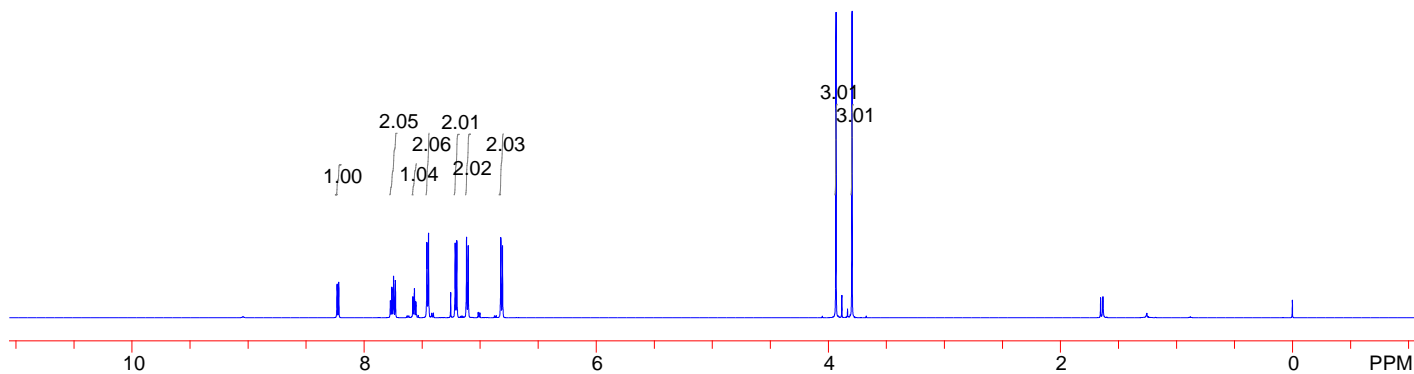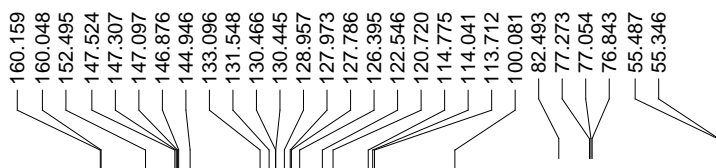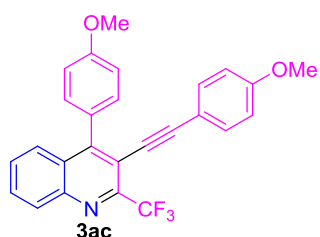

$^{13}\text{C}\{^1\text{H}\}$  (150 MHz,  $\text{CDCl}_3$ )

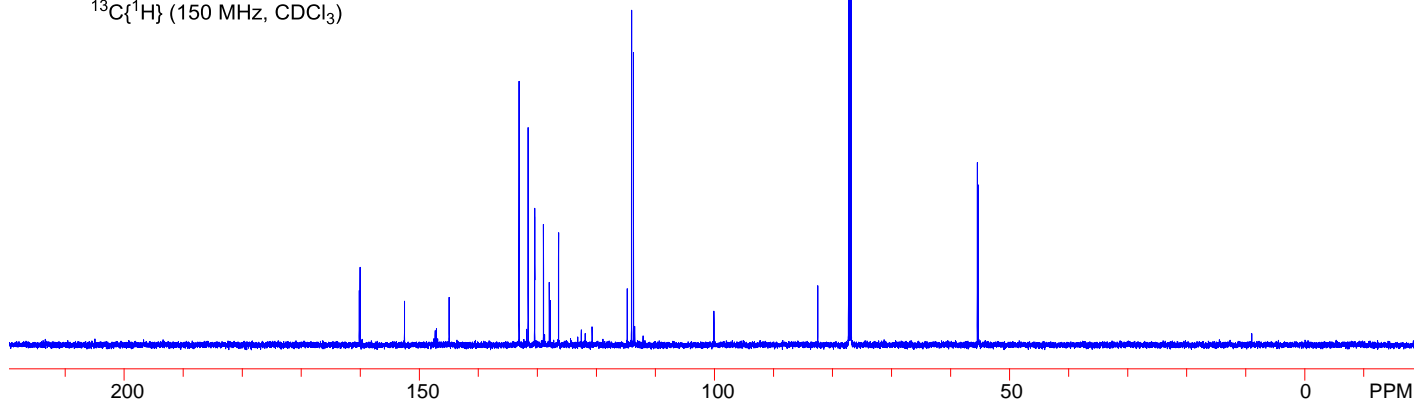

66.234

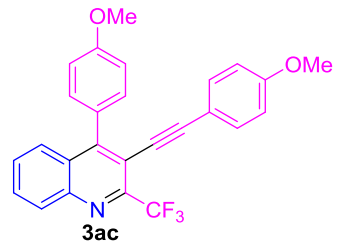

$^{19}\text{F}$  NMR (565 MHz,  $\text{CDCl}_3$ )

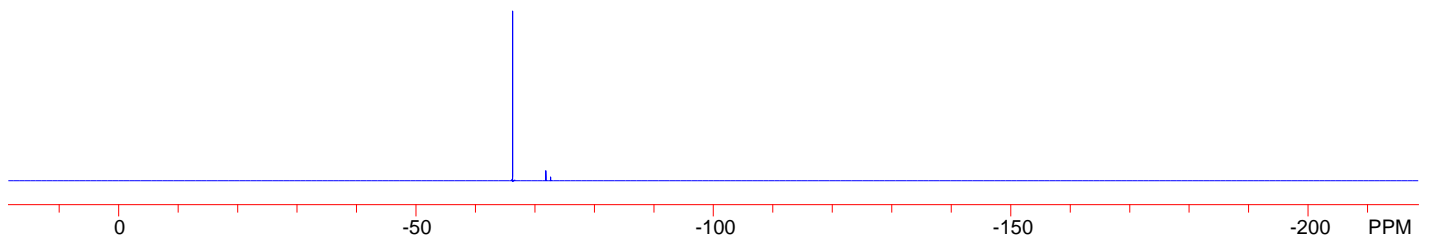



8.266  
8.252  
7.822  
7.819  
7.810  
7.808  
7.805  
7.796  
7.794  
7.663  
7.650  
7.620  
7.608  
7.596  
7.499  
7.496  
7.490  
7.485  
7.479  
7.476  
7.315  
7.301  
7.287  
7.256  
7.228  
7.224  
7.219  
7.213  
7.208  
7.204  
7.012  
6.997  
6.983

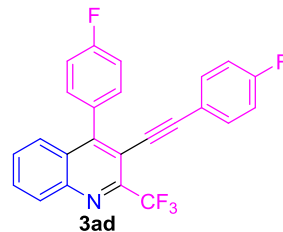

$^1\text{H NMR}$  (600 MHz,  $\text{CDCl}_3$ )

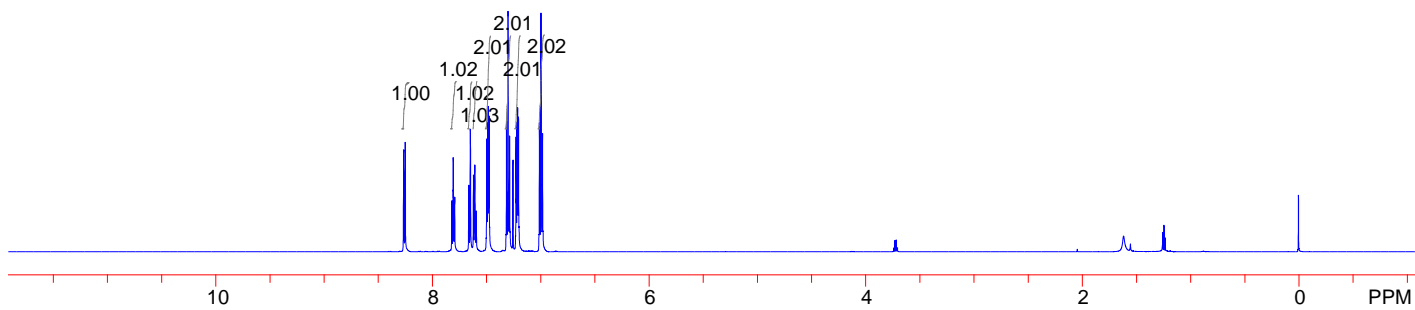

163.911  
163.809  
162.264  
162.148  
152.112  
147.266  
147.041  
145.054  
133.512  
133.457  
131.943  
131.889  
131.691  
131.671  
130.940  
130.590  
129.373  
127.437  
126.078  
124.231  
122.393  
120.566  
118.725  
118.485  
118.464  
115.900  
115.754  
115.612  
115.470  
113.659  
99.125  
82.887  
77.261  
77.049  
76.837

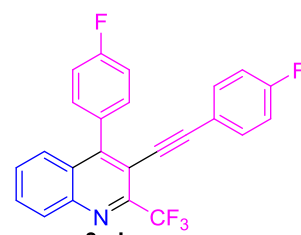

$^{13}\text{C}\{^1\text{H}\}$  (150 MHz,  $\text{CDCl}_3$ )

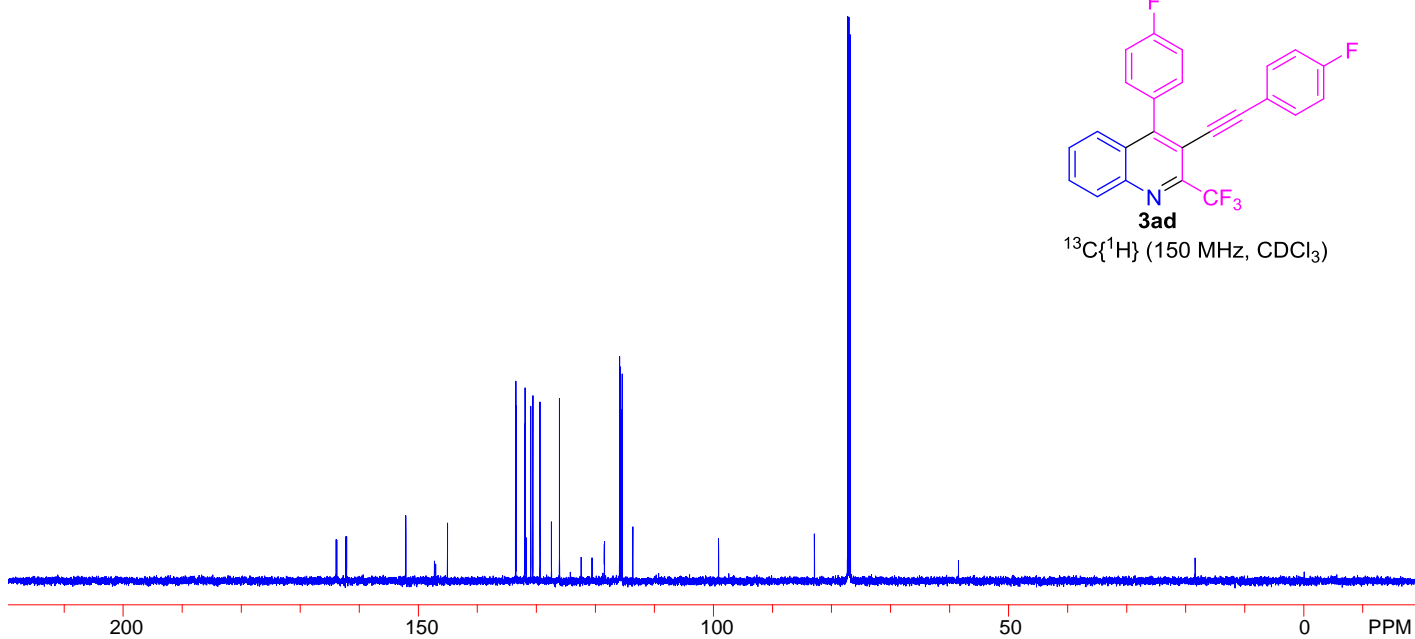

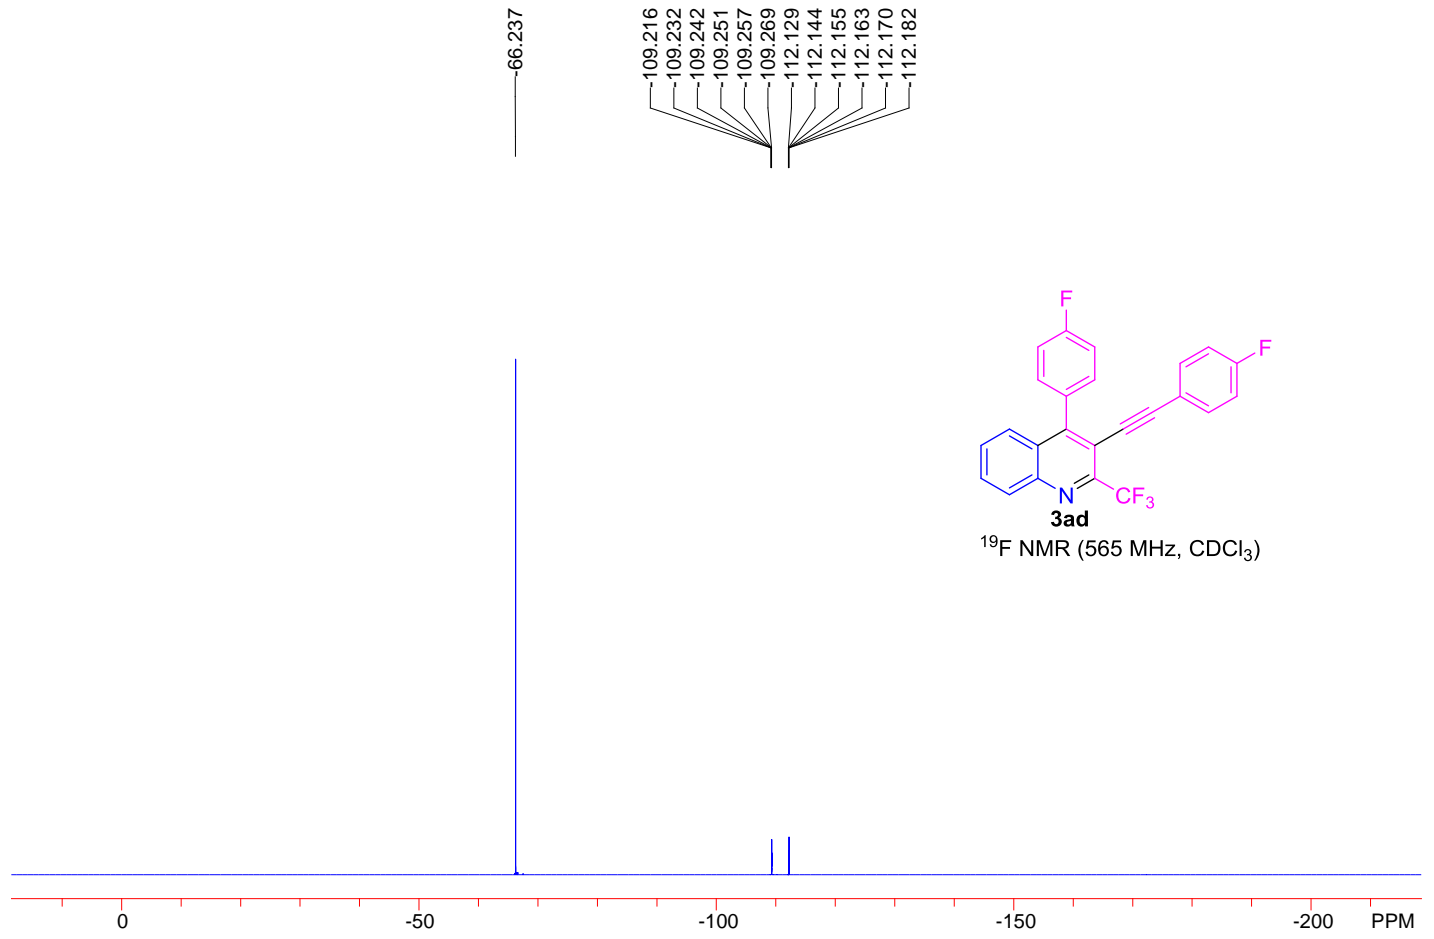

8.270  
8.256  
7.832  
7.830  
7.822  
7.819  
7.816  
7.807  
7.805  
7.654  
7.652  
7.640  
7.638  
7.626  
7.624  
7.615  
7.613  
7.610  
7.601  
7.599  
7.595  
7.591  
7.588  
7.580  
7.577  
7.573  
7.453  
7.449  
7.446  
7.439  
7.435  
7.431  
7.295  
7.291  
7.288  
7.280  
7.277  
7.273  
7.257  
7.161  
7.157  
7.154  
7.146  
7.143  
7.139

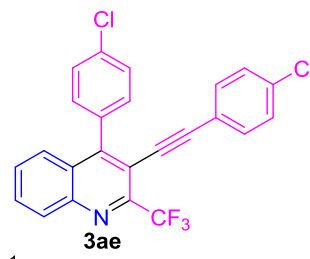

<sup>1</sup>H NMR (600 MHz, CDCl<sub>3</sub>)

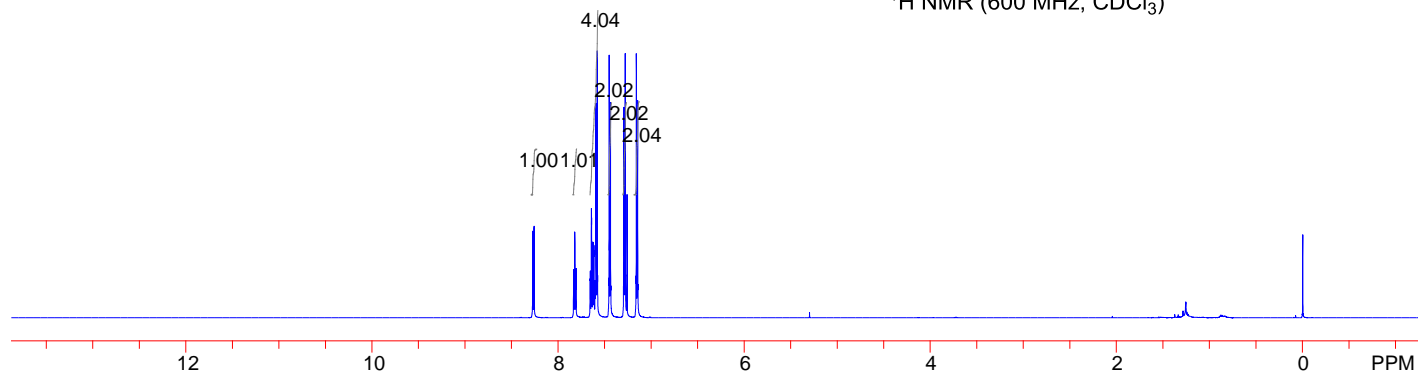

152.035  
147.264  
147.045  
145.099  
135.271  
135.151  
134.131  
132.692  
131.408  
131.081  
130.640  
129.472  
128.845  
128.713  
127.188  
126.027  
122.343  
120.760  
120.510  
113.341  
99.148  
83.964  
77.253  
77.041  
76.830

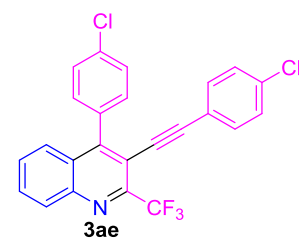

<sup>13</sup>C{<sup>1</sup>H} (150 MHz, CDCl<sub>3</sub>)

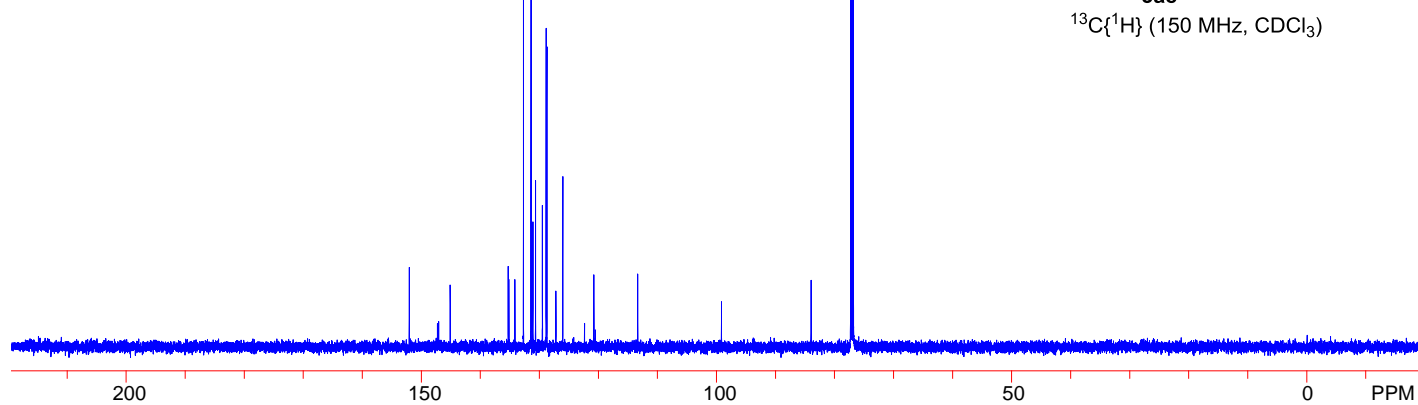

66.204

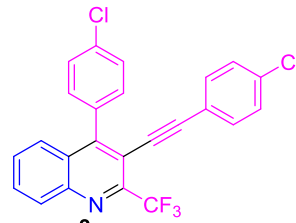

$^{19}\text{F}$  NMR (565 MHz,  $\text{CDCl}_3$ )

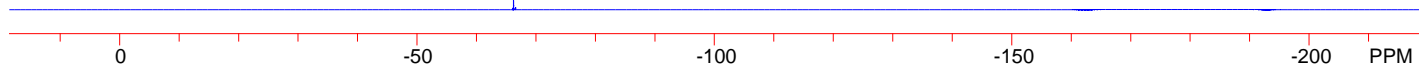

8.273  
8.252  
7.840  
7.835  
7.824  
7.819  
7.814  
7.803  
7.798  
7.750  
7.728  
7.655  
7.638  
7.634  
7.630  
7.614  
7.612  
7.593  
7.455  
7.434  
7.386  
7.364  
7.257  
7.086  
7.065

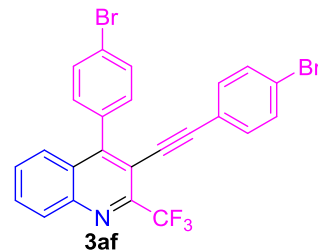

$^1\text{H NMR}$  (400 MHz,  $\text{CDCl}_3$ )

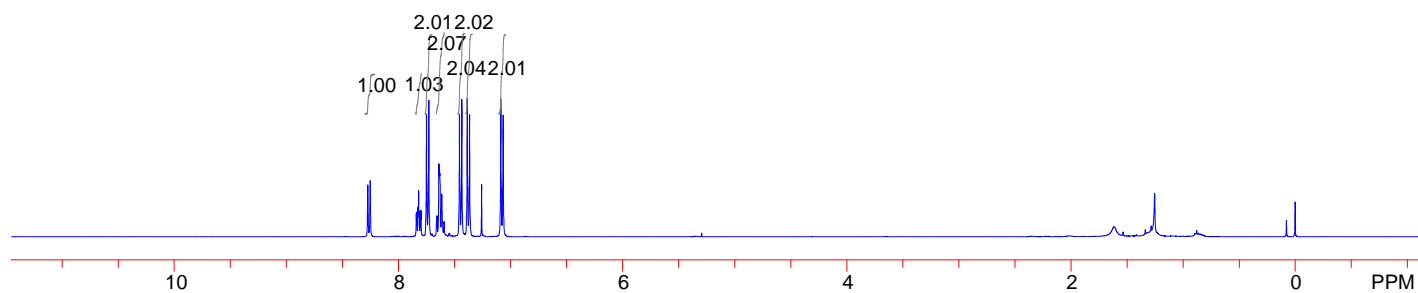

152.064  
147.237  
147.015  
145.097  
134.632  
132.870  
131.780  
131.684  
131.650  
131.121  
130.645  
129.503  
127.101  
126.019  
123.563  
123.333  
122.330  
121.200  
120.498  
113.255  
99.255  
84.130  
77.265  
77.053  
76.841

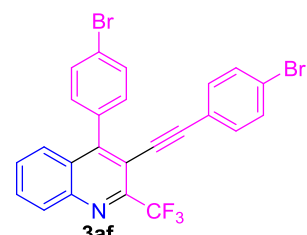

$^{13}\text{C}\{^1\text{H}\}$  (150 MHz,  $\text{CDCl}_3$ )

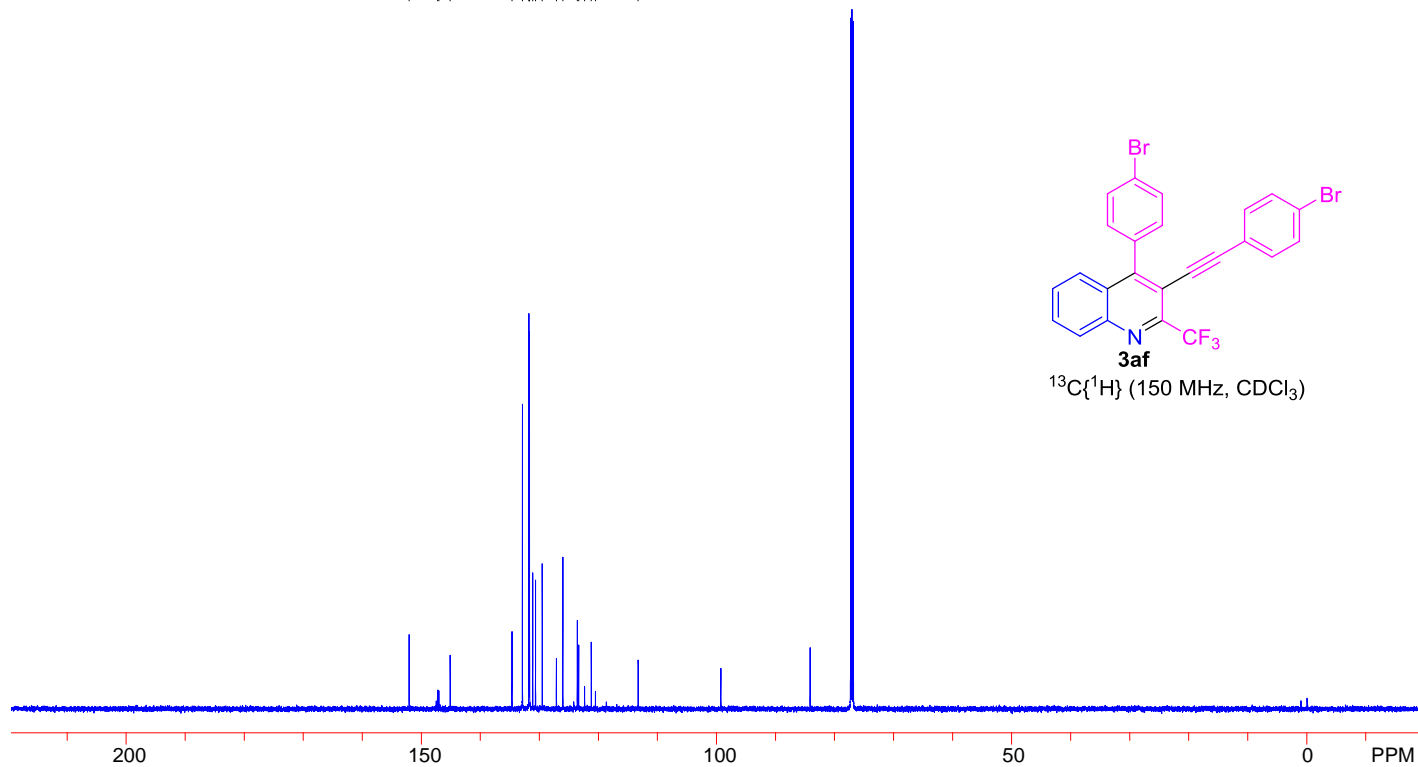

66.191

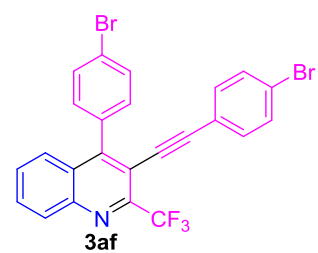

$^{19}\text{F}$  NMR (565 MHz,  $\text{CDCl}_3$ )

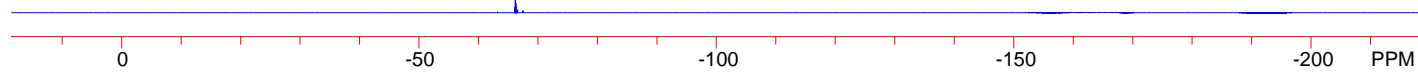

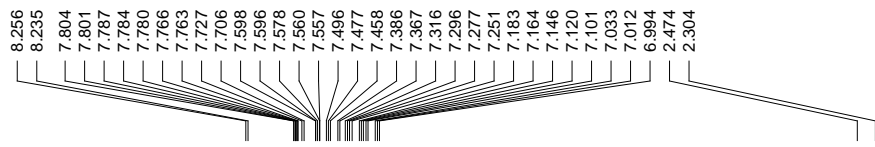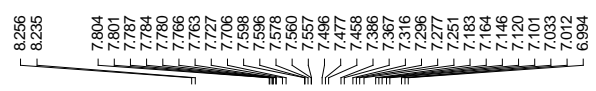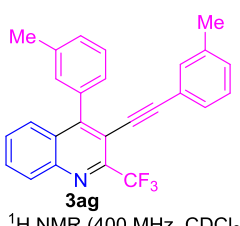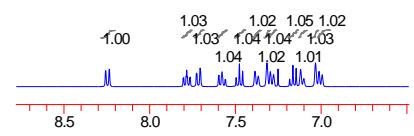

<sup>1</sup>H NMR (400 MHz, CDCl<sub>3</sub>)

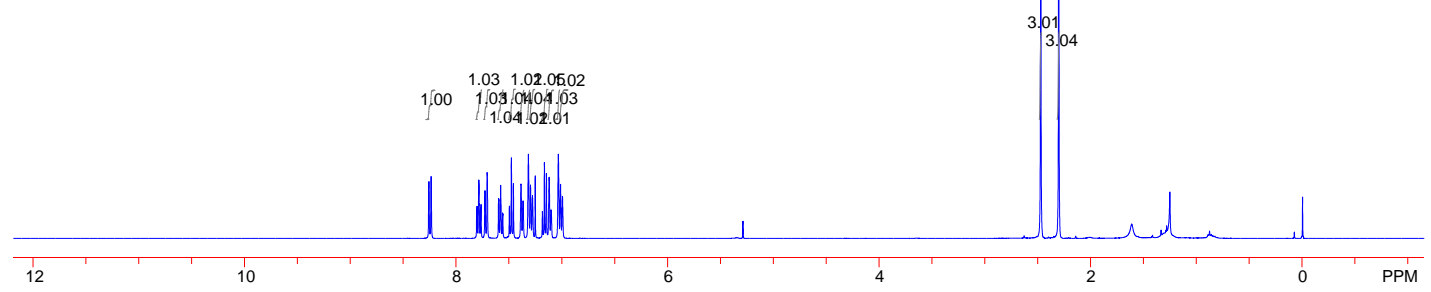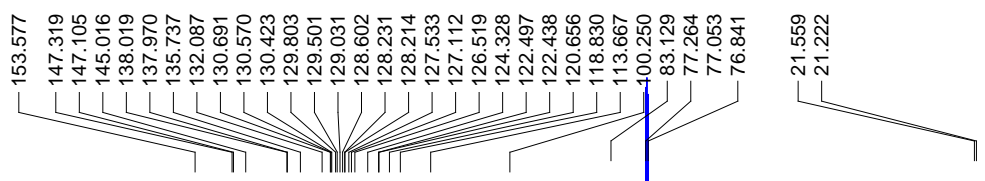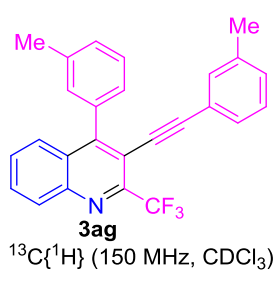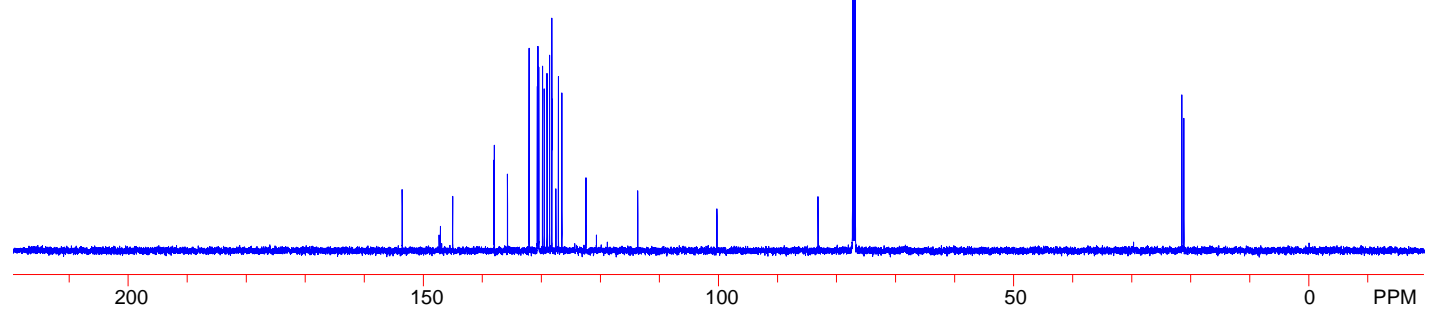

66.160

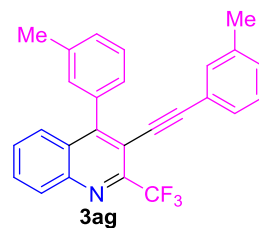

**3ag**  
<sup>19</sup>F NMR (565 MHz, CDCl<sub>3</sub>)

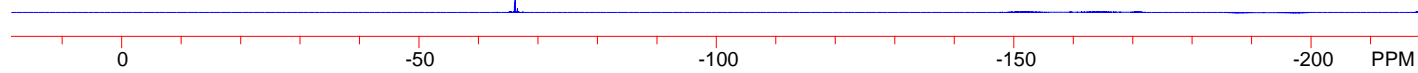



8.256  
8.242  
7.804  
7.801  
7.792  
7.790  
7.787  
7.778  
7.776  
7.739  
7.725  
7.600  
7.598  
7.589  
7.586  
7.584  
7.575  
7.573  
7.510  
7.497  
7.484  
7.250  
7.199  
7.186  
7.173  
7.113  
7.112  
7.109  
7.108  
7.099  
7.098  
7.095  
7.094  
7.069  
7.057  
7.049  
7.045  
7.042  
6.868  
6.864  
6.855  
6.844  
6.842  
6.712  
6.709  
6.708  
6.706  
3.847  
3.773

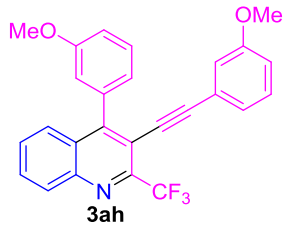

$^1\text{H NMR}$  (600 MHz,  $\text{CDCl}_3$ )

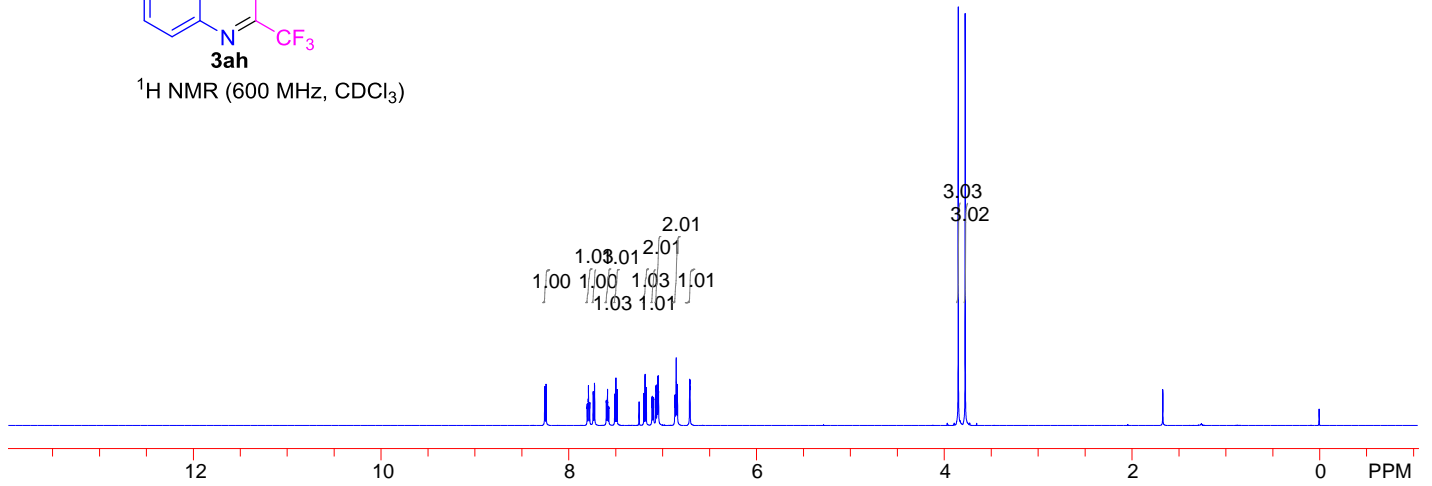

159.561  
159.289  
153.355  
147.294  
146.969  
145.052  
137.084  
130.845  
130.437  
129.479  
129.436  
129.170  
127.404  
126.441  
125.671  
124.062  
123.522  
122.916  
122.405  
120.168  
117.423  
116.198  
115.666  
115.273  
114.736  
113.487  
100.063  
83.121  
77.383  
77.065  
76.747  
55.448  
55.256

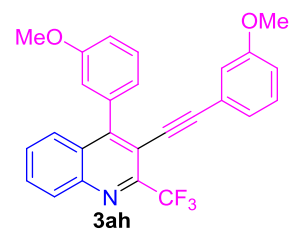

$^{13}\text{C}\{^1\text{H}\}$  (100 MHz,  $\text{CDCl}_3$ )

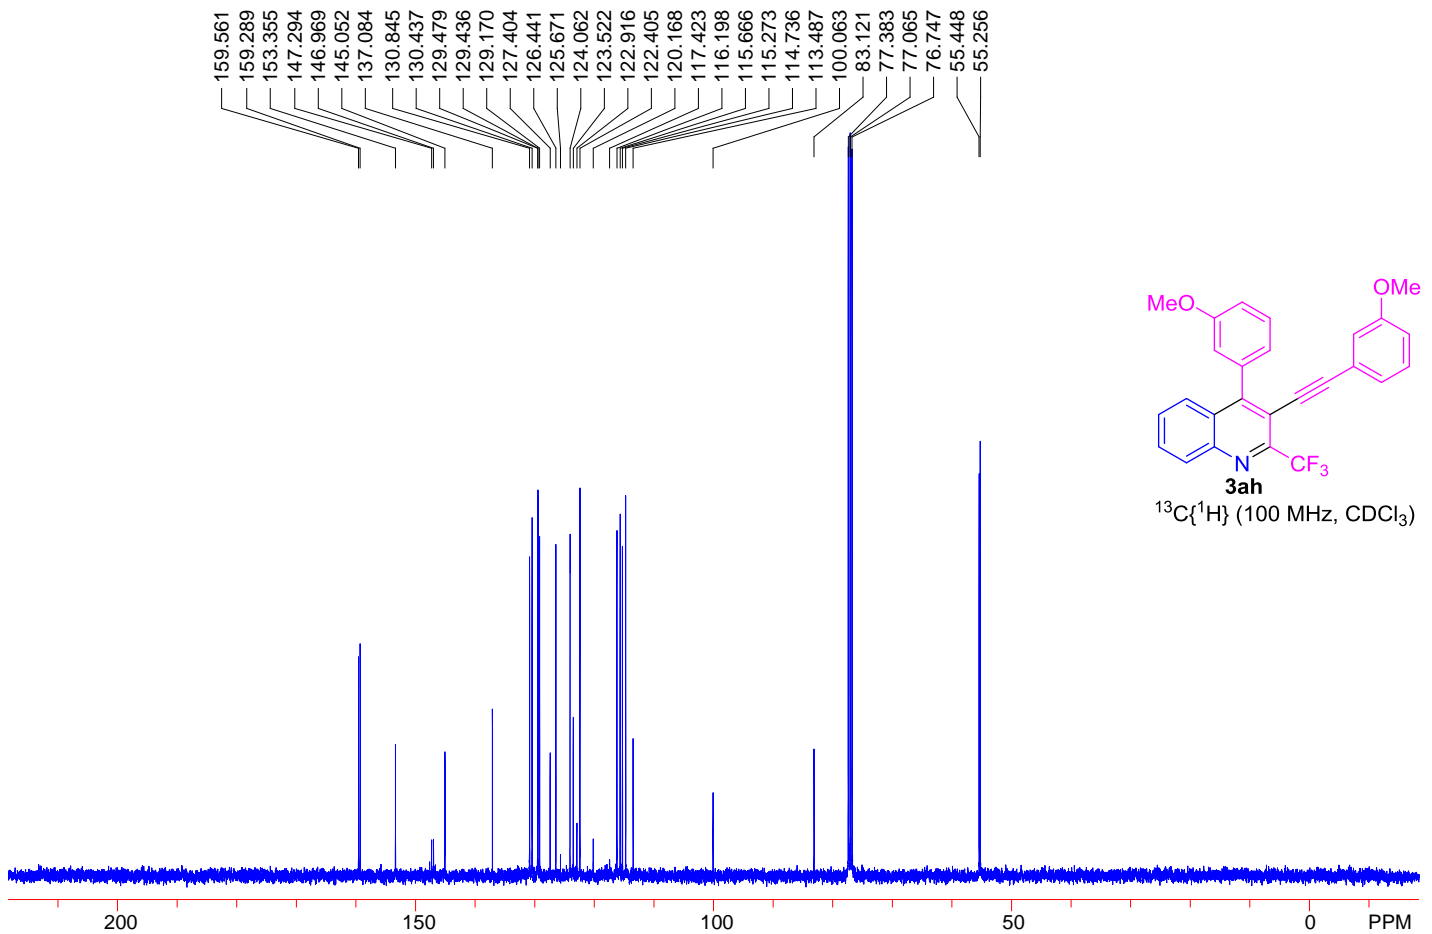

66.101

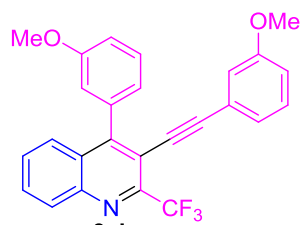

$^{19}\text{F}$  NMR (565 MHz,  $\text{CDCl}_3$ )

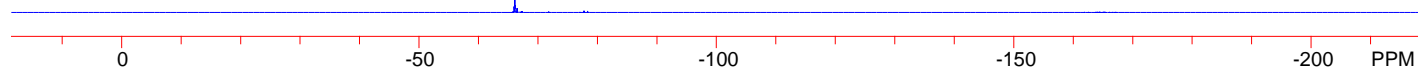

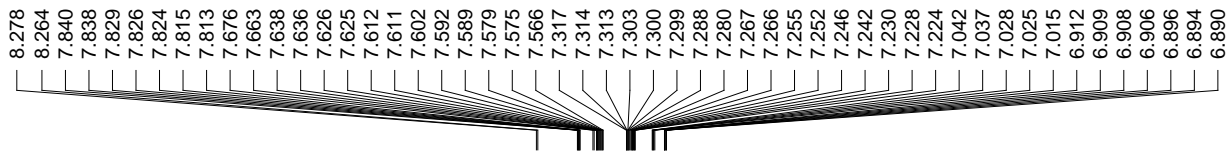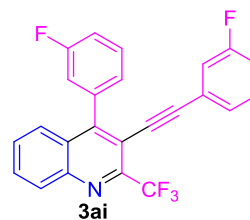

$^1\text{H NMR}$  (600 MHz,  $\text{CDCl}_3$ )

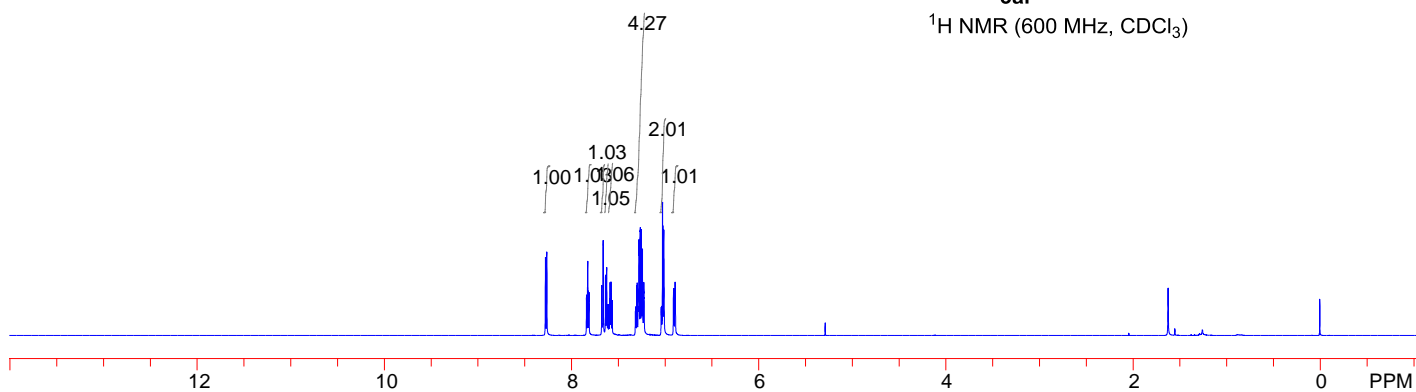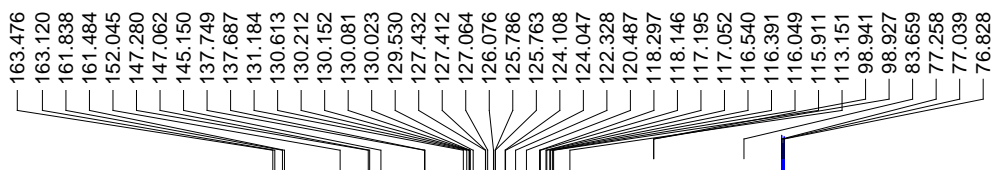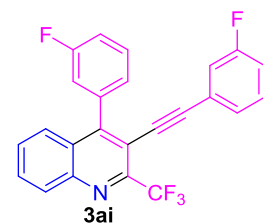

$^{13}\text{C}\{^1\text{H}\}$  (150 MHz,  $\text{CDCl}_3$ )

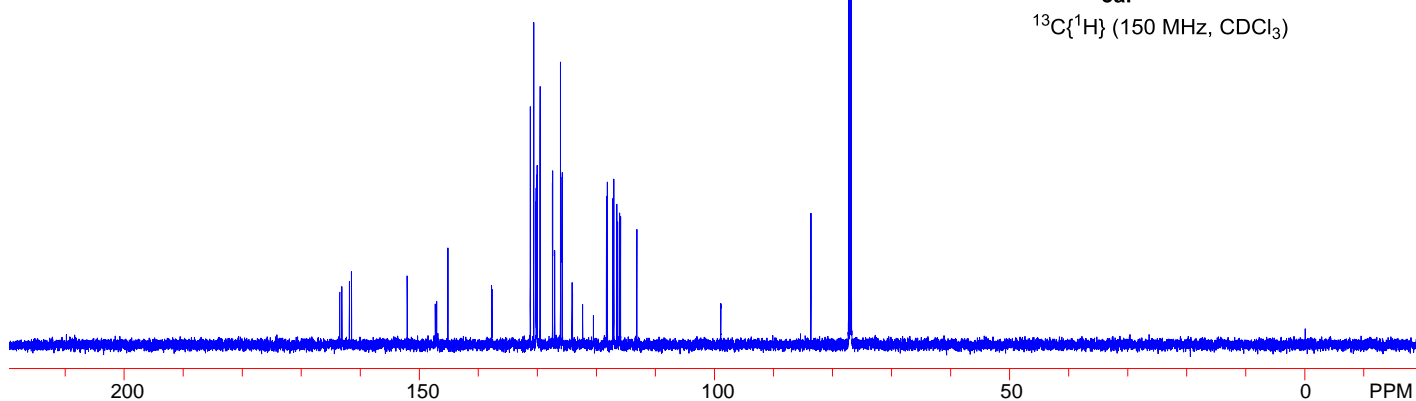

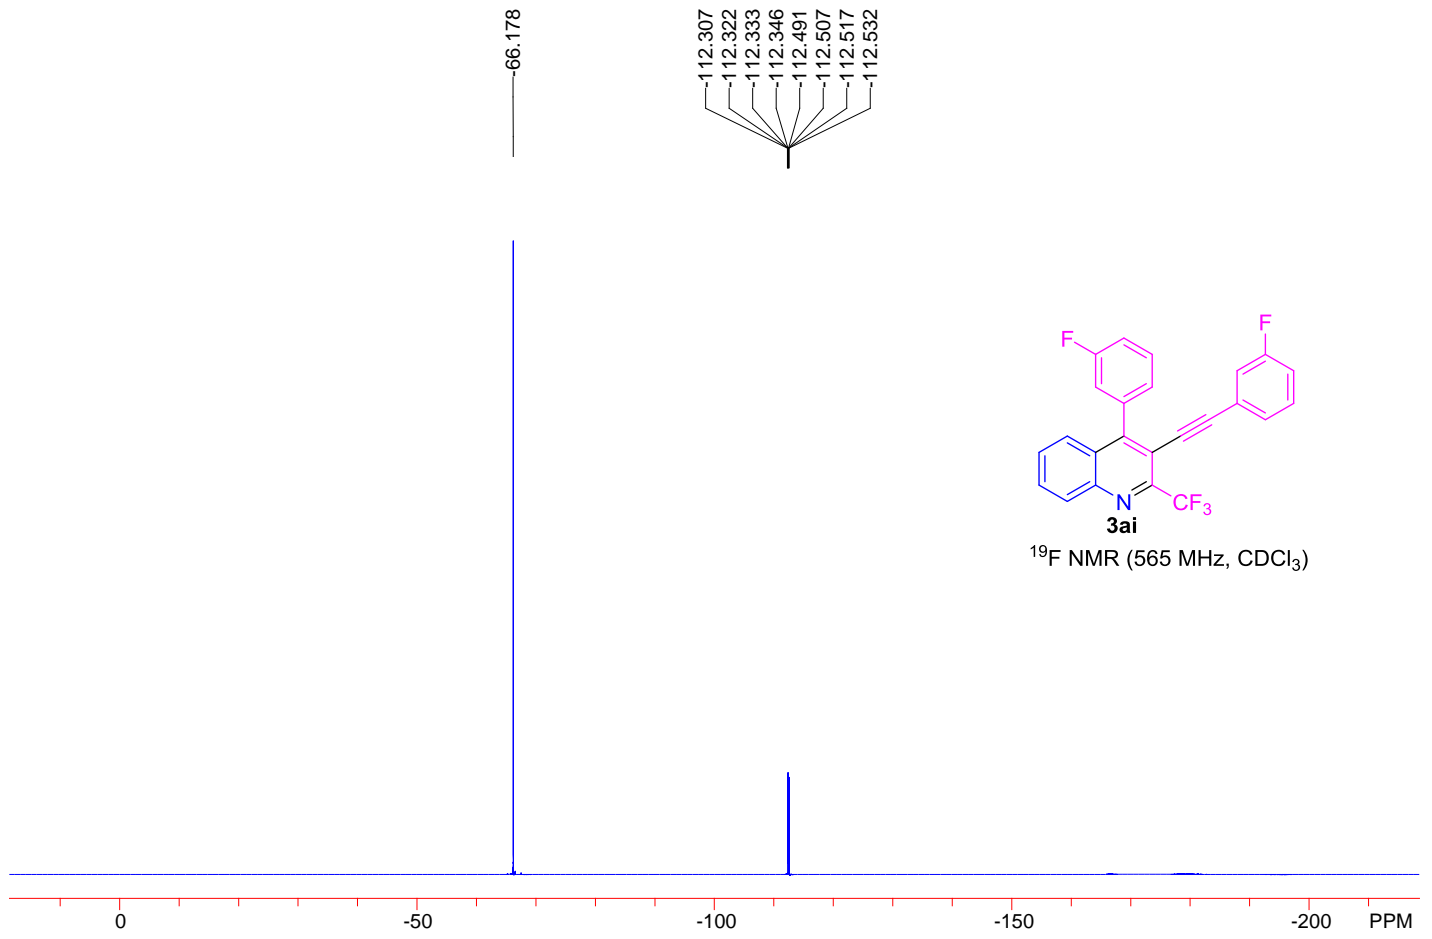

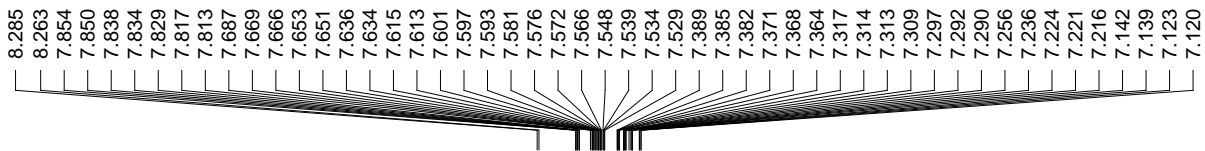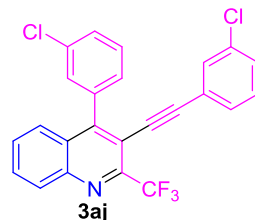

$^1\text{H}$  NMR (400 MHz,  $\text{CDCl}_3$ )

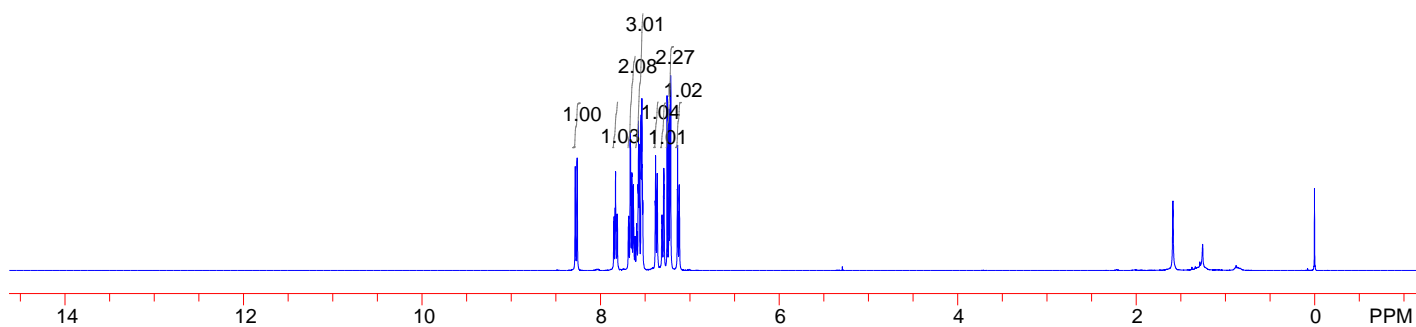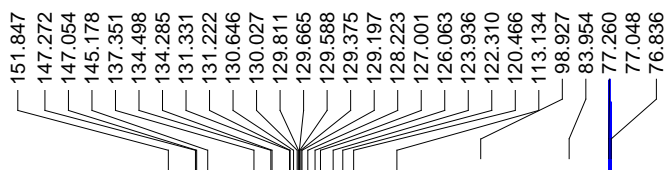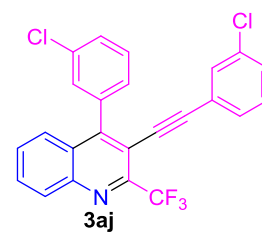

$^{13}\text{C}\{^1\text{H}\}$  (150 MHz,  $\text{CDCl}_3$ )

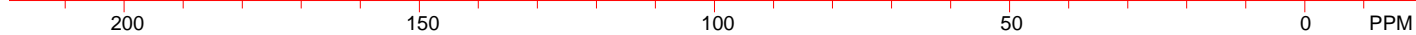

66.168

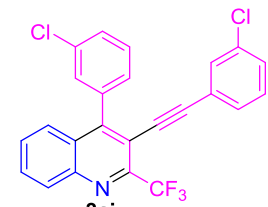

**3aj**  
<sup>19</sup>F NMR (376 MHz, CDCl<sub>3</sub>)

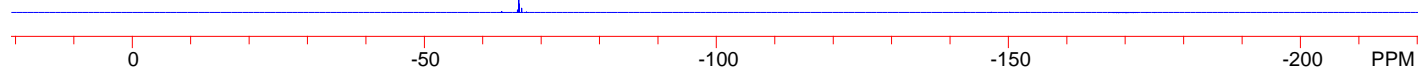

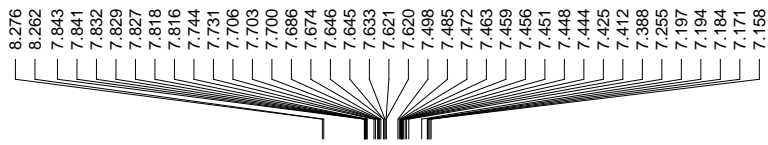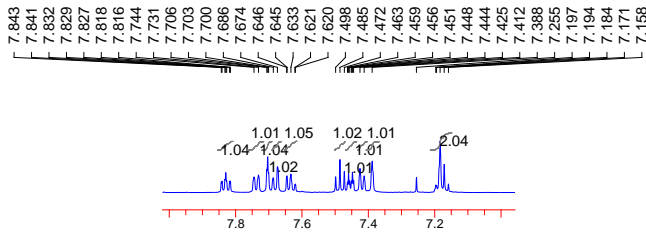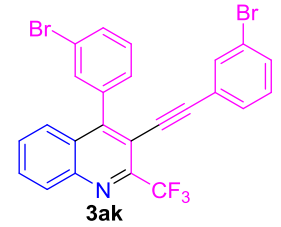

$^1\text{H NMR}$  (600 MHz,  $\text{CDCl}_3$ )

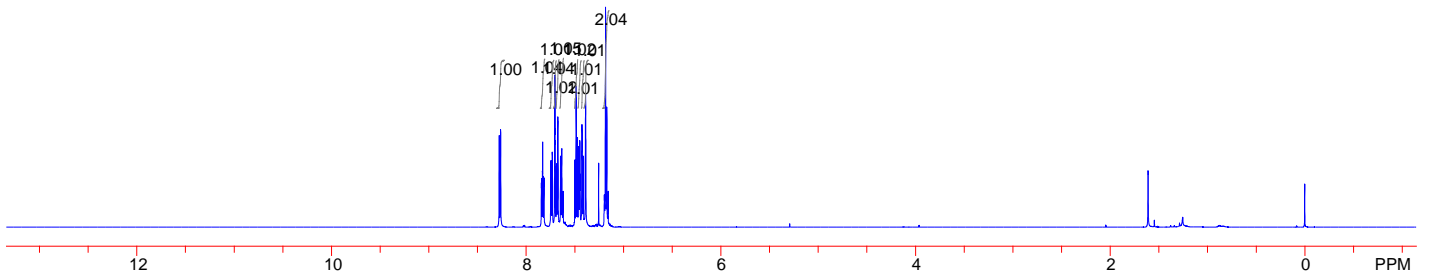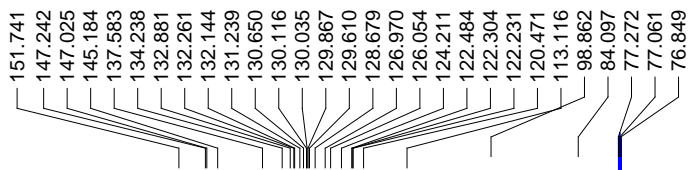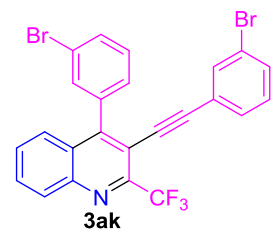

$^{13}\text{C}\{^1\text{H}\}$  (150 MHz,  $\text{CDCl}_3$ )

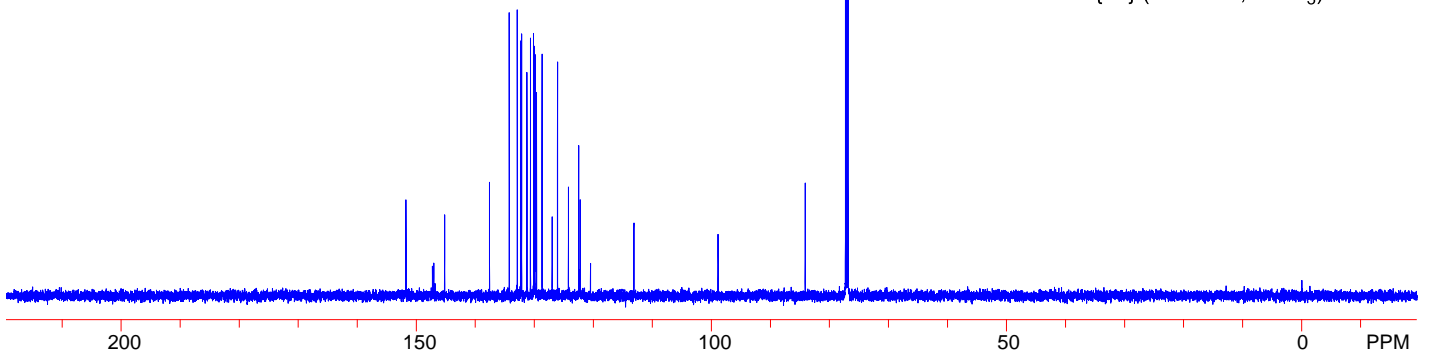

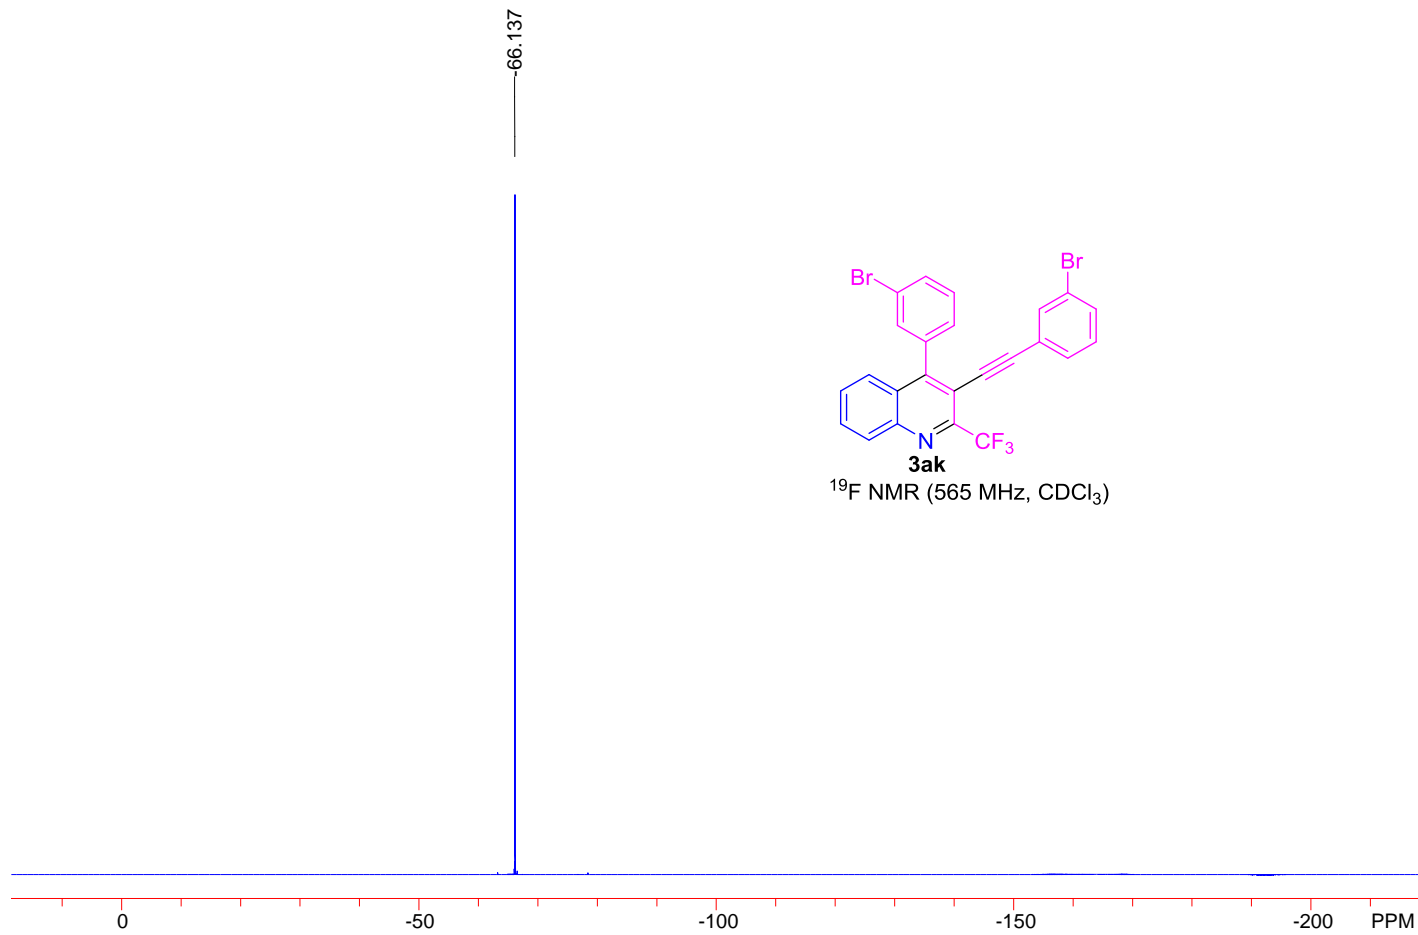



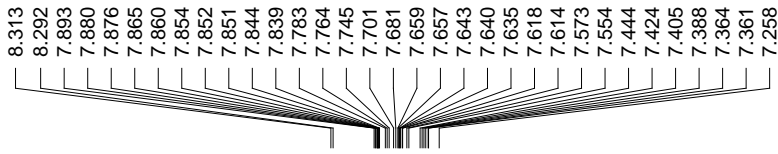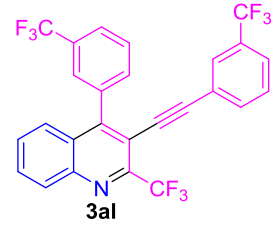

<sup>1</sup>H NMR (400 MHz, CDCl<sub>3</sub>)

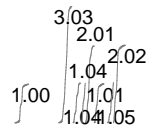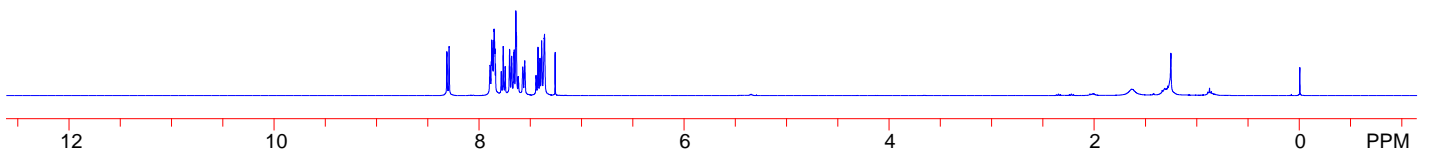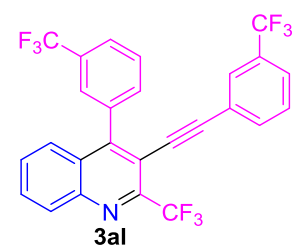

<sup>13</sup>C{<sup>1</sup>H} (150 MHz, CDCl<sub>3</sub>)

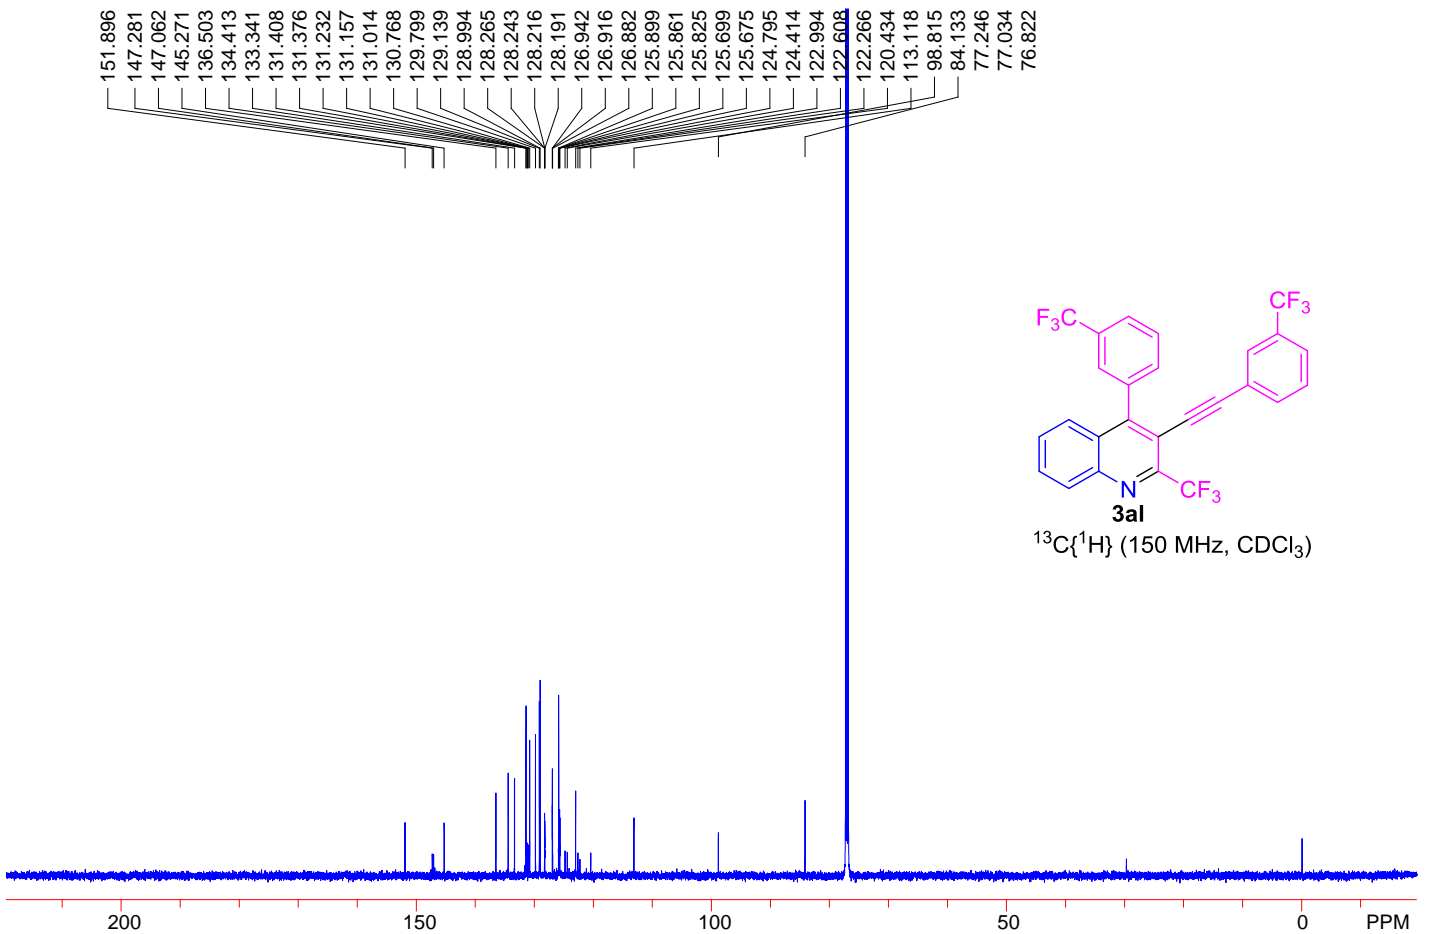

62.605  
63.179  
66.180

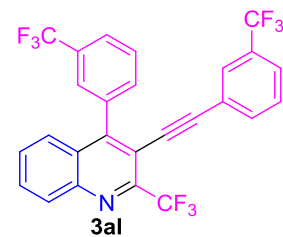

**3al**  
<sup>19</sup>F NMR (565 MHz, CDCl<sub>3</sub>)

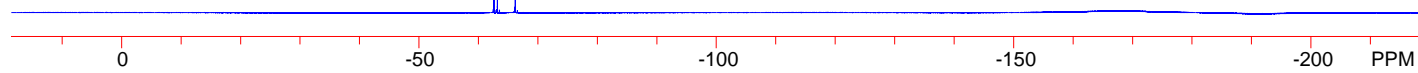

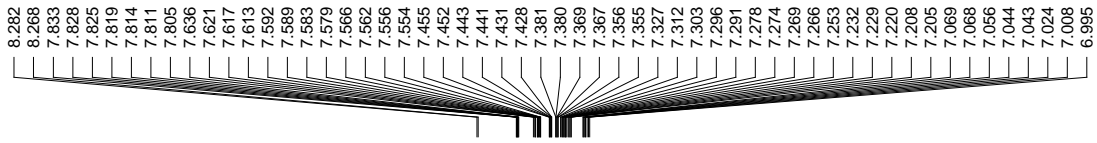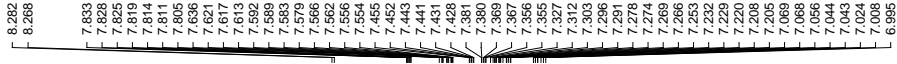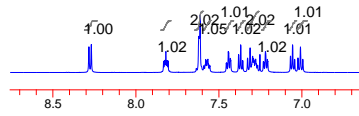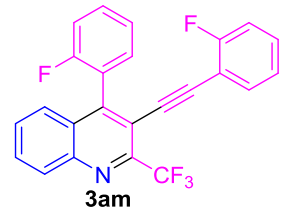

<sup>1</sup>H NMR (600 MHz, CDCl<sub>3</sub>)

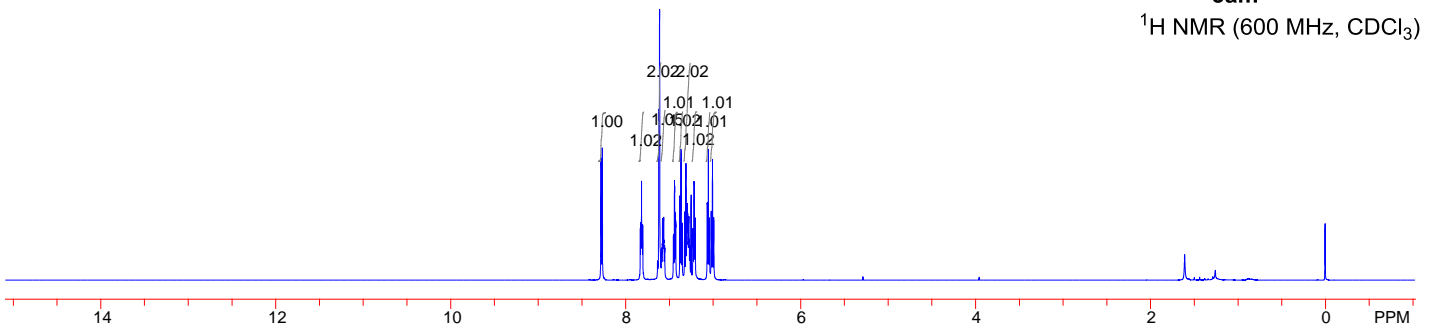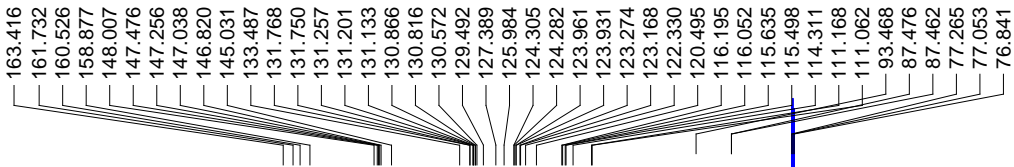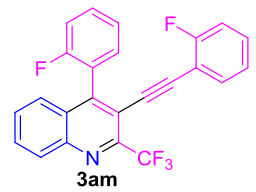

<sup>13</sup>C{<sup>1</sup>H} (150 MHz, CDCl<sub>3</sub>)

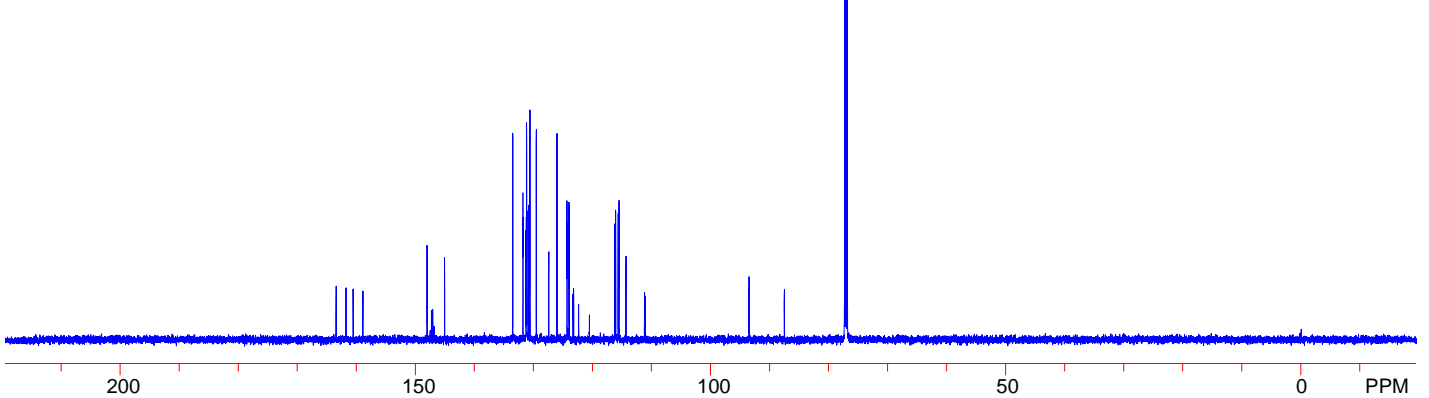

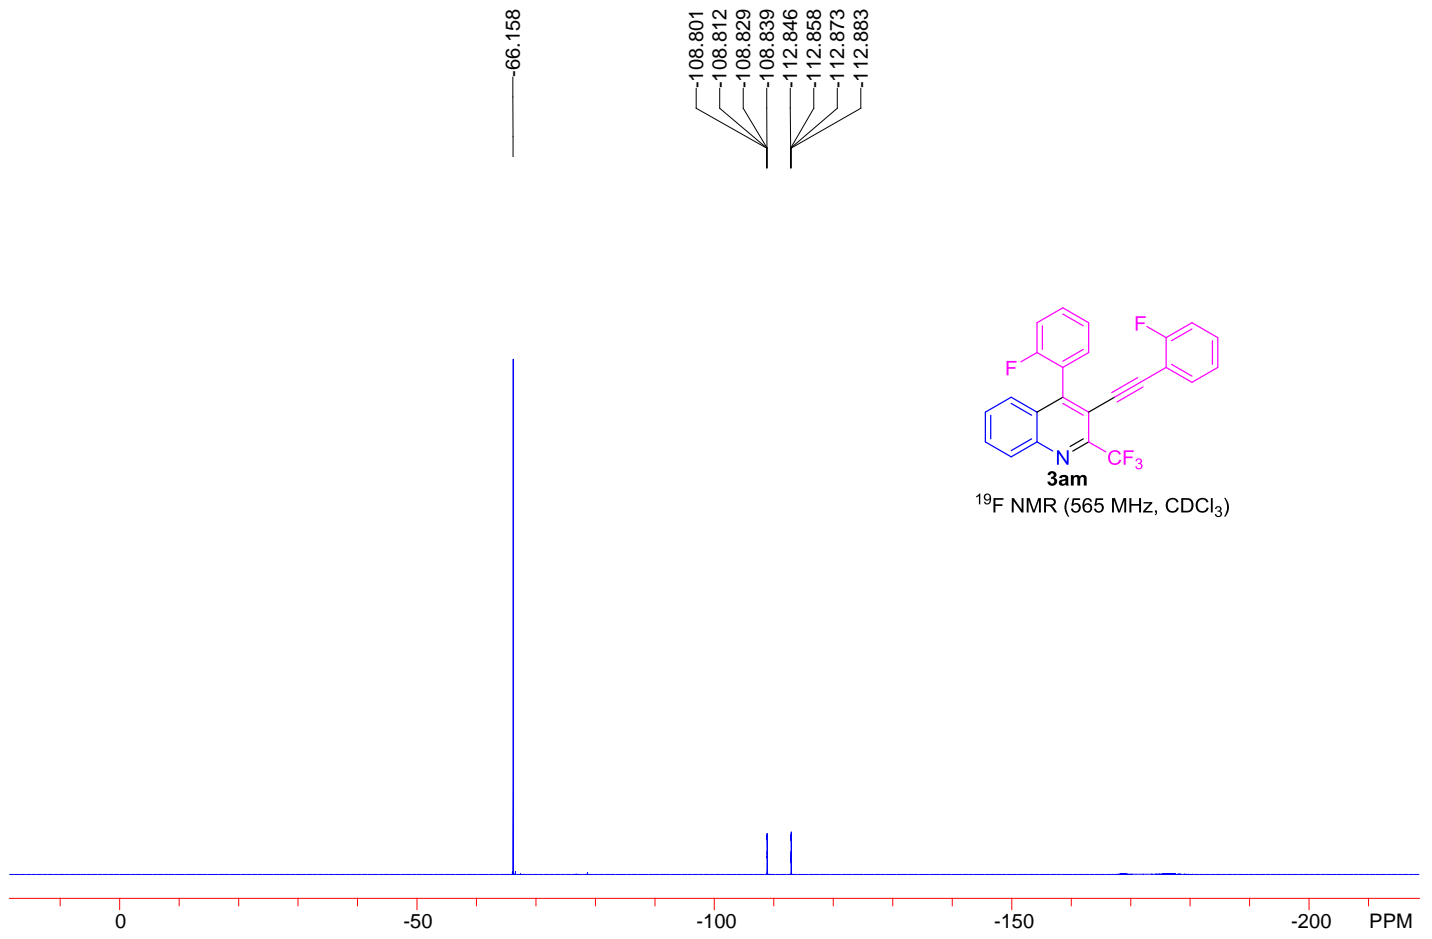

8.246  
8.232  
7.797  
7.795  
7.783  
7.769  
7.767  
7.608  
7.606  
7.594  
7.593  
7.582  
7.581  
7.270  
7.111  
7.108  
7.096  
7.082  
7.057  
7.054  
7.044  
7.040  
6.897  
6.894  
6.883  
6.880  
6.789  
6.775  
6.666  
6.666  
4.004  
3.889  
3.881  
3.851

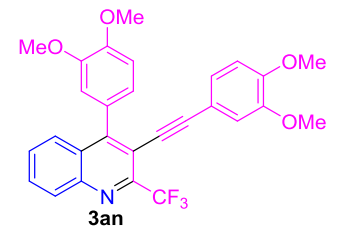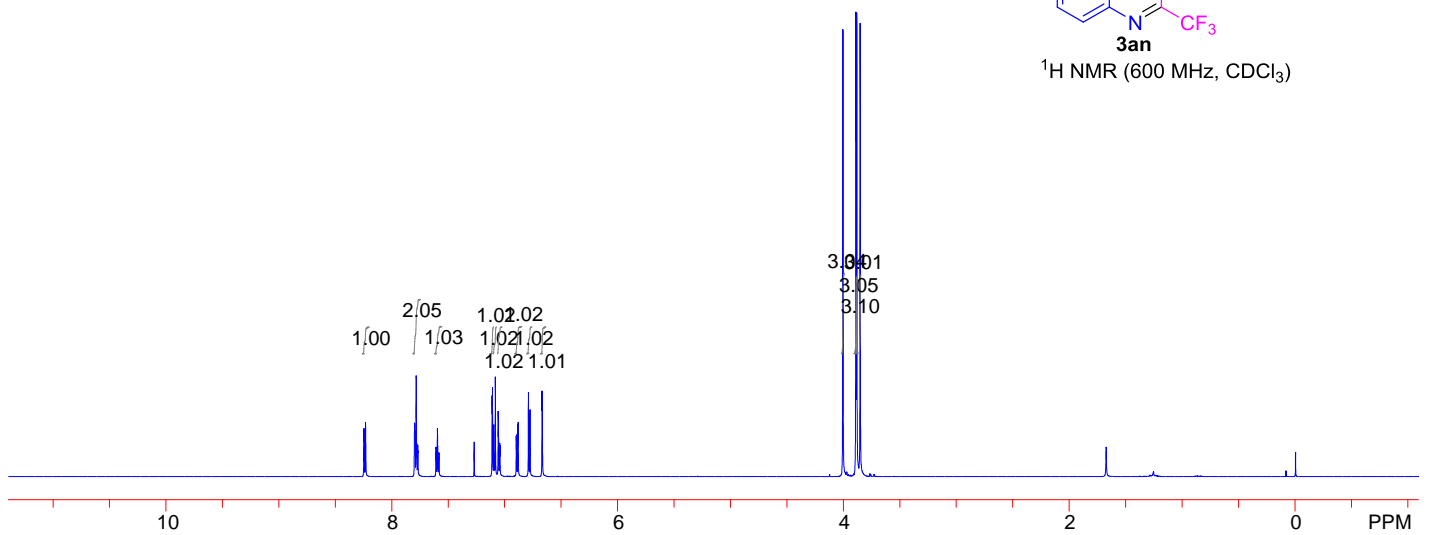

152.722  
150.113  
149.371  
148.753  
148.722  
147.118  
146.903  
144.964  
130.575  
130.456  
129.059  
128.283  
127.696  
126.376  
124.940  
122.897  
122.516  
120.682  
114.729  
113.953  
113.917  
113.479  
111.022  
110.838  
100.474  
82.485  
77.294  
77.083  
76.870  
56.090  
56.028  
55.939  
55.793

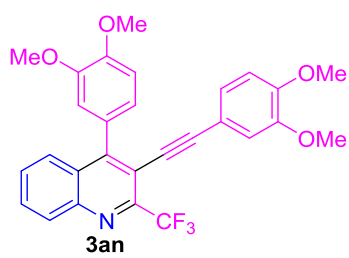

<sup>13</sup>C{<sup>1</sup>H} (150 MHz, CDCl<sub>3</sub>)

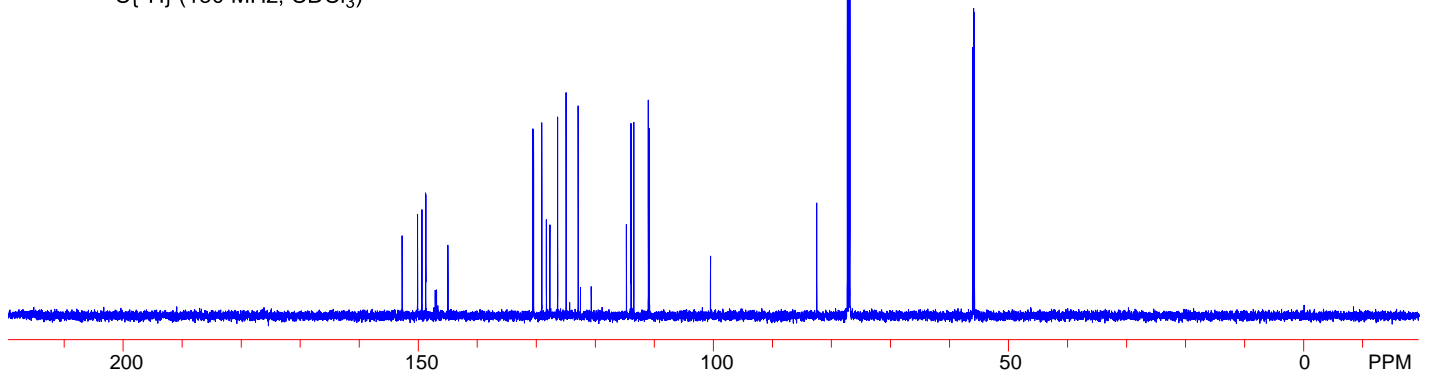

66.157

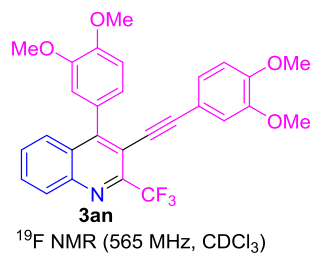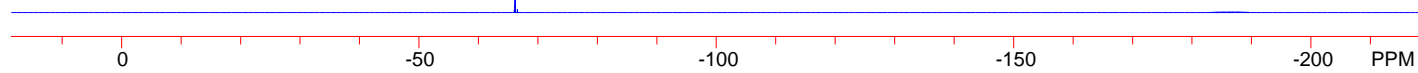

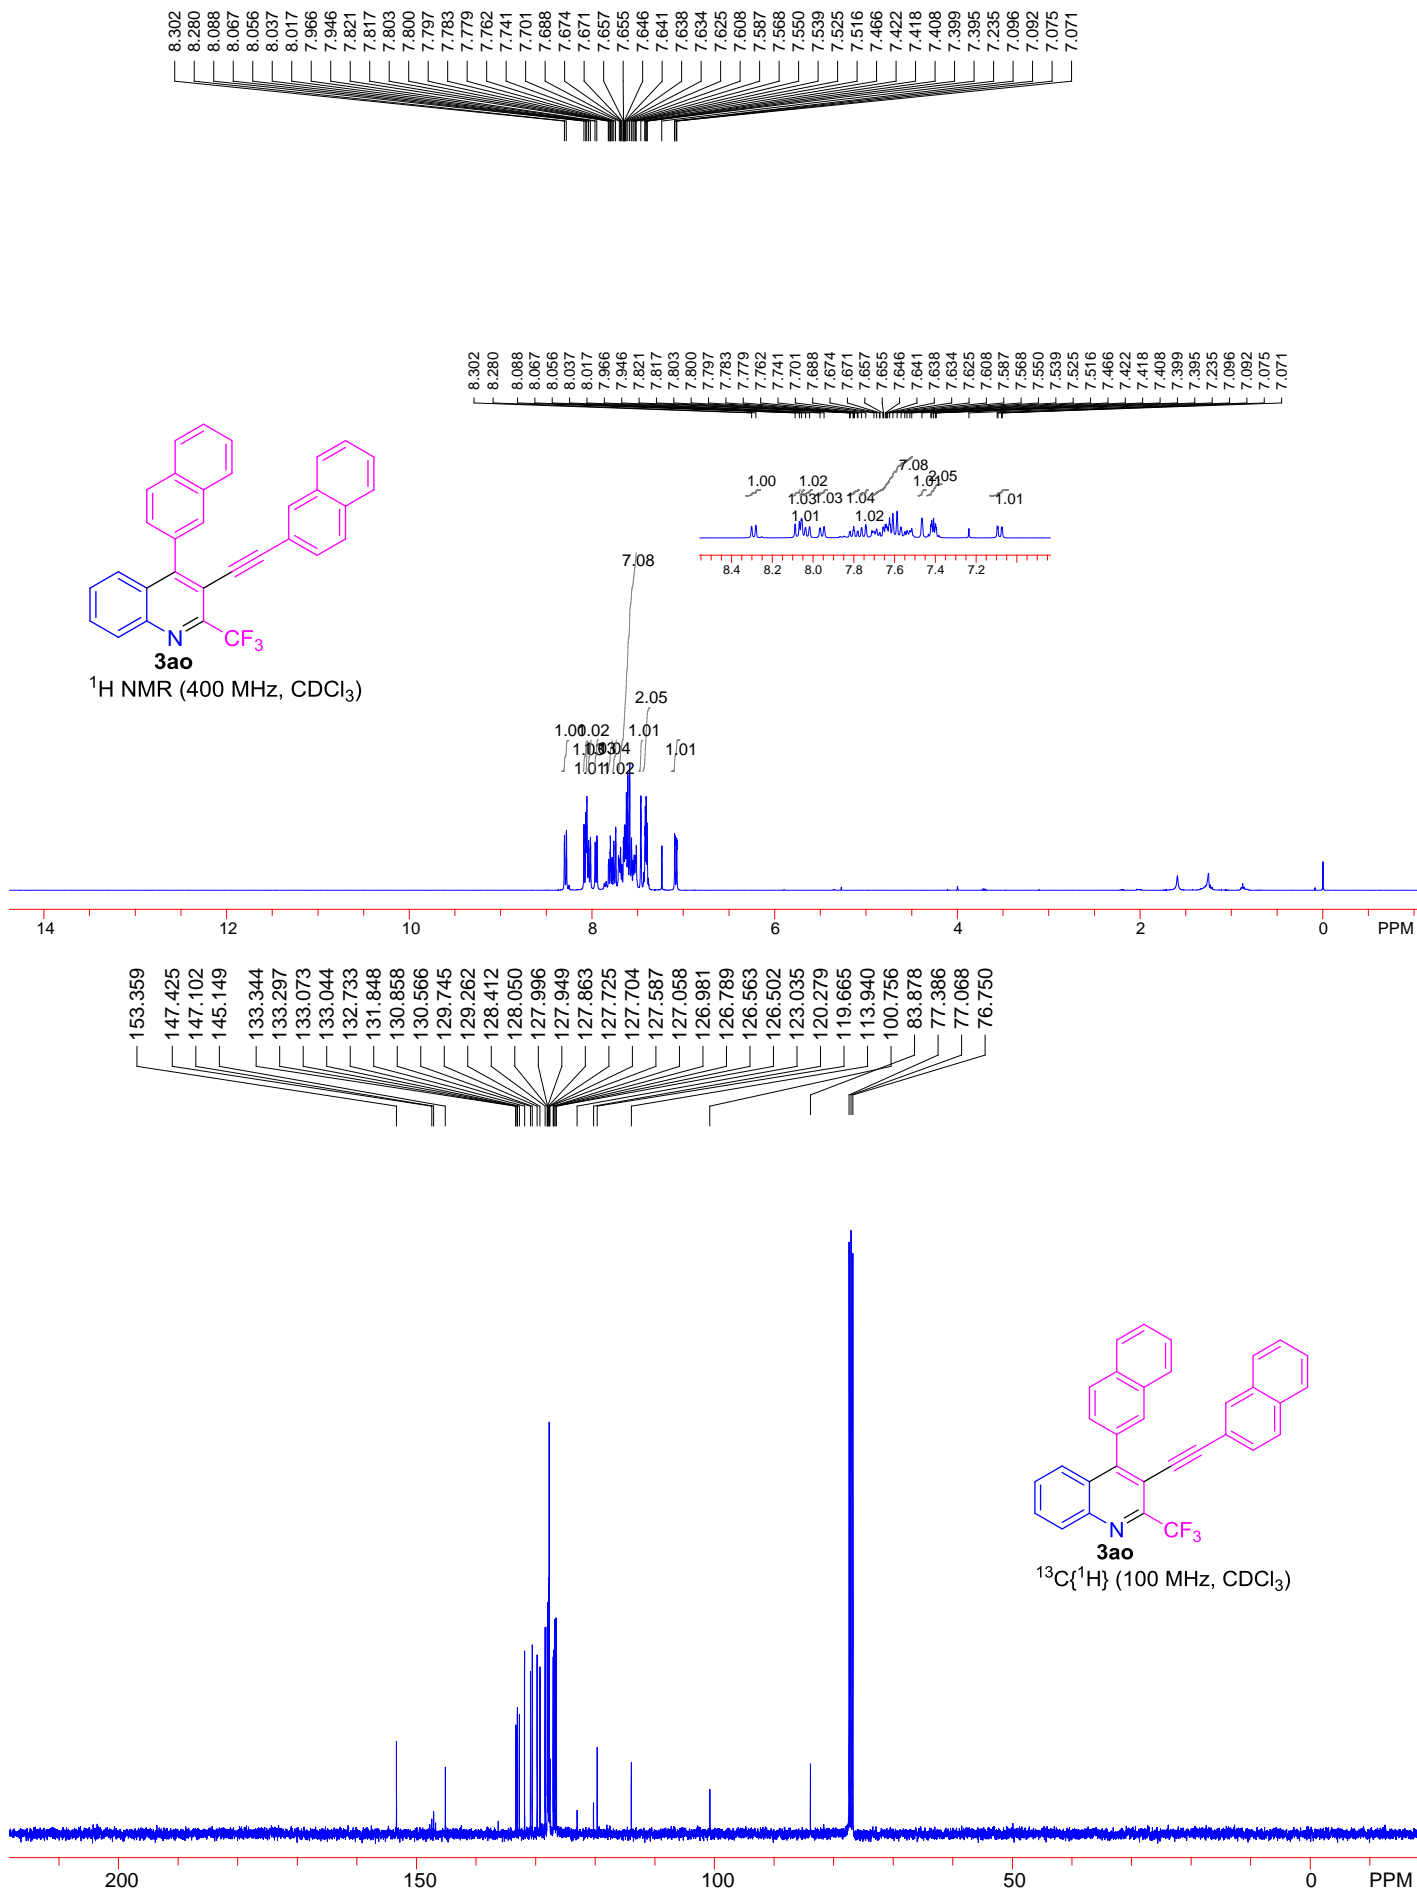

65.991

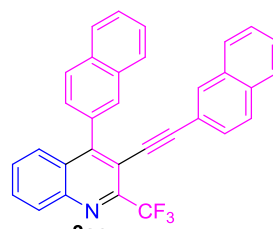

<sup>19</sup>F NMR (376 MHz, CDCl<sub>3</sub>)

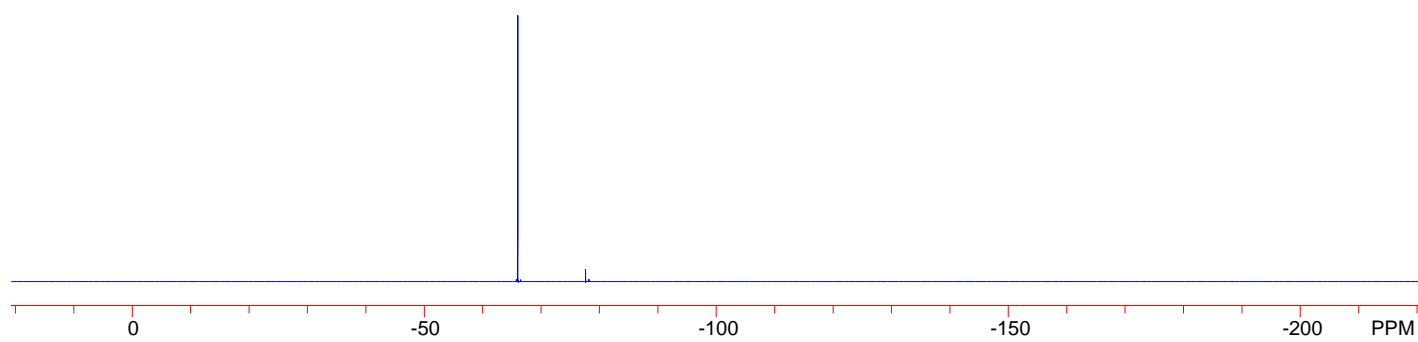



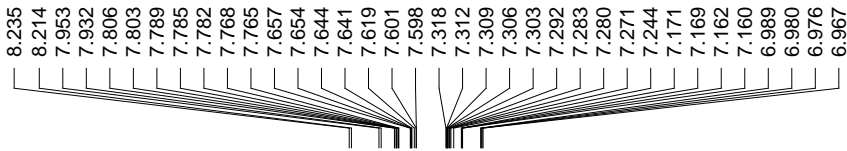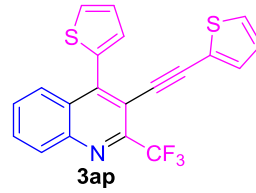

$^1\text{H}$  NMR (400 MHz,  $\text{CDCl}_3$ )

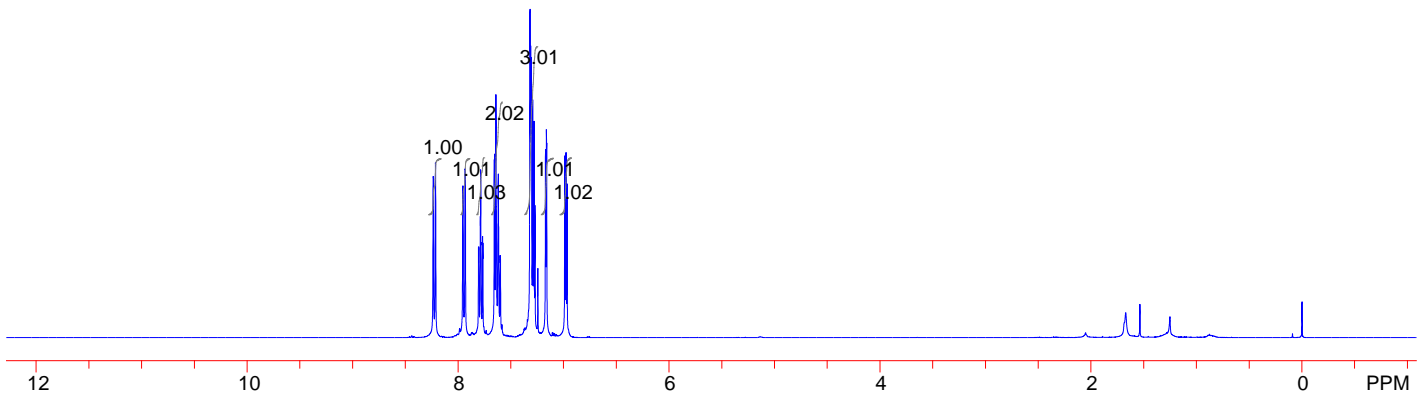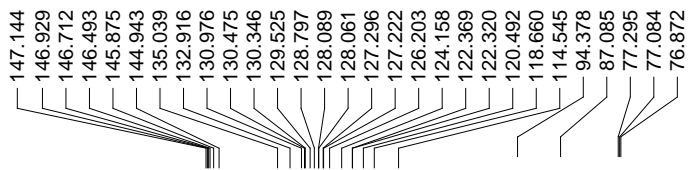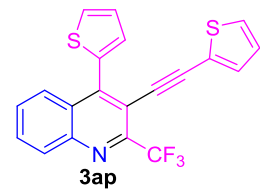

$^{13}\text{C}\{^1\text{H}\}$  (150 MHz,  $\text{CDCl}_3$ )

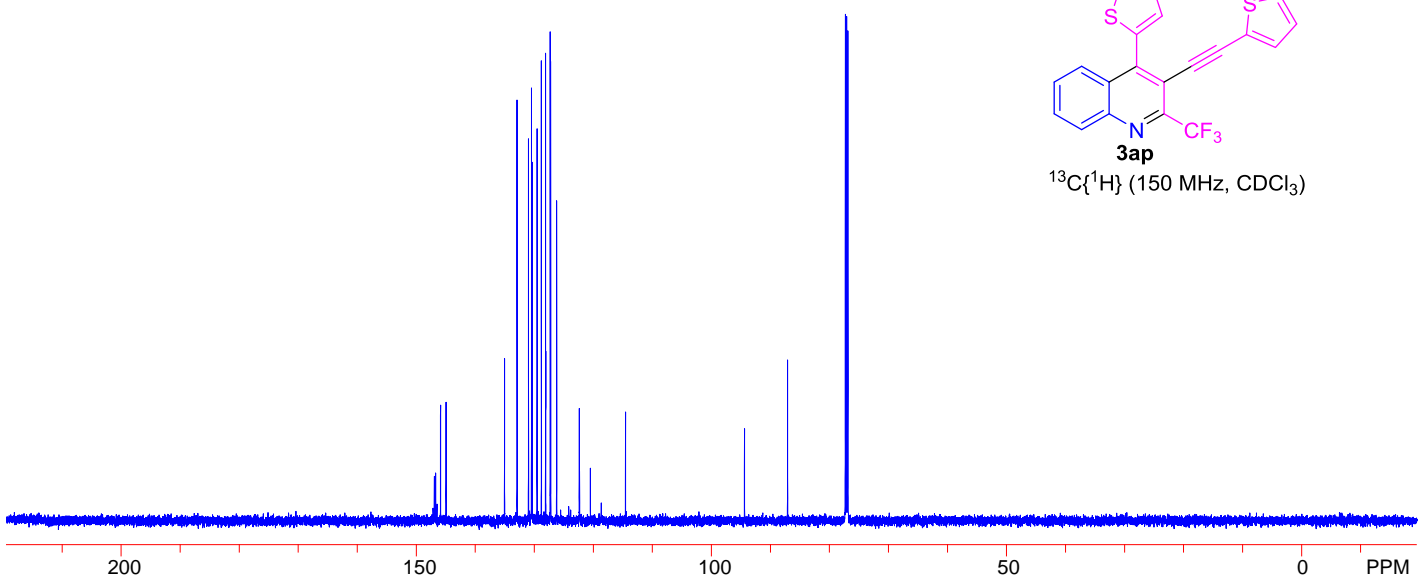

66.269

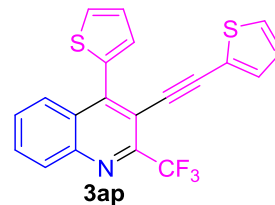

$^{19}\text{F}$  NMR (565 MHz,  $\text{CDCl}_3$ )

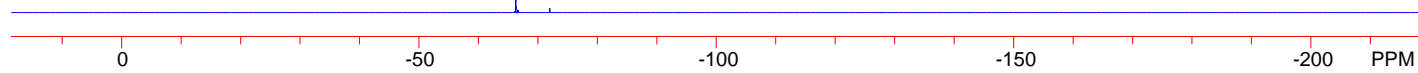

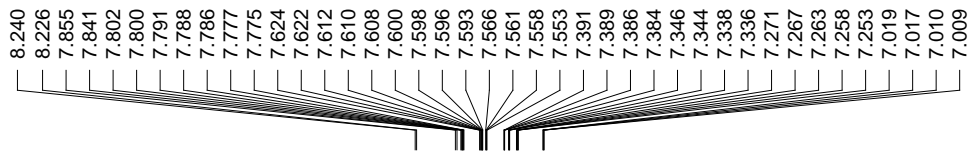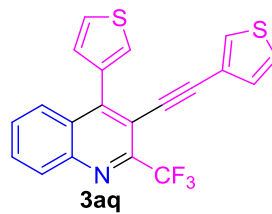

<sup>1</sup>H NMR (600 MHz, CDCl<sub>3</sub>)

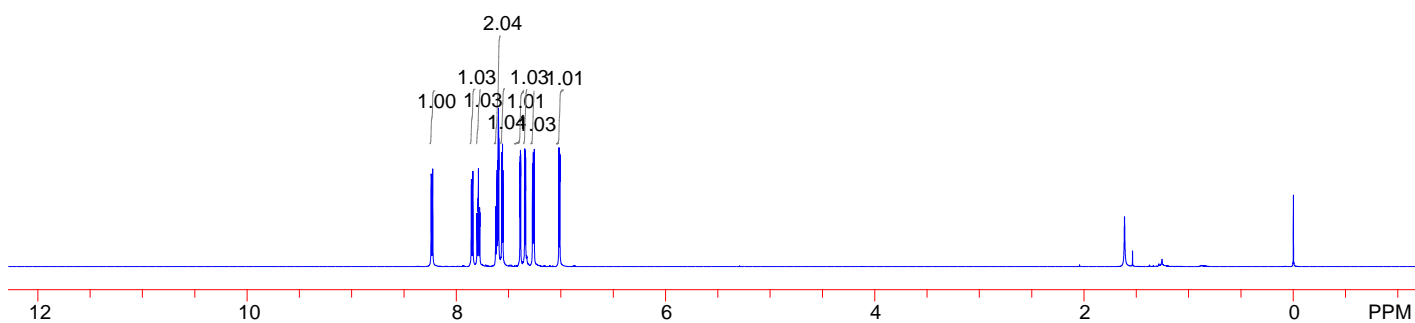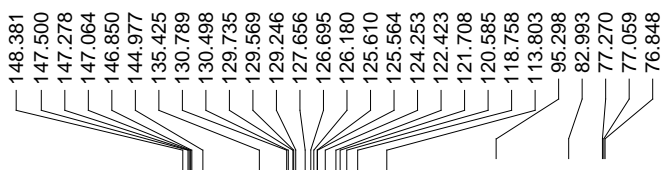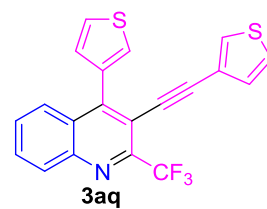

<sup>13</sup>C{<sup>1</sup>H} (150 MHz, CDCl<sub>3</sub>)

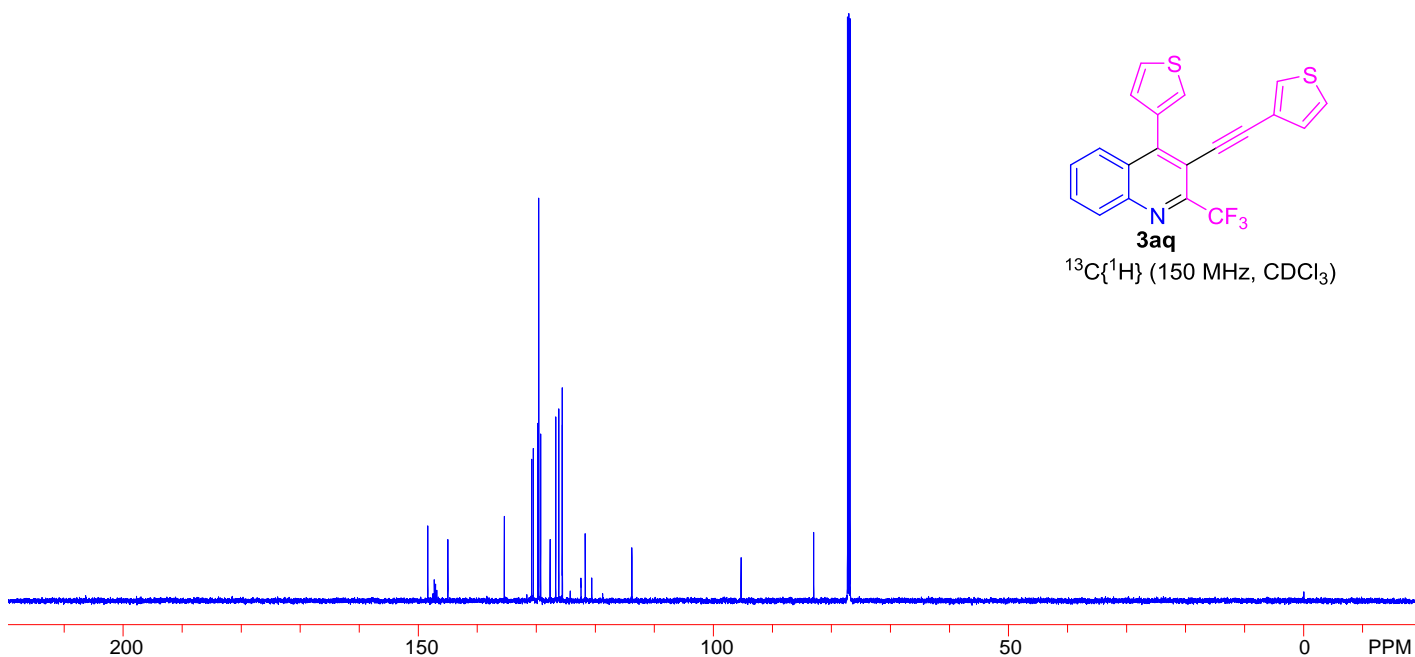

66.269

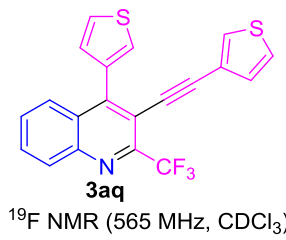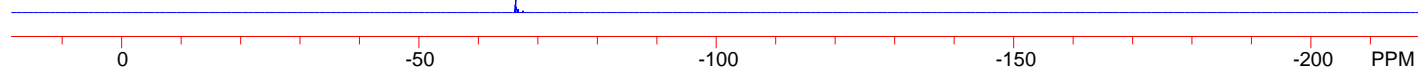

8.251  
8.230  
7.790  
7.786  
7.772  
7.769  
7.765  
7.748  
7.705  
7.684  
7.601  
7.587  
7.574  
7.568  
7.564  
7.554  
7.550  
7.546  
7.526  
7.511  
7.506  
7.492  
7.488  
7.327  
7.308  
7.305  
7.291  
7.275  
7.261  
7.252  
7.234  
7.230  
7.215  
7.210  
7.191  
7.055

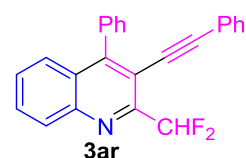

$^1\text{H NMR}$  (400 MHz,  $\text{CDCl}_3$ )

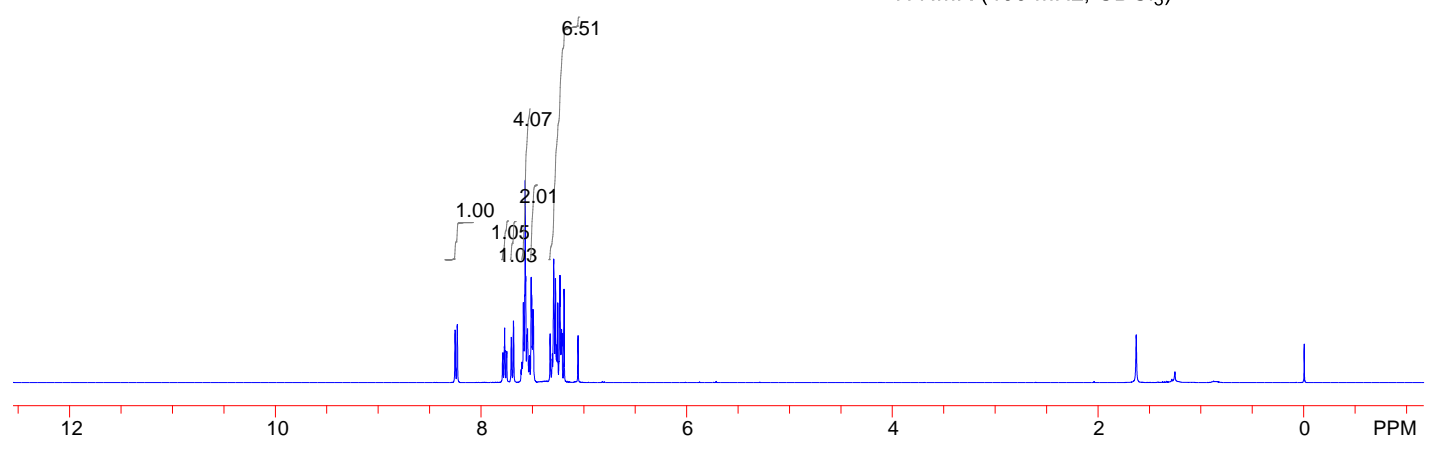

152.545  
151.397  
151.247  
151.089  
145.982  
135.879  
131.497  
130.545  
130.263  
130.016  
128.914  
128.762  
128.522  
128.361  
128.317  
127.253  
126.413  
122.491  
115.196  
114.237  
113.596  
111.991  
99.775  
83.527  
77.262  
77.051  
76.839

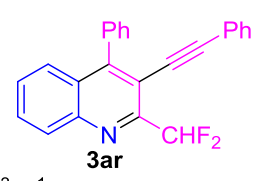

$^{13}\text{C}\{^1\text{H}\}$  (150 MHz,  $\text{CDCl}_3$ )

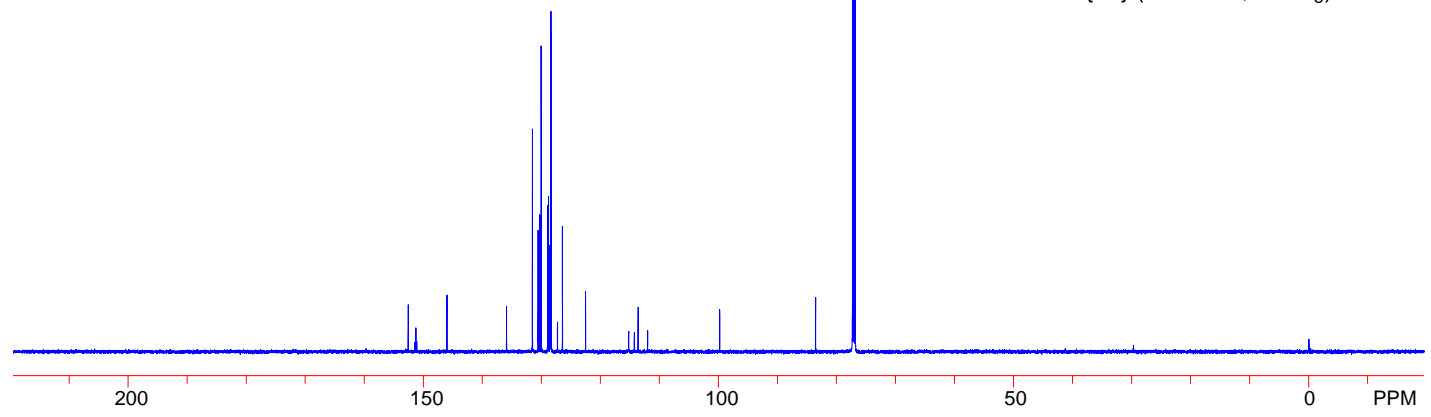

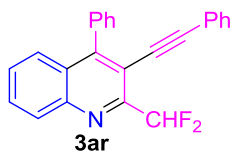

$^{19}\text{F}$  NMR (565 MHz,  $\text{CDCl}_3$ )

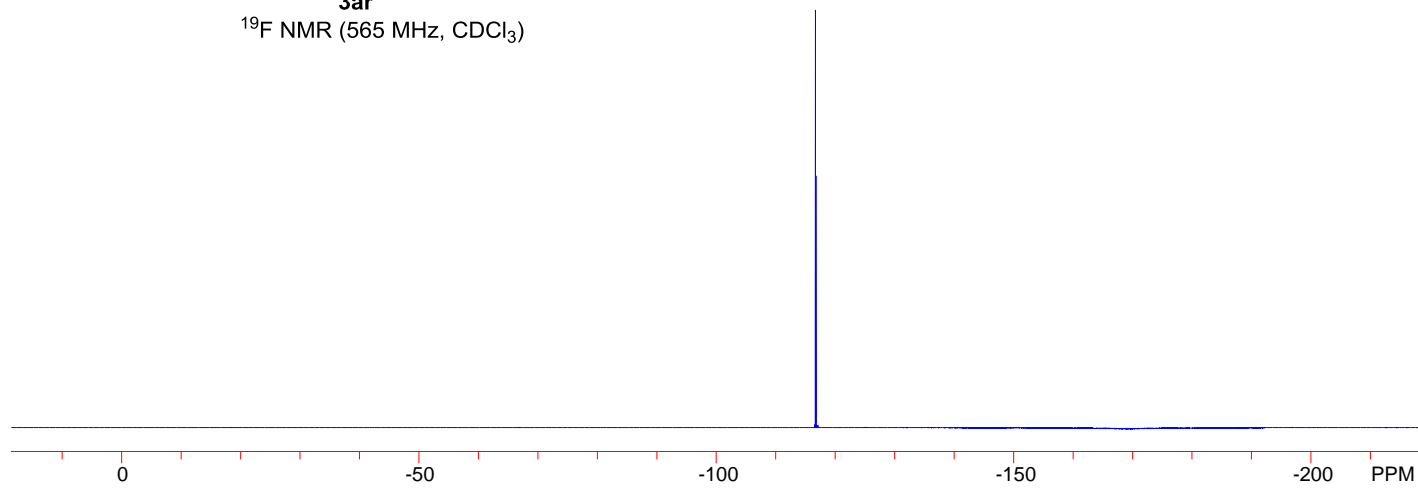

8.243  
8.229  
7.799  
7.797  
7.788  
7.785  
7.783  
7.774  
7.772  
7.670  
7.657  
7.608  
7.603  
7.593  
7.591  
7.581  
7.577  
7.570  
7.569  
7.567  
7.565  
7.489  
7.486  
7.483  
7.476  
7.474  
7.307  
7.302  
7.298  
7.292  
7.287  
7.283  
7.281  
7.278  
7.274  
7.264  
7.262  
7.253  
7.248  
7.168  
7.165  
7.158  
7.154  
7.152

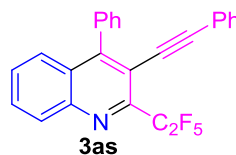

$^1\text{H NMR}$  (600 MHz,  $\text{CDCl}_3$ )

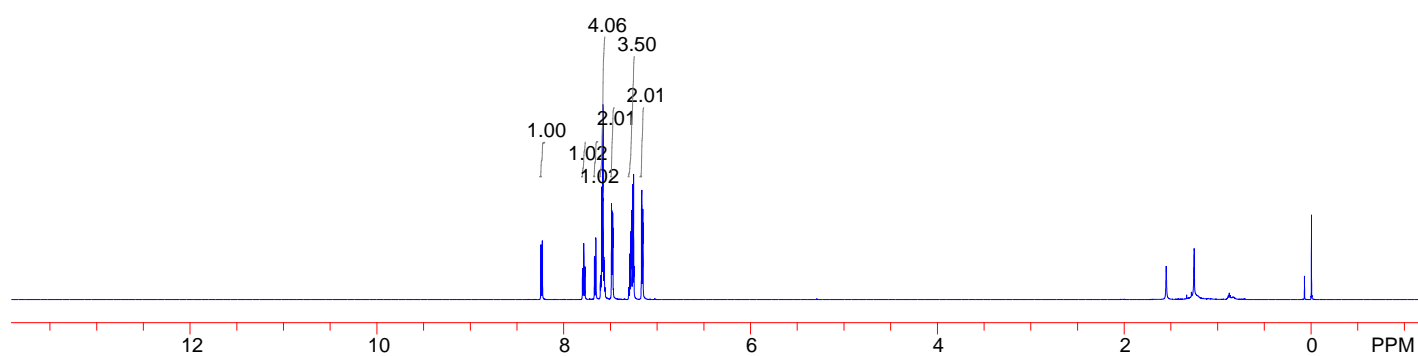

153.621  
146.992  
146.822  
146.665  
145.080  
135.938  
131.480  
130.713  
130.581  
129.967  
129.224  
128.846  
128.757  
128.327  
128.292  
127.193  
126.355  
122.636  
120.573  
120.330  
120.087  
118.668  
118.426  
118.189  
114.561  
114.226  
113.988  
112.518  
112.282  
110.821  
110.574  
100.114  
83.538  
77.248  
77.036  
76.825

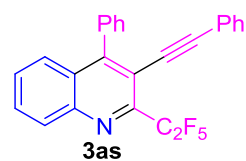

$^{13}\text{C}\{^1\text{H}\}$  (150 MHz,  $\text{CDCl}_3$ )

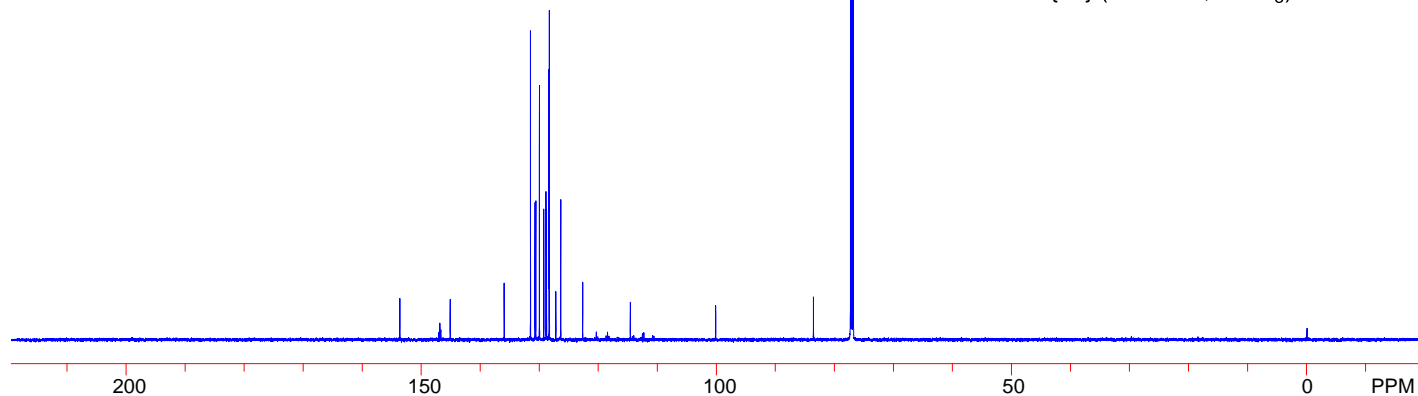

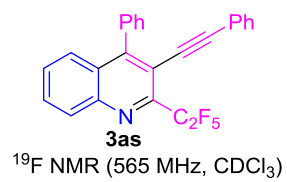

-80.804

-110.882

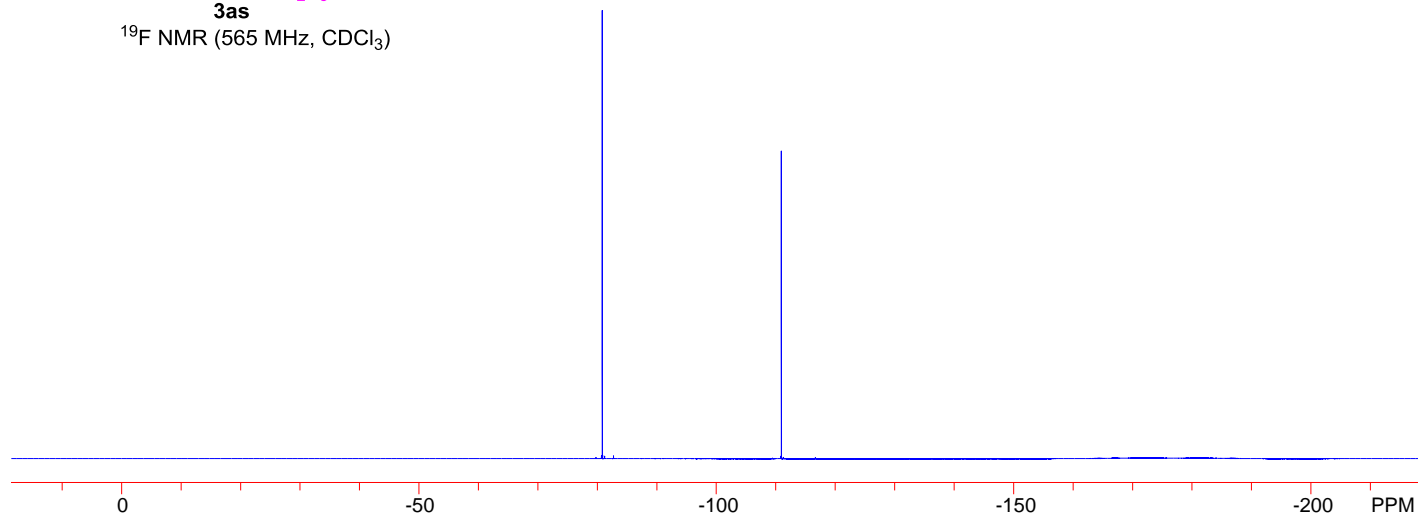



## V. NMR spectra of 4a-4l

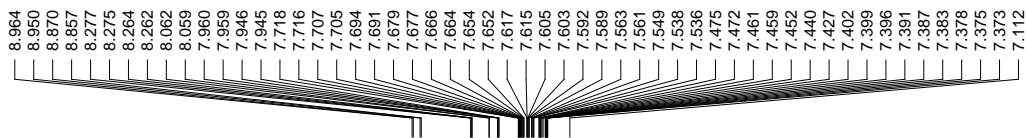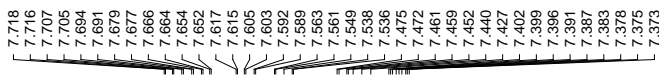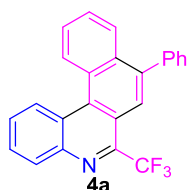

$^1\text{H}$  NMR (600 MHz,  $\text{CDCl}_3$ )

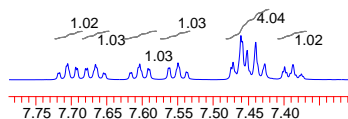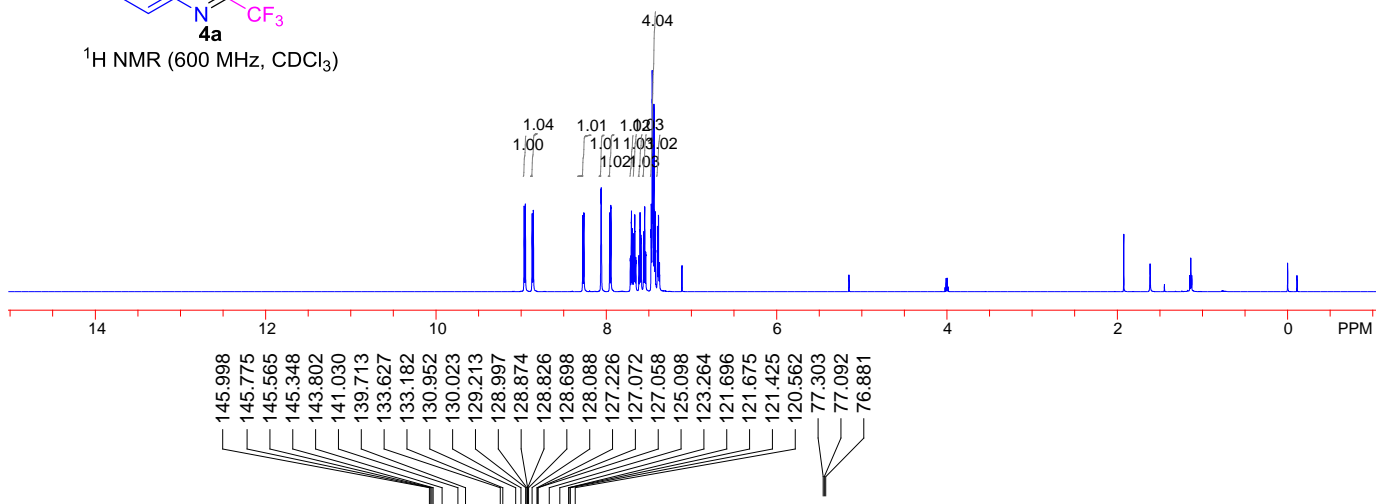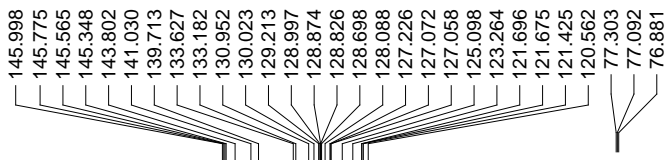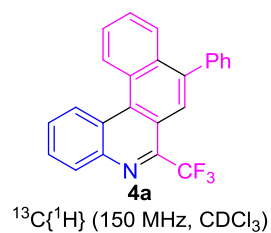

$^{13}\text{C}\{^1\text{H}\}$  (150 MHz,  $\text{CDCl}_3$ )

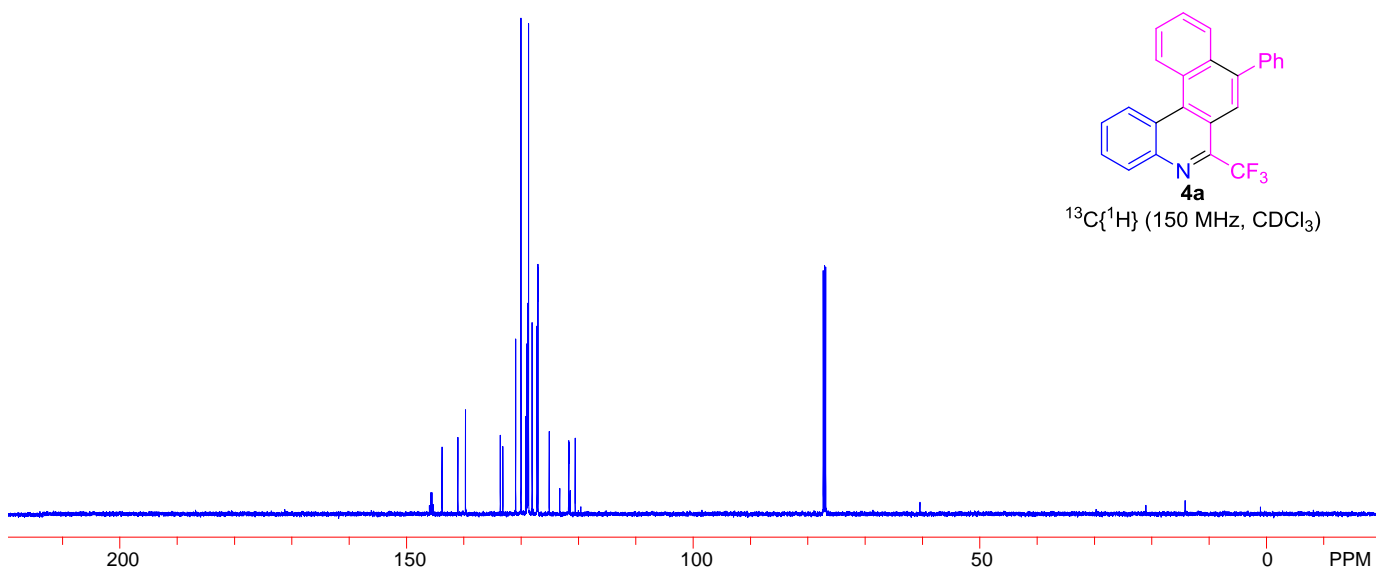

62.364

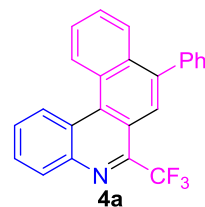

$^{19}\text{F}$  NMR (565 MHz,  $\text{CDCl}_3$ )

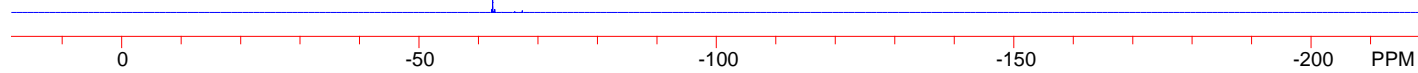

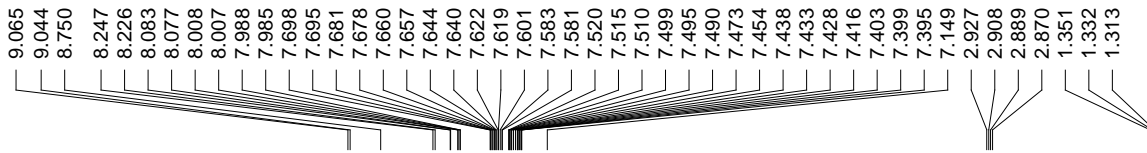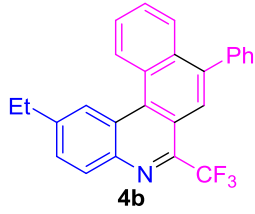

$^1\text{H NMR}$  (400 MHz,  $\text{CDCl}_3$ )

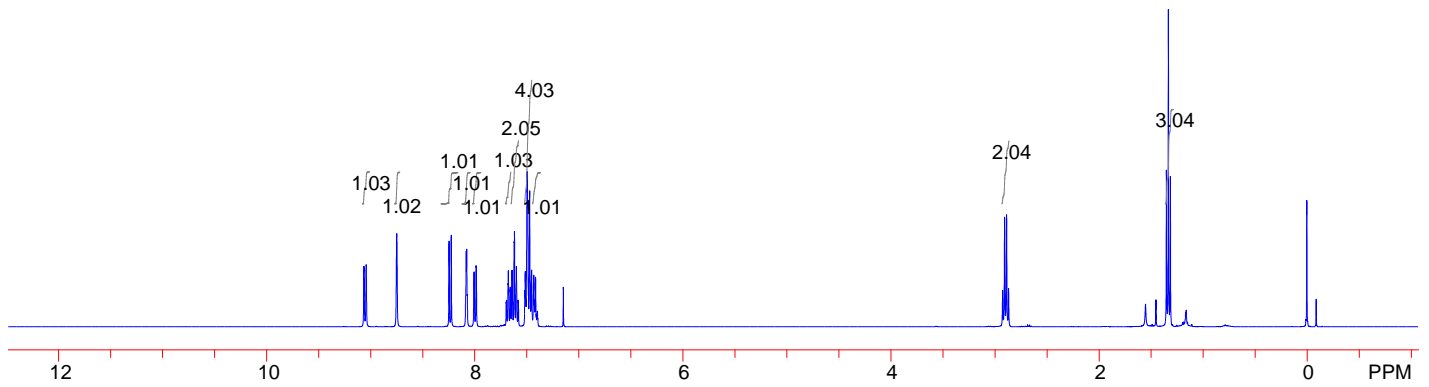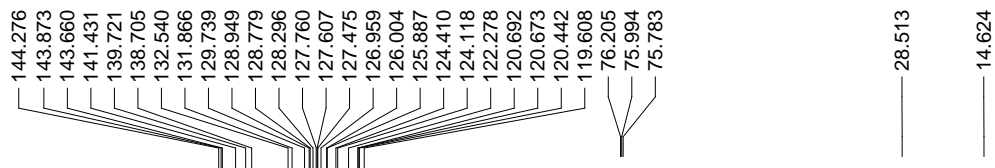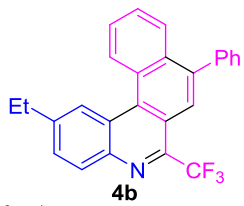

$^{13}\text{C}\{^1\text{H}\}$  (150 MHz,  $\text{CDCl}_3$ )

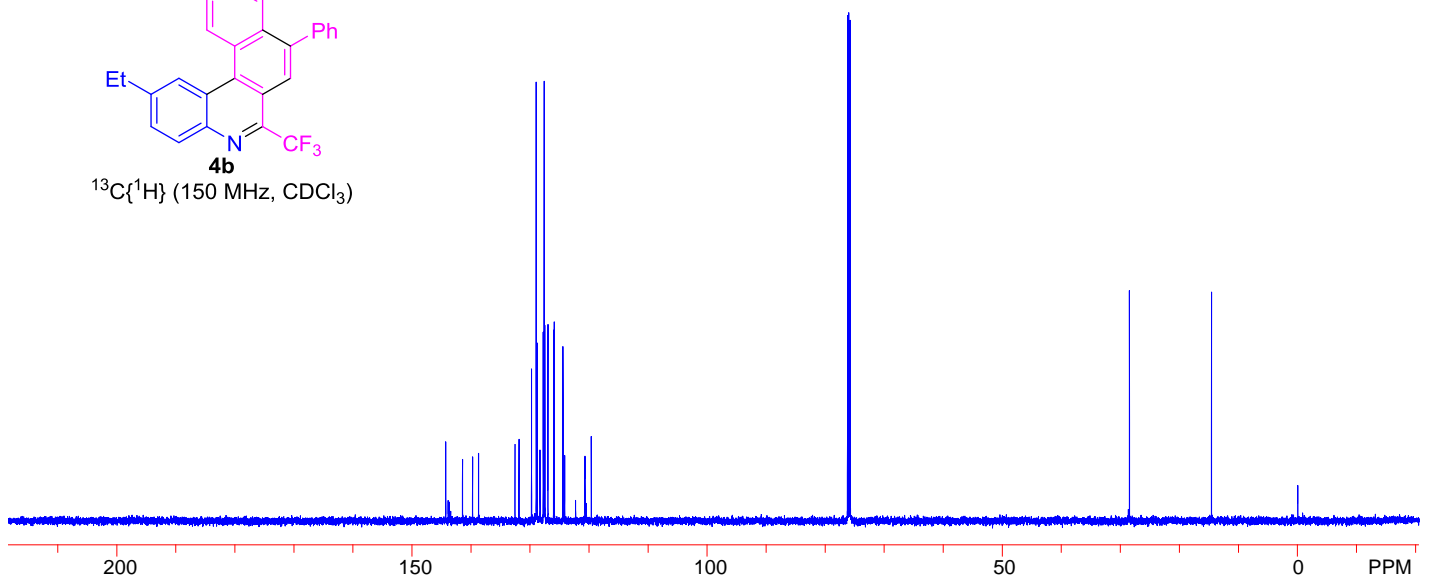

62.304  
62.311

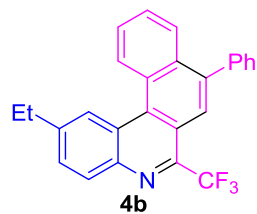

$^{19}\text{F}$  NMR (376 MHz,  $\text{CDCl}_3$ )

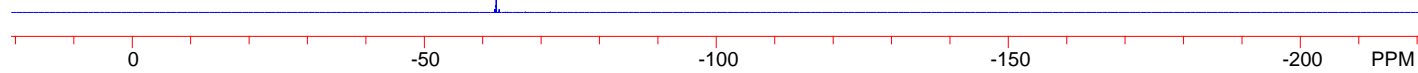

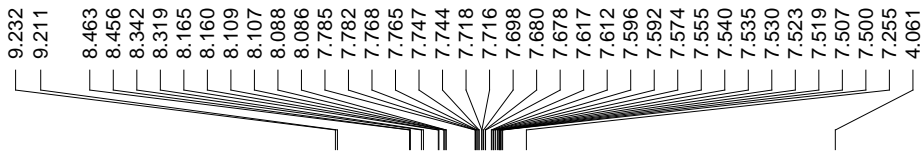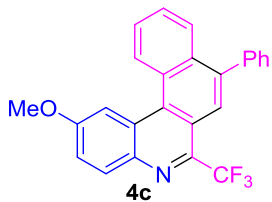

$^1\text{H}$  NMR (400 MHz,  $\text{CDCl}_3$ )

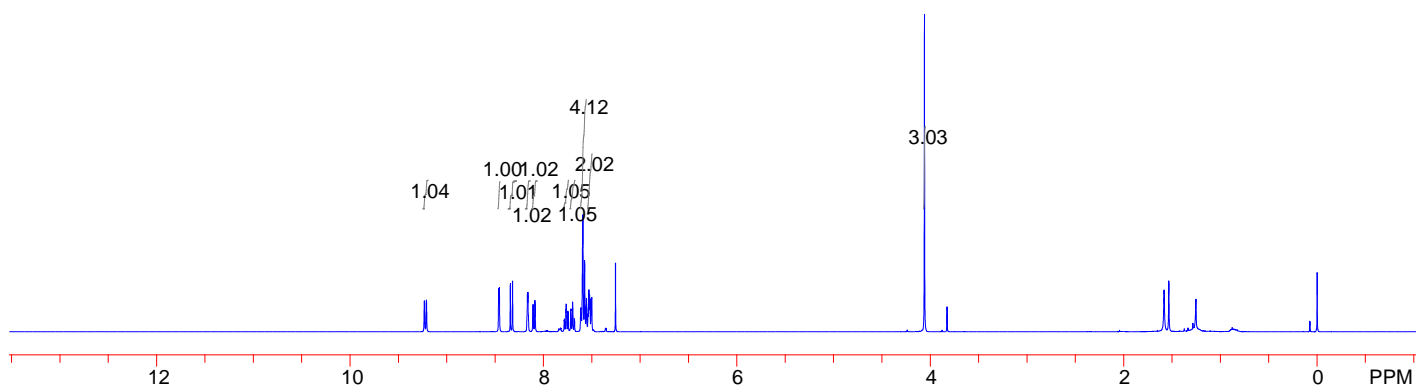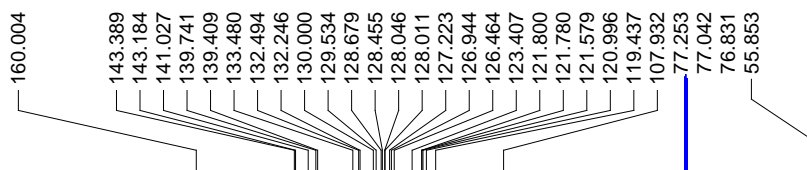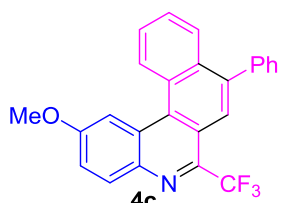

$^{13}\text{C}\{^1\text{H}\}$  (150 MHz,  $\text{CDCl}_3$ )

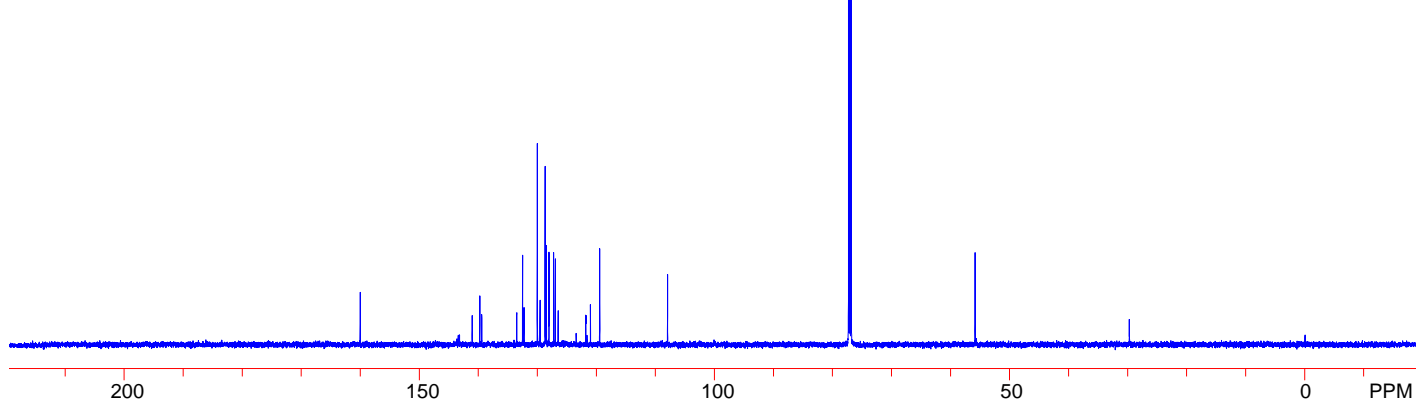

62.204  
62.211

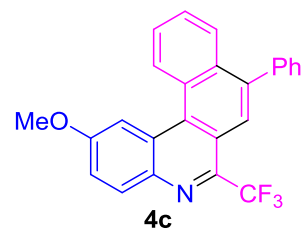

<sup>19</sup>F NMR (376 MHz, CDCl<sub>3</sub>)

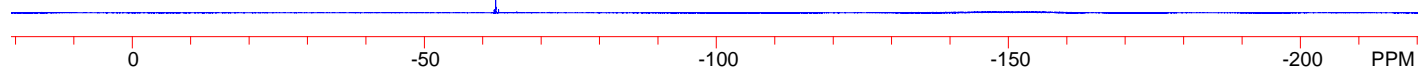

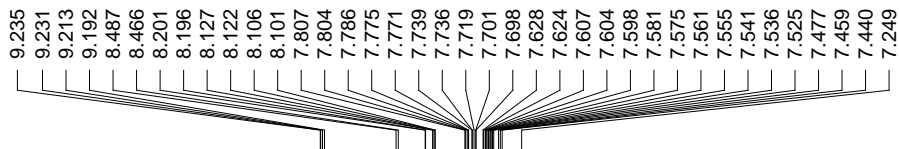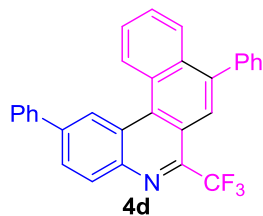

$^1\text{H}$  NMR (400 MHz,  $\text{CDCl}_3$ )

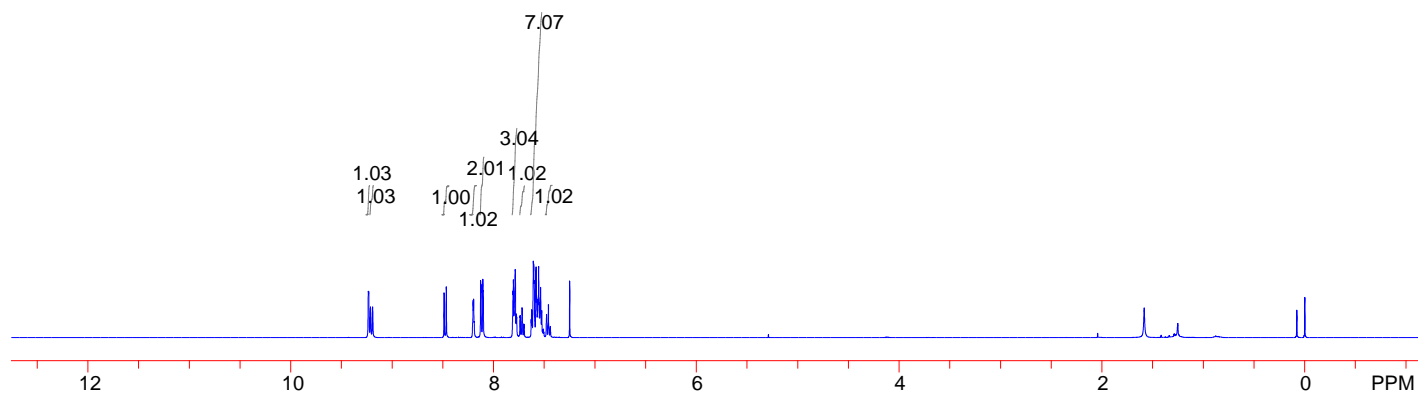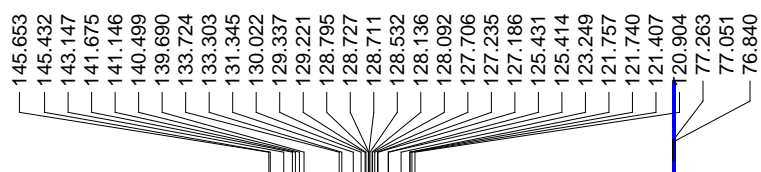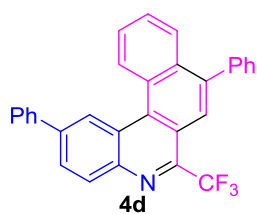

$^{13}\text{C}\{^1\text{H}\}$  (150 MHz,  $\text{CDCl}_3$ )

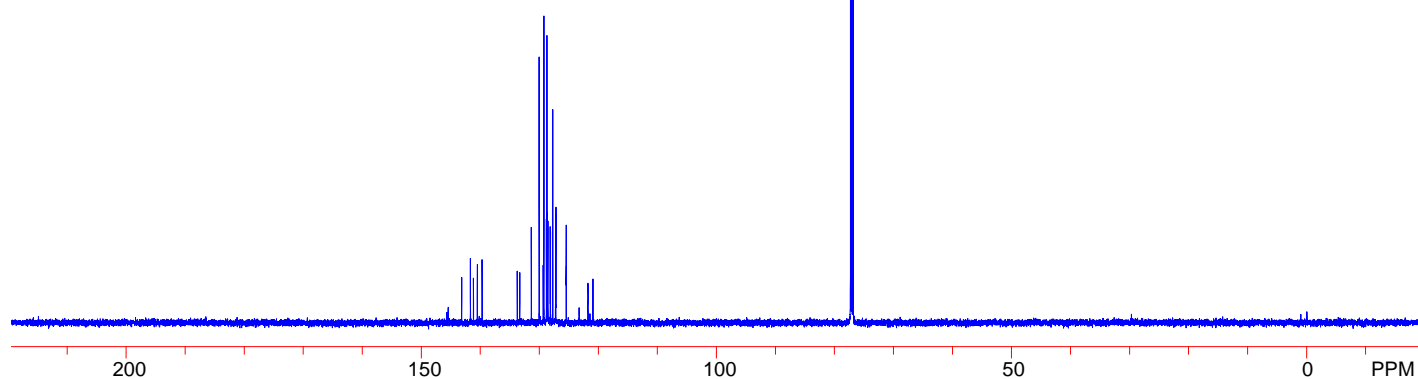

62.392  
62.399

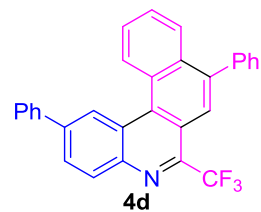

$^{19}\text{F}$  NMR (376 MHz,  $\text{CDCl}_3$ )

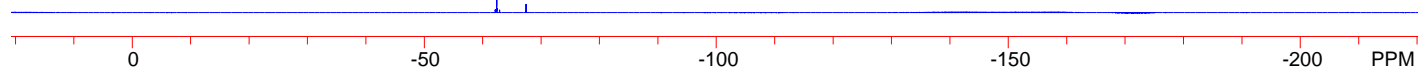



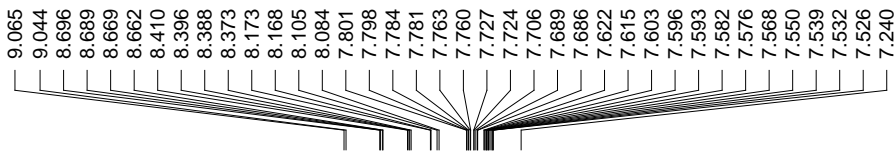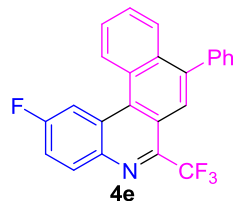

$^1\text{H}$  NMR (400 MHz,  $\text{CDCl}_3$ )

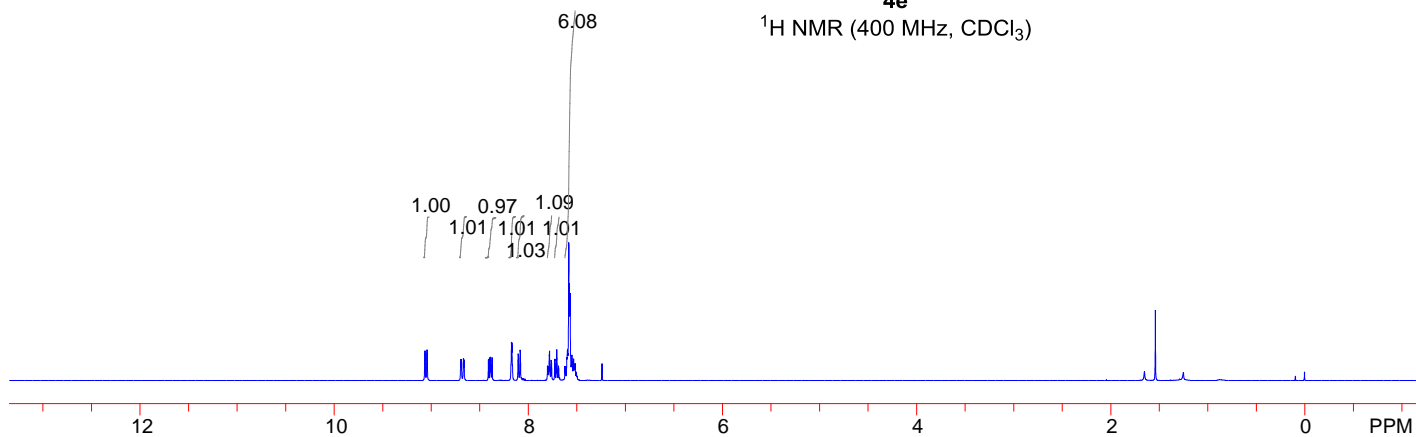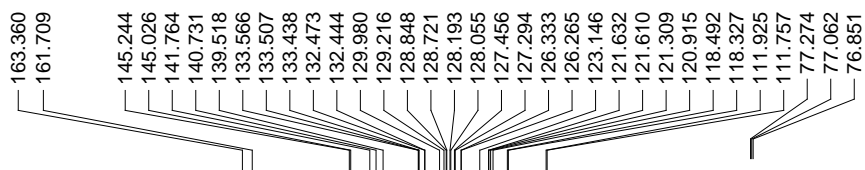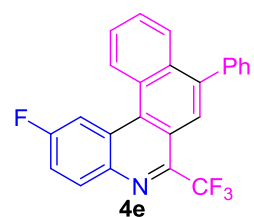

$^{13}\text{C}\{^1\text{H}\}$  (150 MHz,  $\text{CDCl}_3$ )

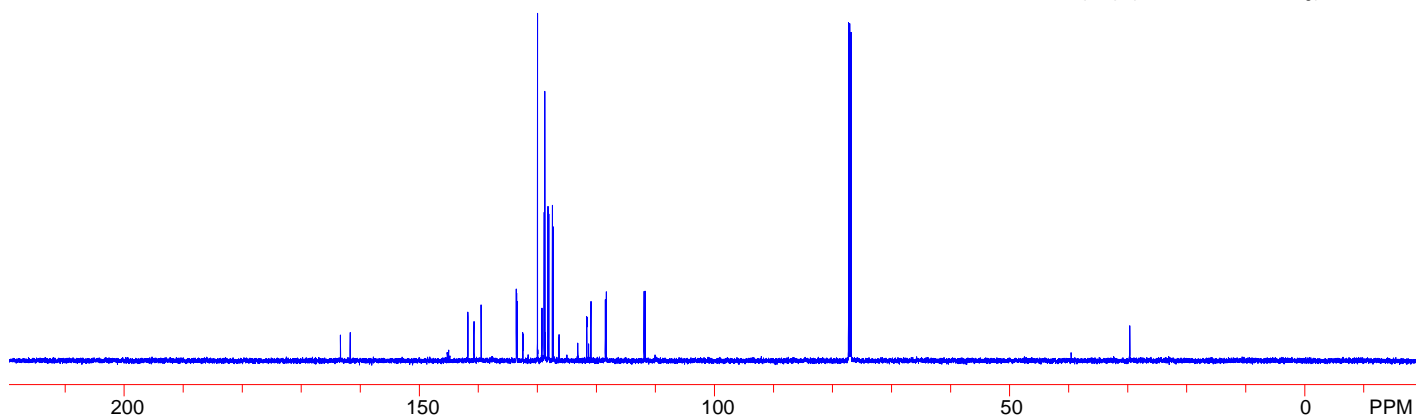

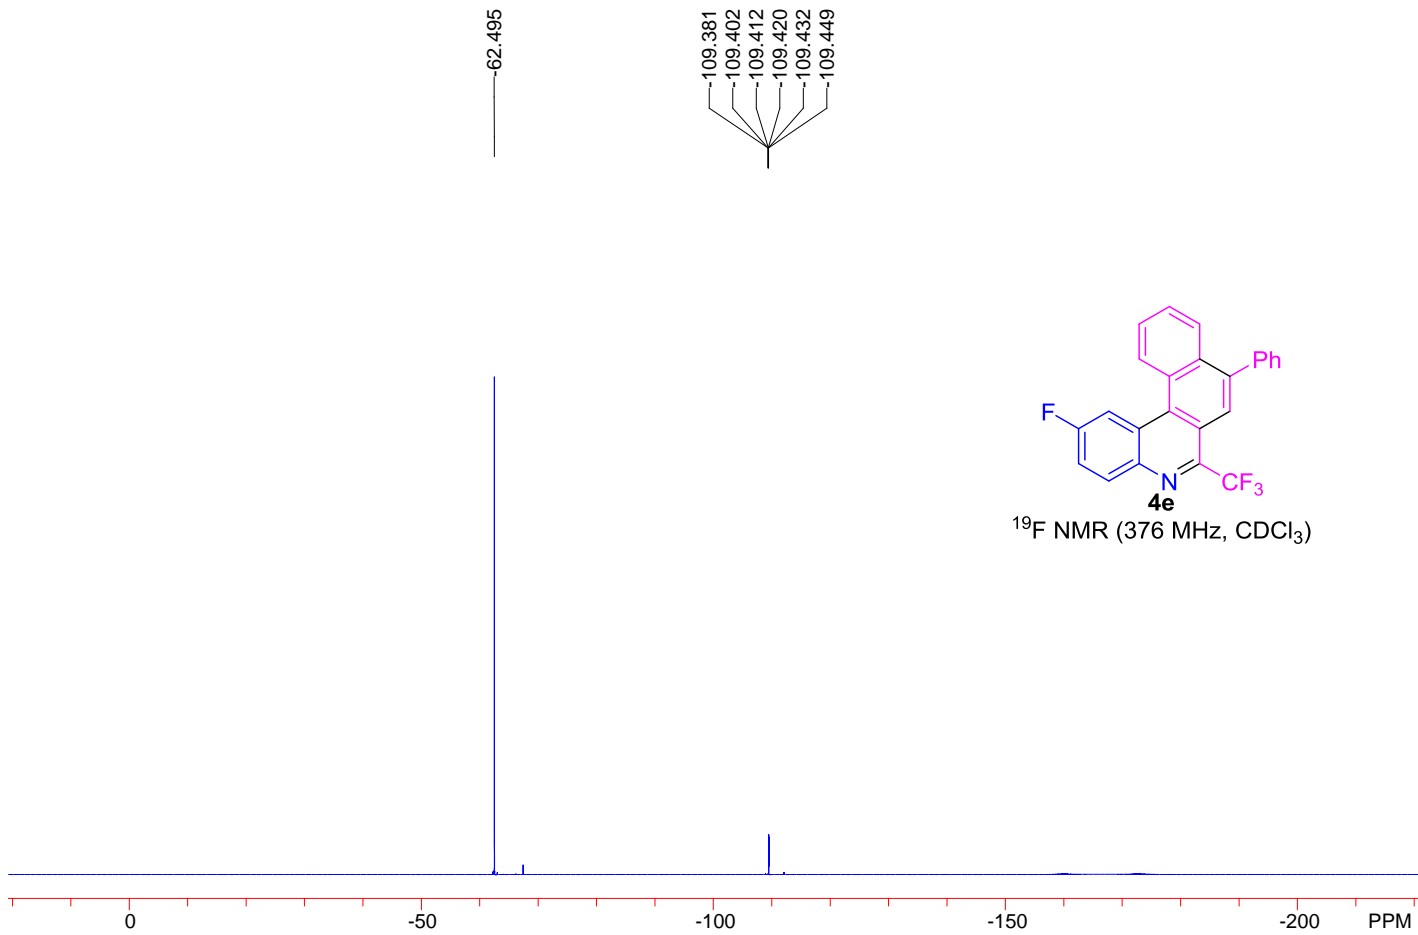

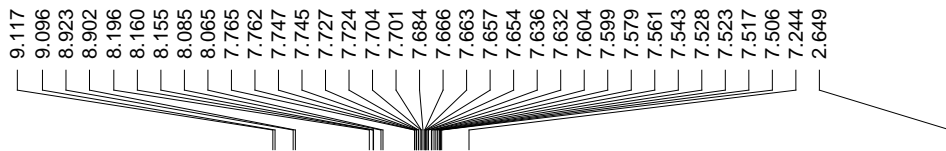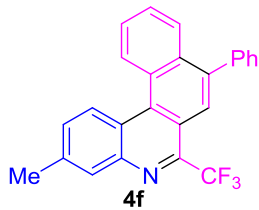

$^1\text{H}$  NMR (400 MHz,  $\text{CDCl}_3$ )

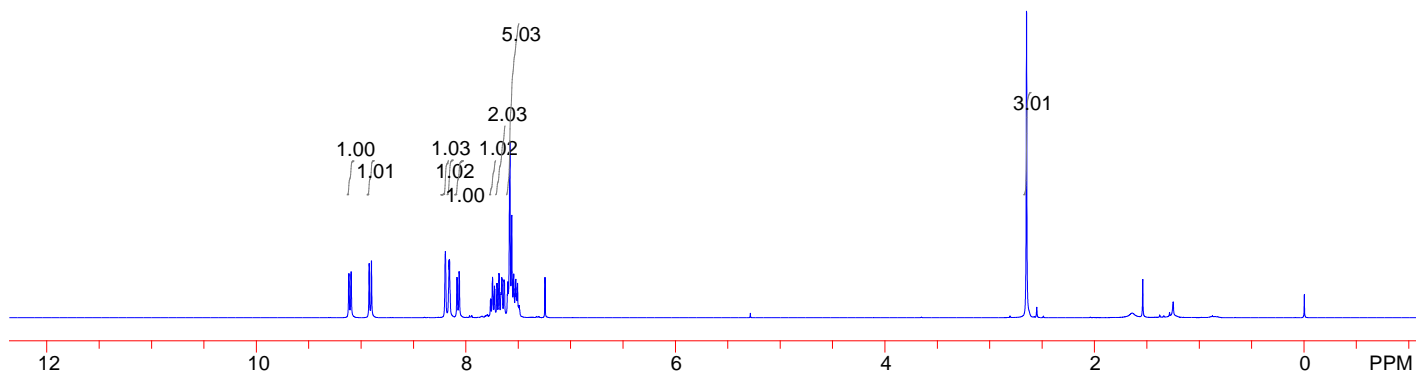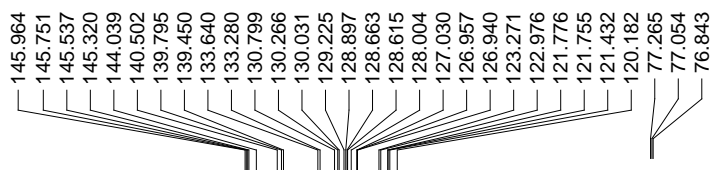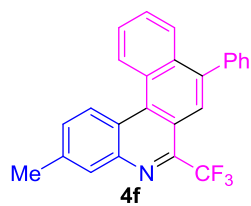

$^{13}\text{C}\{^1\text{H}\}$  (150 MHz,  $\text{CDCl}_3$ )

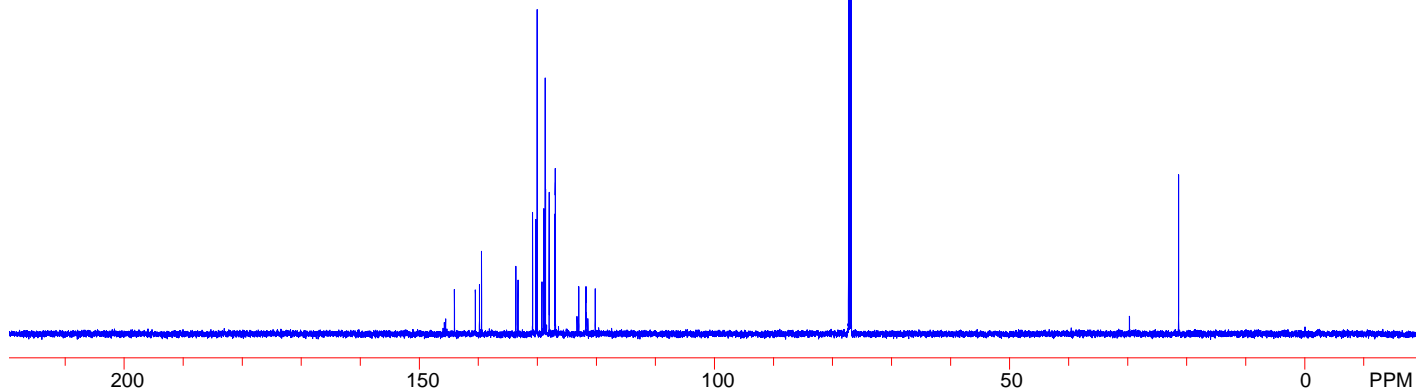

62.418

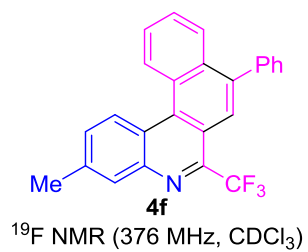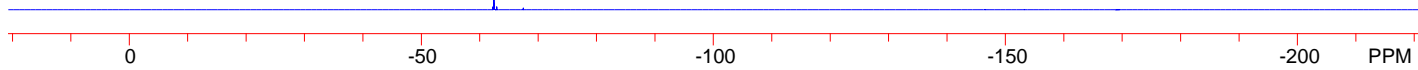

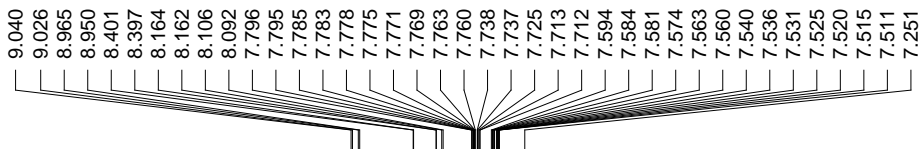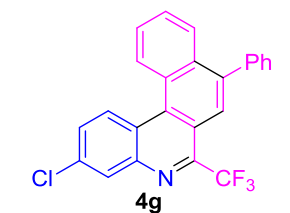

$^1\text{H NMR}$  (600 MHz,  $\text{CDCl}_3$ )

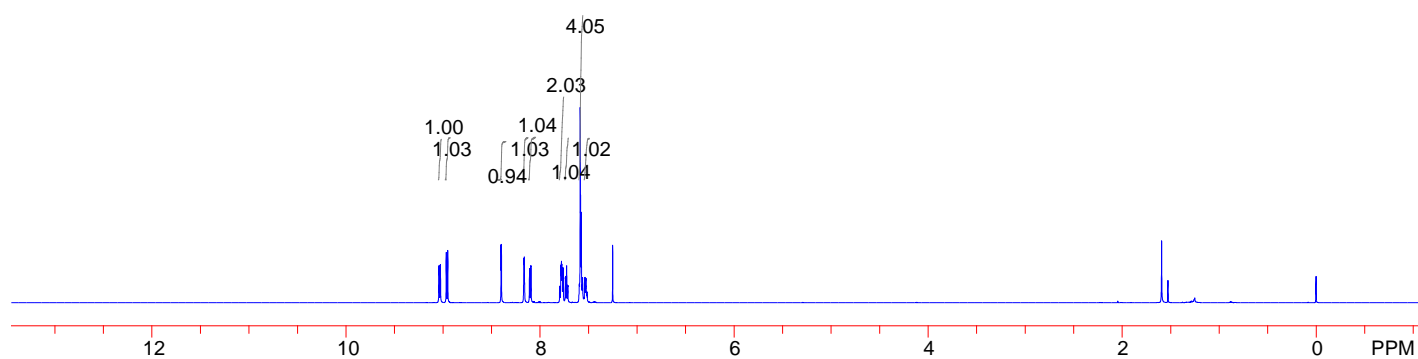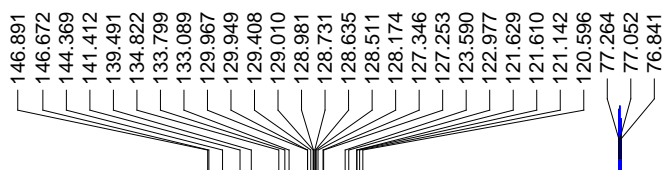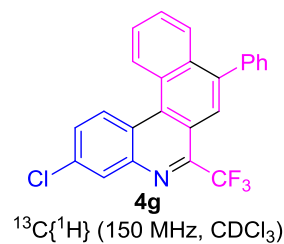

$^{13}\text{C}\{^1\text{H}\}$  (150 MHz,  $\text{CDCl}_3$ )

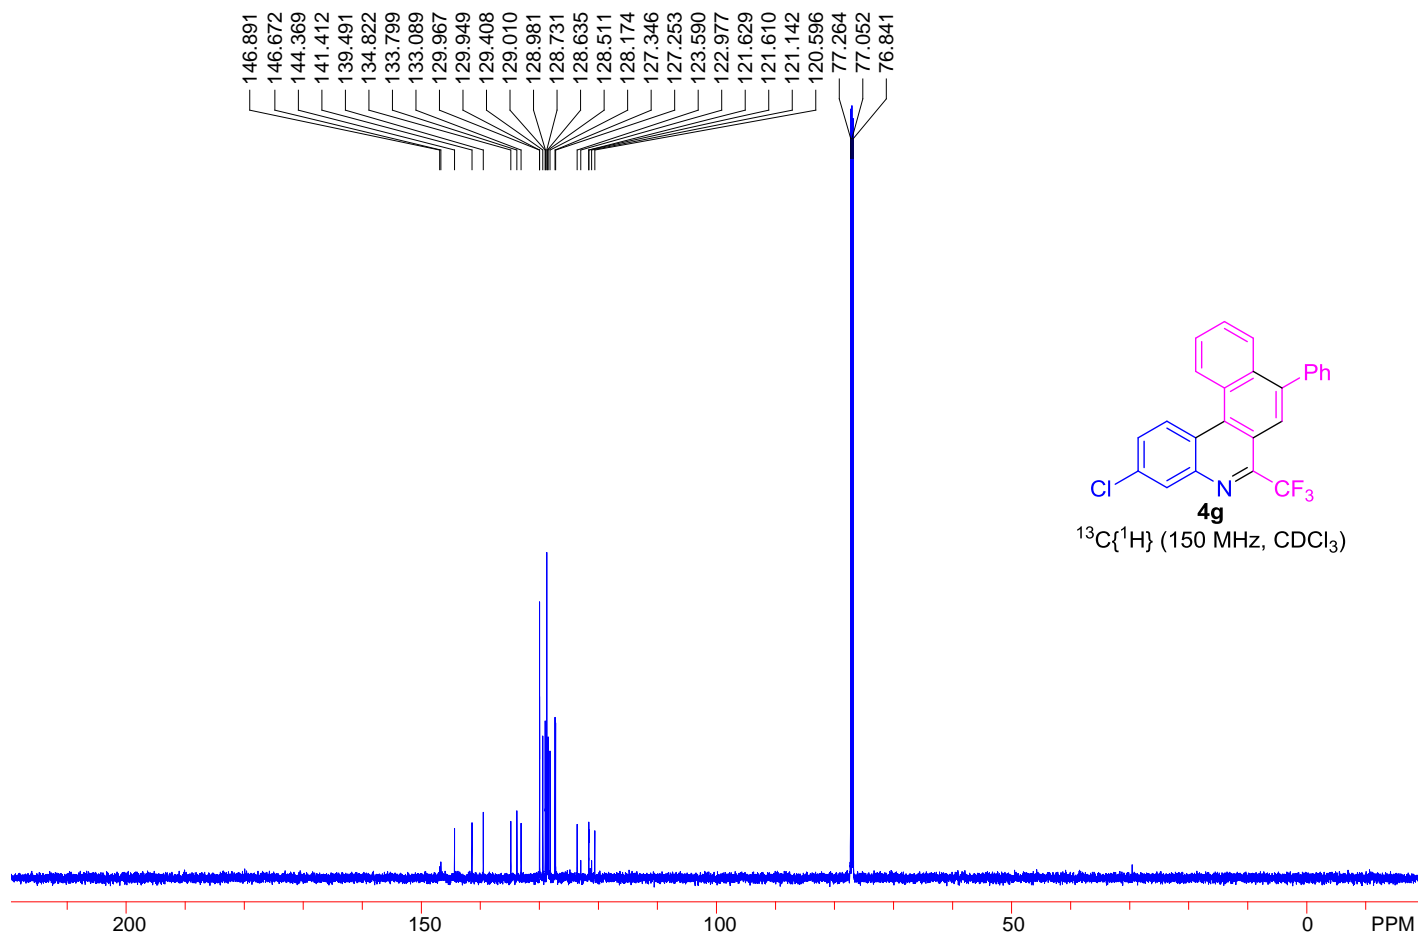

62.632

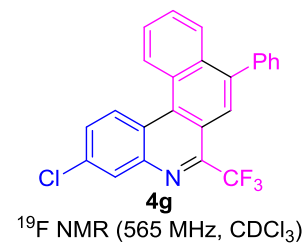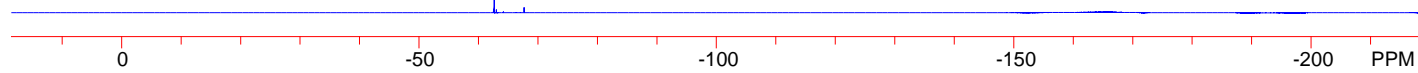

9.497  
9.288  
9.267  
8.919  
8.186  
8.181  
8.175  
8.165  
8.155  
8.149  
8.132  
8.111  
7.825  
7.822  
7.805  
7.787  
7.784  
7.730  
7.728  
7.710  
7.692  
7.658  
7.650  
7.642  
7.634  
7.626  
7.619  
7.614  
7.603  
7.599  
7.577  
7.558  
7.542  
7.538  
7.533  
7.528  
7.520  
7.243

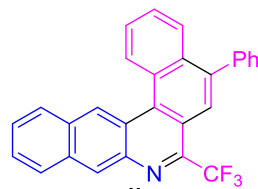

$^1\text{H NMR}$  (400 MHz,  $\text{CDCl}_3$ )

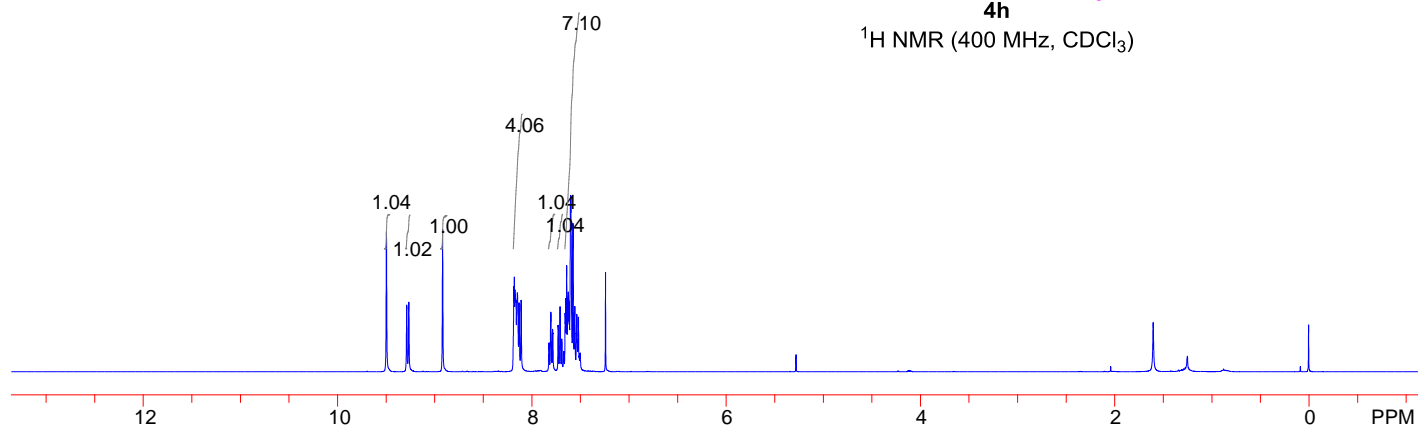

146.861  
146.653  
140.902  
140.821  
139.769  
133.774  
133.019  
132.912  
132.763  
130.068  
129.590  
129.293  
128.704  
128.582  
128.560  
128.521  
128.470  
128.055  
127.344  
127.127  
127.112  
126.974  
123.042  
122.095  
122.072  
121.204  
119.772  
77.267  
77.056  
76.845

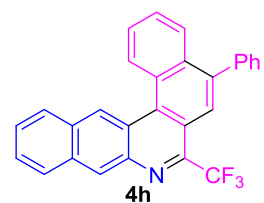

$^{13}\text{C}\{^1\text{H}\}$  (150 MHz,  $\text{CDCl}_3$ )

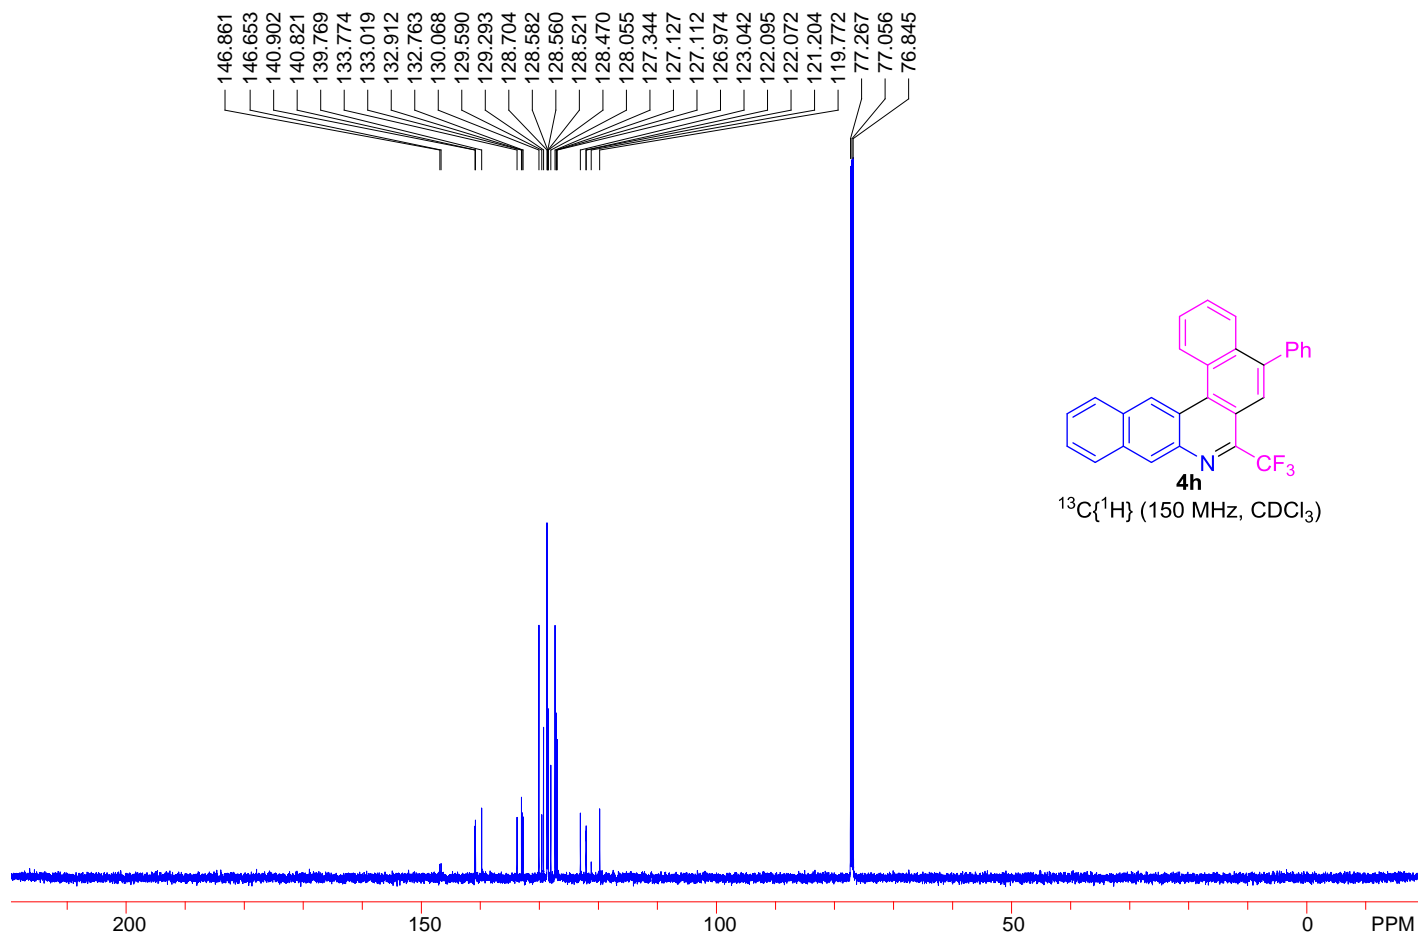

-62.971

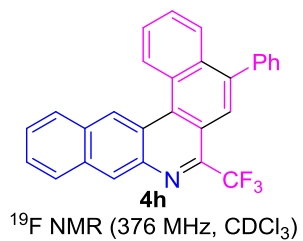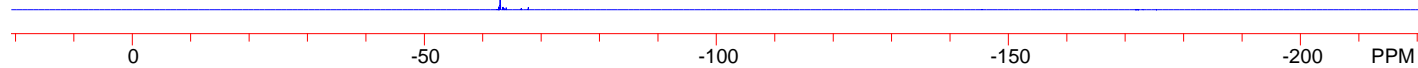



9.062  
9.047  
8.931  
8.917  
8.418  
8.416  
8.405  
8.403  
8.168  
8.166  
7.987  
7.983  
7.898  
7.897  
7.887  
7.885  
7.874  
7.872  
7.863  
7.860  
7.849  
7.837  
7.835  
7.726  
7.722  
7.711  
7.707  
7.579  
7.565  
7.517  
7.504  
7.254

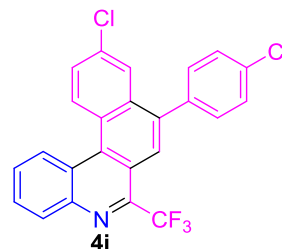

$^1\text{H NMR}$  (600 MHz,  $\text{CDCl}_3$ )

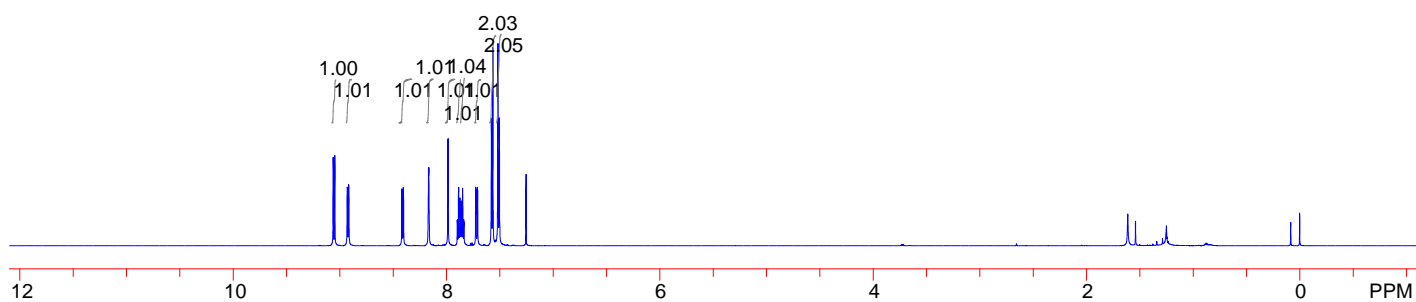

145.689  
145.468  
143.966  
138.819  
137.362  
135.254  
134.637  
134.502  
133.139  
131.195  
131.159  
130.547  
129.467  
129.200  
127.827  
127.594  
126.953  
125.839  
124.708  
123.050  
123.007  
122.987  
121.213  
120.369  
77.259  
77.047  
76.836

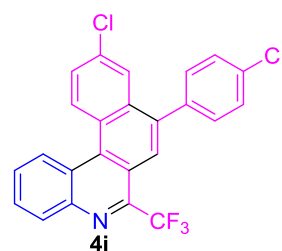

$^{13}\text{C}\{^1\text{H}\}$  (150 MHz,  $\text{CDCl}_3$ )

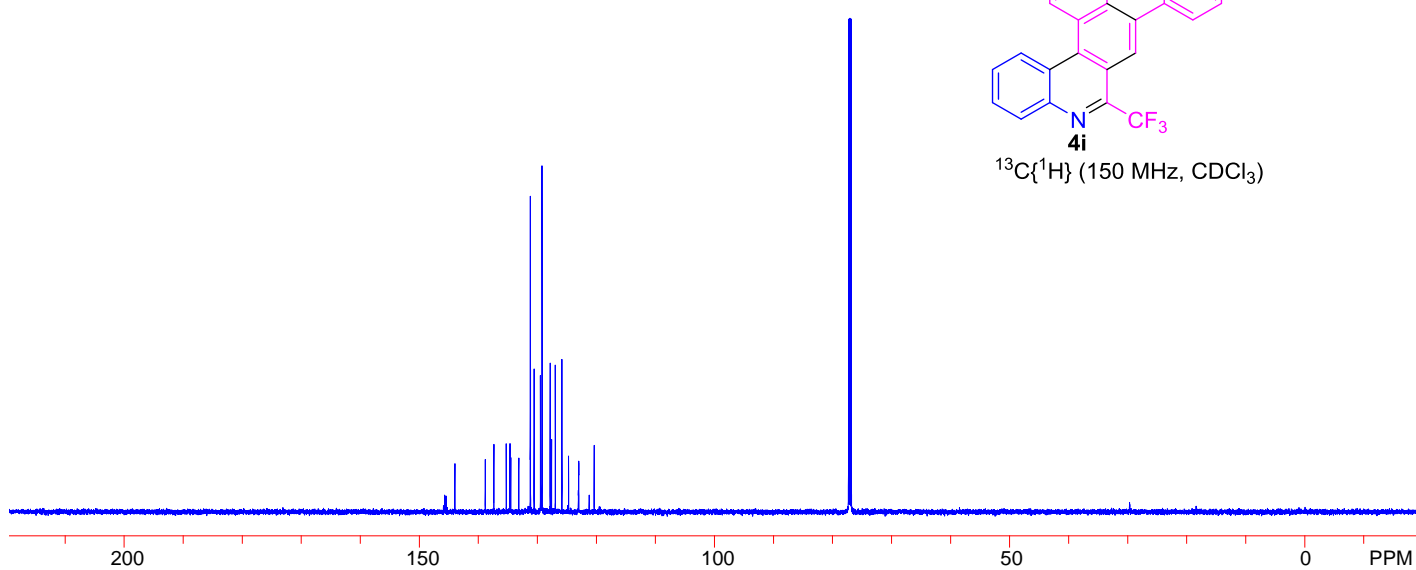

62.430

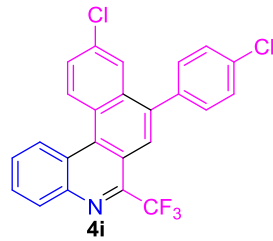

<sup>19</sup>F NMR (565 MHz, CDCl<sub>3</sub>)

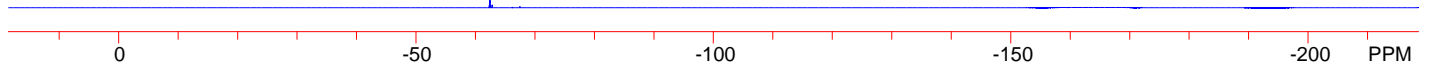

8.978  
8.955  
8.919  
8.899  
8.816  
8.413  
8.396  
8.394  
8.151  
8.147  
7.901  
7.898  
7.884  
7.859  
7.837  
7.831  
7.824  
7.736  
7.715  
7.456  
7.435  
7.252

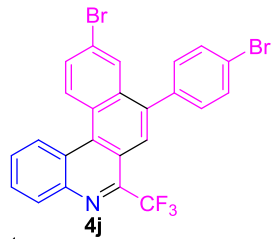

$^1\text{H NMR}$  (400 MHz,  $\text{CDCl}_3$ )

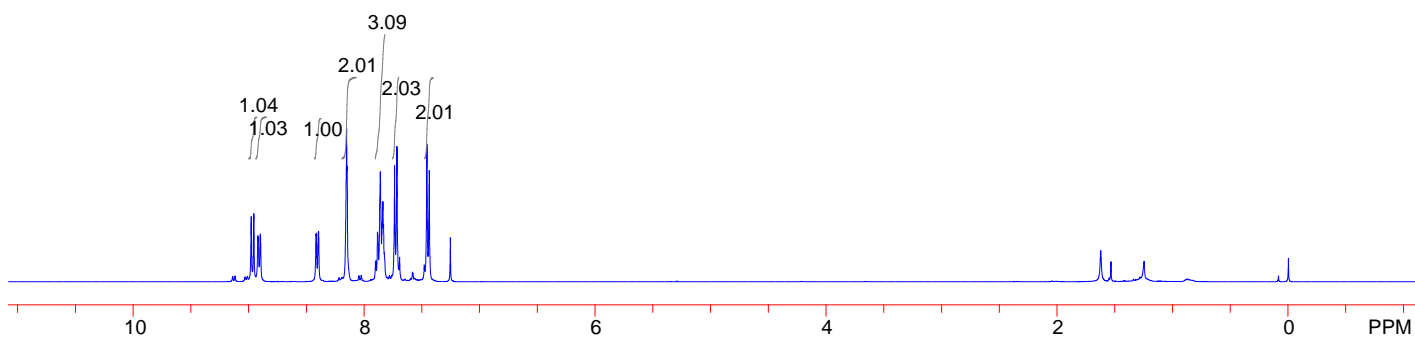

145.902  
145.683  
145.462  
145.243  
143.967  
138.728  
137.817  
134.651  
133.189  
132.173  
131.503  
131.166  
130.556  
130.506  
129.491  
129.227  
129.003  
127.872  
126.939  
124.645  
123.715  
123.038  
122.962  
122.941  
122.812  
121.196  
120.377  
77.274  
77.062  
76.851

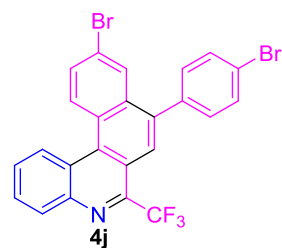

$^{13}\text{C}\{^1\text{H}\}$  (150 MHz,  $\text{CDCl}_3$ )

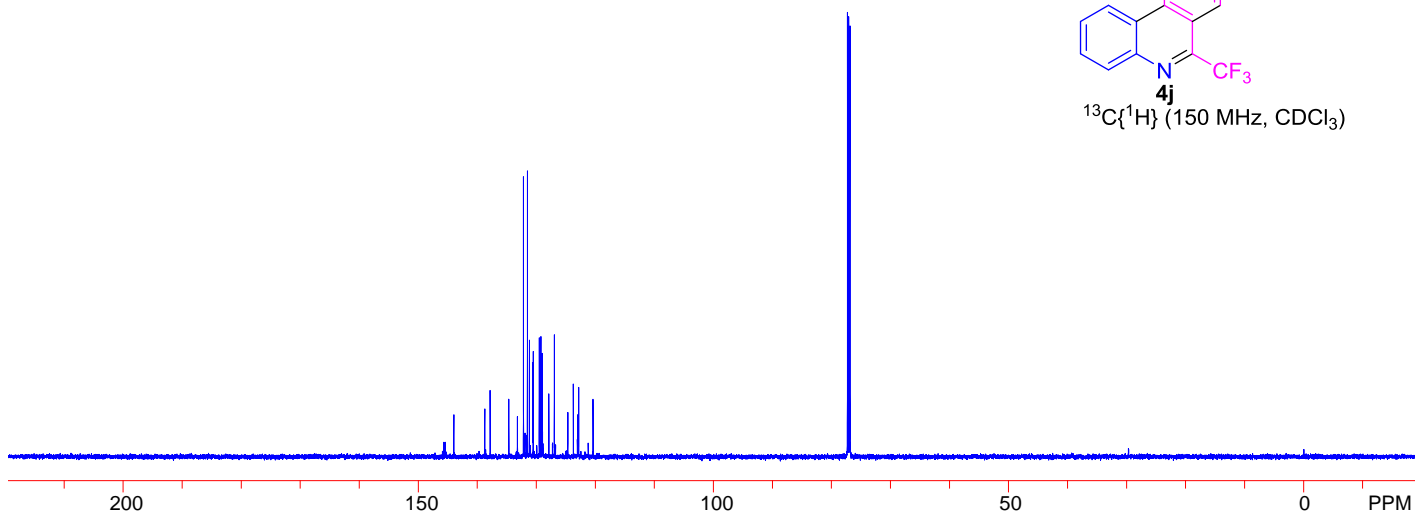

62.415

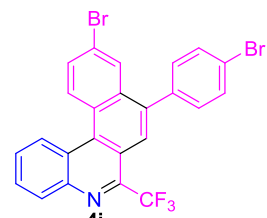

<sup>19</sup>F NMR (376 MHz, CDCl<sub>3</sub>)

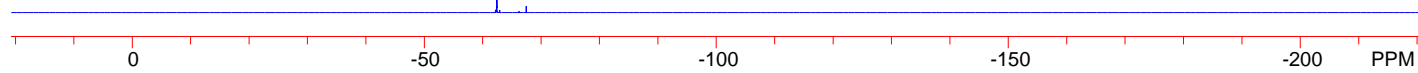

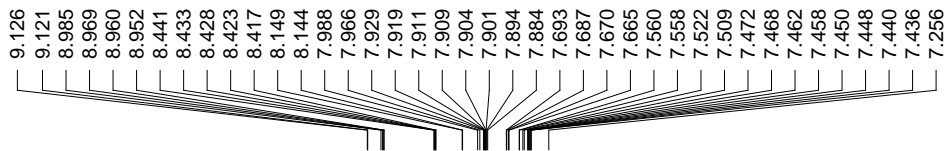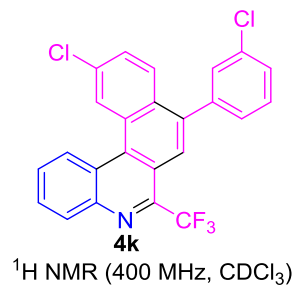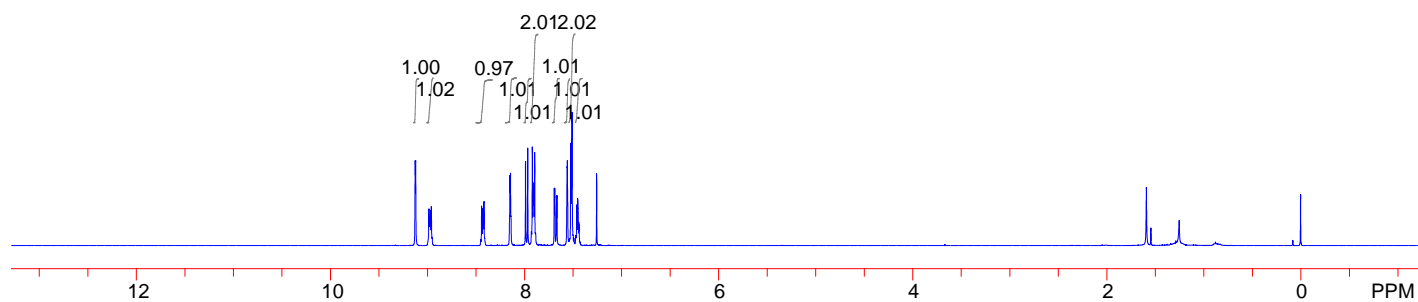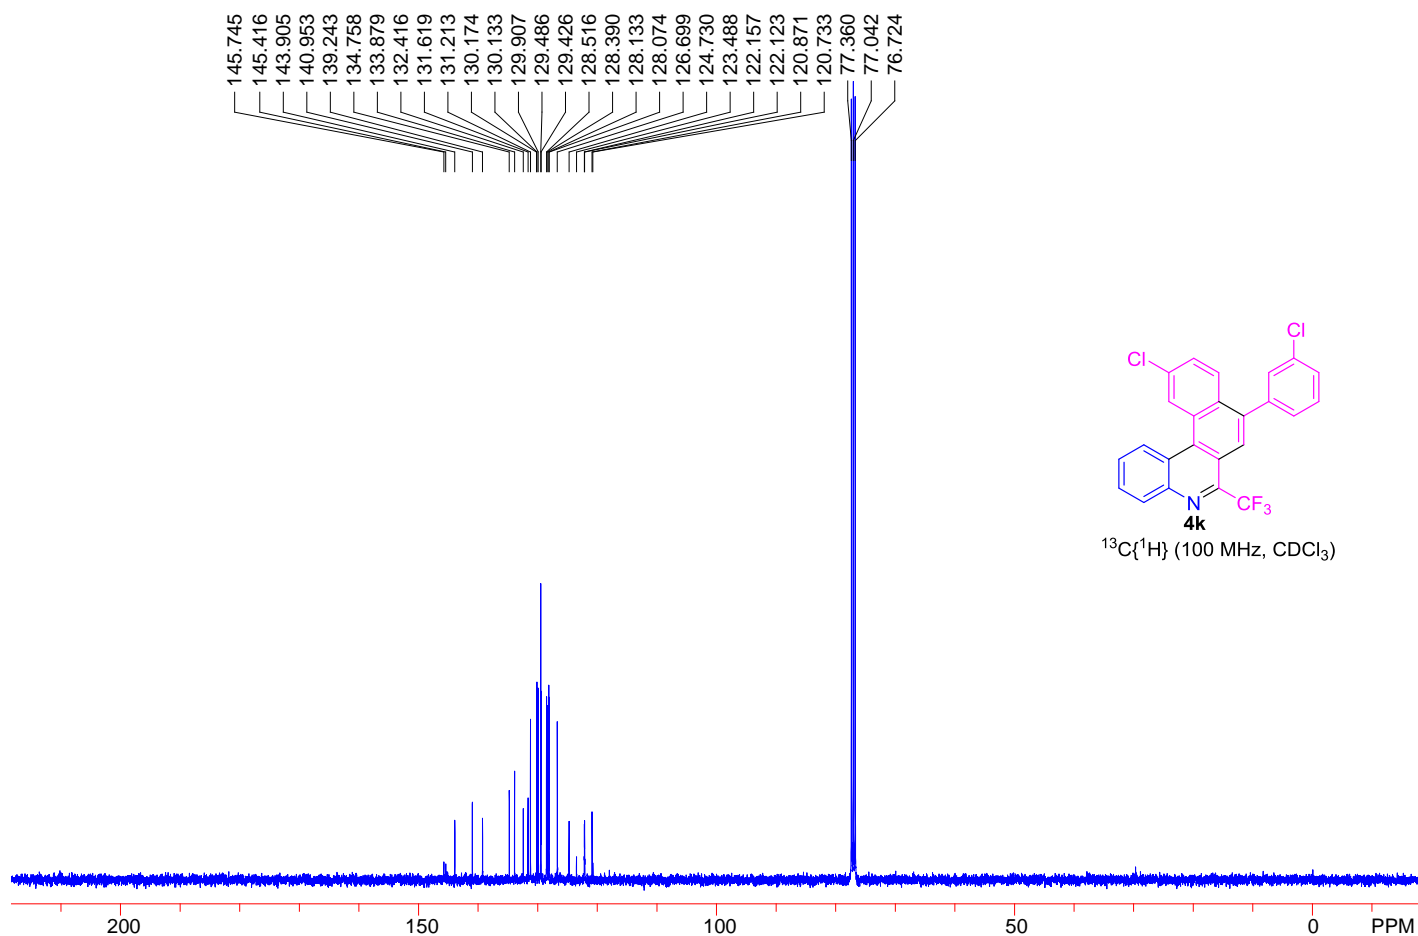

62.466  
62.473

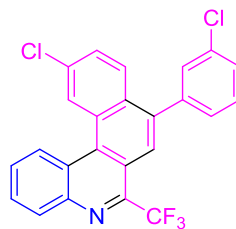

**4k**  
<sup>19</sup>F NMR (376 MHz, CDCl<sub>3</sub>)

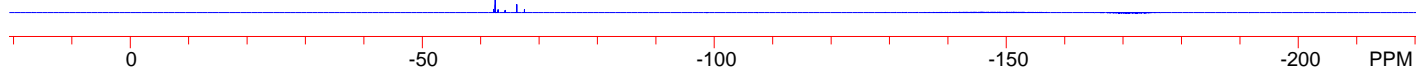

9.050  
9.029  
8.915  
8.896  
8.829  
8.425  
8.408  
8.406  
8.121  
8.117  
7.912  
7.909  
7.894  
7.891  
7.875  
7.871  
7.866  
7.849  
7.846  
7.832  
7.828  
7.814  
7.812  
7.795  
7.793  
7.696  
7.676  
7.656  
7.431  
7.427  
7.422  
7.417  
7.414  
7.396  
7.375  
7.349  
7.345  
7.341  
7.331  
7.328  
7.324  
7.255

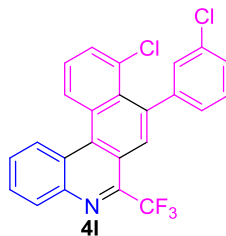

$^1\text{H NMR}$  (400 MHz,  $\text{CDCl}_3$ )

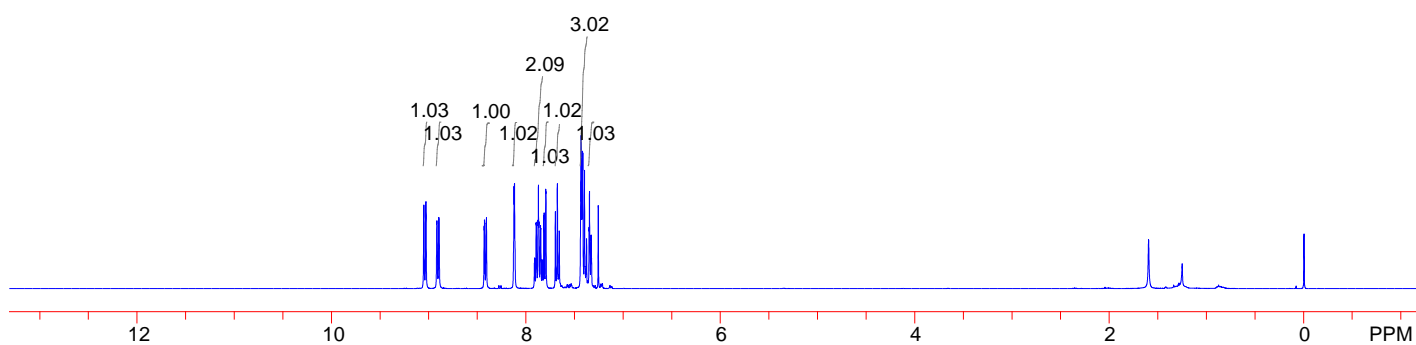

145.450  
145.122  
144.268  
144.154  
137.778  
133.929  
133.838  
132.345  
132.312  
131.721  
131.050  
130.131  
129.507  
129.274  
129.235  
129.153  
128.526  
127.610  
127.403  
127.134  
125.892  
125.861  
125.828  
125.792  
124.719  
123.402  
120.648  
119.845  
77.364  
77.047  
76.729

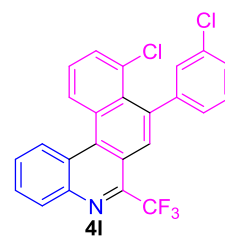

$^{13}\text{C}\{^1\text{H}\}$  (100 MHz,  $\text{CDCl}_3$ )

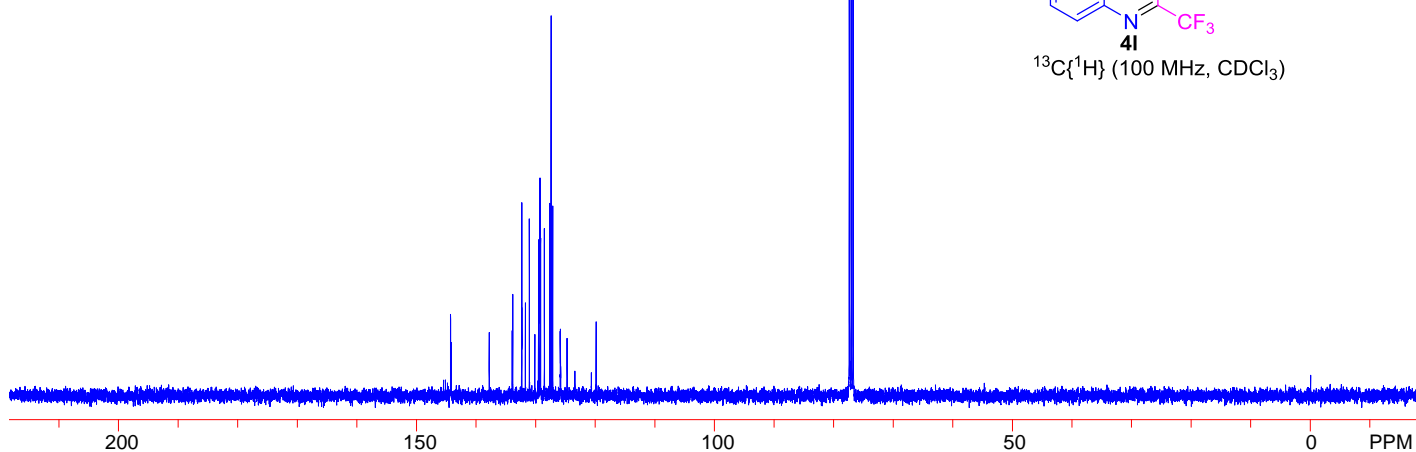

62.544

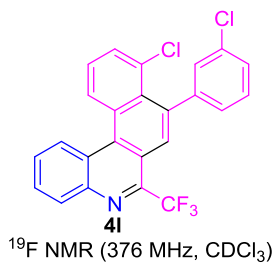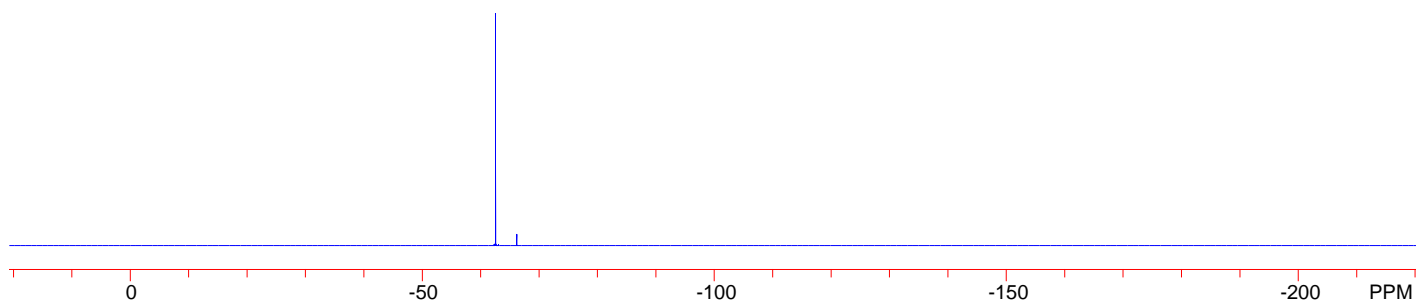



## VI. X-ray crystal structure and data of 3aa

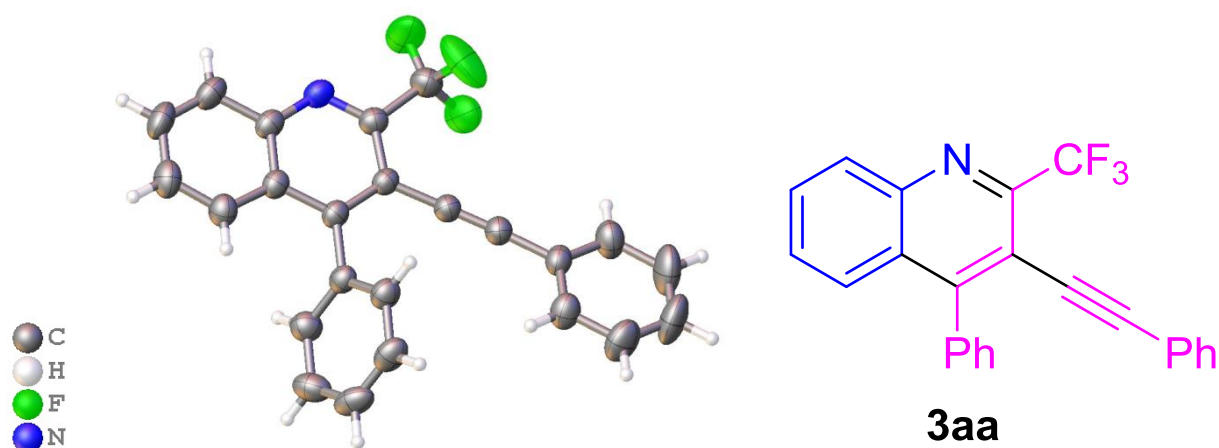

**Fig. S1** X-ray crystal structure of **3aa** with 50% ellipsoid probability

**X-ray structure determination.** Single crystals suitable for X-ray diffraction were obtained by slow evaporation of the solvent from a petroleum ether/ethyl acetate (4:1) solution of **3aa**. Crystal data collection and refinement parameters of **3aa** are summarized in Table S1. Intensity data were collected at 293 K on a SuperNova Dual diffractometer using mirror-monochromated Cu K $\alpha$  radiation,  $\lambda = 1.54184 \text{ \AA}$ . The data were corrected for decay, Lorentz, and polarization effects as well as absorption and beam corrections based on the multi-scan technique. Using Olex2, the structure was solved with the SHELXS structure solution program using Direct Methods and refined with the SHELXL refinement package using Least Squares minimisation. Nonhydrogen atoms were refined with anisotropic displacement parameters. The H-atoms were either located or calculated and subsequently treated with a riding model.

**Table S1** Crystallographic data and structure refinement results of **3aa**

|                   |                                                  |
|-------------------|--------------------------------------------------|
| Empirical formula | C <sub>24</sub> H <sub>14</sub> F <sub>3</sub> N |
| Formula weight    | 373.36                                           |
| Temp, K           | 293(2)                                           |
| Crystal system    | monoclinic                                       |
| Space group       | P2 <sub>1</sub> /c                               |
| <i>a</i> , Å      | 10.8004(3)                                       |
| <i>b</i> , Å      | 7.5870(2)                                        |
| <i>c</i> , Å      | 22.5090(5)                                       |

|                                           |                |
|-------------------------------------------|----------------|
| $\alpha$ (°)                              | 90             |
| $\beta$ (°)                               | 94.210(2)      |
| $\gamma$ (°)                              | 90             |
| Volume, Å <sup>3</sup>                    | 1839.47(8)     |
| Z                                         | 4              |
| $\rho_{\text{calc}}$ , g cm <sup>-3</sup> | 1.348          |
| $\lambda$ , Å                             | 1.54184        |
| $\mu$ , mm <sup>-1</sup>                  | 0.834          |
| No. of data collected                     | 7021           |
| No. of unique data                        | 3504           |
| $R_{\text{int}}$                          | 0.0225         |
| Goodness-of-fit on $F^2$                  | 1.042          |
| $R_1$ , $wR_2$ ( $I > 2\sigma(I)$ )       | 0.0605, 0.1599 |
| $R_1$ , $wR_2$ (all data)                 | 0.0688, 0.1699 |

## VII. Cell antiproliferative activity assay

Cell antiproliferative activity against A549 or HeLa cell was evaluated by the CCK-8 method. Dilute A549 or HeLa cell suspensions in growth medium to desired density and 100  $\mu\text{L}$  were taken to 96-well plate. The test compounds with different concentration gradients were prepared. Add 100  $\mu\text{L}$  culture medium containing compounds into 96-well plate according to the plate map. Final DMSO concentration in each well was below 0.1%. Then the cell was incubated at 37  $^{\circ}\text{C}$ , 5%  $\text{CO}_2$  for 72 h. Equilibrate the assay plate to room temperature before measurement. Add 20  $\mu\text{L}$  of CCK-8 into each well. Mix contents for 2 minutes on an orbital shaker to induce cell lysis. Incubate at 37  $^{\circ}\text{C}$  and 5%  $\text{CO}_2$  for 2 hours, and then the plates were recorded by measuring absorbance at 450 nm using an EnVision Multilabel Reader (PerkinElmer). The  $\text{IC}_{50}$  values were calculated using GraphPad Prism 6.0 software and determined by the concentration causing a half-maximal percent activity. All assays were conducted with two parallel samples and two repetitions, and 5-fluorouracil was used as the positive control.

Cell antiproliferative activity against Ramos cell was evaluated by the CellTiter-Glo (Promega, USA) assay. Dilute Ramos cell suspensions in growth medium to desired density and 100  $\mu\text{L}$  were taken to 96-well plate. The test compounds with different concentration gradients were prepared. Add 100  $\mu\text{L}$  culture medium containing compounds into 96-well plate according to the plate map. Final DMSO concentration in each well was below 0.1%. Then the cell was incubated at 37  $^{\circ}\text{C}$ , 5%  $\text{CO}_2$  for 72 h. Equilibrate the assay plate to room temperature before measurement. Add 20  $\mu\text{L}$  of CellTiter-Glo<sup>®</sup> Reagent into each well. Mix contents for 2 minutes on an orbital shaker to induce cell lysis. Incubate at room temperature for 10 minutes to stabilize luminescent signal. Record luminescence using EnVision Multilabel Reader (PerkinElmer). Cell viability (CV%) was calculated relative to vehicle (DMSO) treated control wells using following formula: Cell viability(%) =  $(\text{RLU compound} - \text{RLU blank}) / (\text{RLU control} - \text{RLU blank}) * 100\%$ . The  $\text{IC}_{50}$  values were calculated using GraphPad Prism 6.0 software, fitting to a 4-parameter equation to generate concentration response curves. All assays were conducted with two parallel samples and two repetitions, and 5-fluorouracil was used as the positive control.

## VIII. References

- (1) G. Brasche and S. L. Buchwald, C–H Functionalization/C–N Bond Formation: Copper-Catalyzed Synthesis of Benzimidazoles from Amidines, *Angew. Chem. Int. Ed.*, 2008, **47**, 1932–1934.
- (2) Z. Chang, S. Zhang, Y. Wang, H.-Y. Xiong and G. Zhang, Catalyst-free Synthesis of Quinoline-Enols through Coupling between Heterocyclic *N*-Oxides and CF<sub>3</sub>-Ynones Under Mild Conditions, *Org. Chem. Front.*, 2022, **9**, 6200–6204.
- (3) J. Wang, D. Ba, M. Yang, G. Cheng and L. Wang, Regioselective Synthesis of 2,4-Diaryl-6-trifluoromethylated Pyridines through Copper-Catalyzed Cyclization of CF<sub>3</sub>-Ynones and Vinyl Azides, *J. Org. Chem.*, 2021, **86**, 6423–6432.
- (4) K. Fujita, Y. Takahashi, M. Owaki, K. Yamamoto and R. Yamaguchi, Synthesis of Five-, Six-, and Seven-Membered Ring Lactams by Cp\*Rh Complex-Catalyzed Oxidative *N*-Heterocyclization of Amino Alcohols, *Org. Lett.*, 2004, **6**, 2785–2788.
- (5) R. Molenda, S. Boldt, A. Villinger, P. Ehlers and P. Langer, Synthesis of 2-Azapyrenes and Their Photophysical and Electrochemical Properties, *J. Org. Chem.*, 2020, **85**, 12823–12842.
- (6) Z. Qi, S. Yu and X. Li, Rh(III)-Catalyzed Synthesis of *N*-Unprotected Indoles from Imidamides and Diazo Ketoesters via C–H Activation and C–C/C–N Bond Cleavage, *Org. Lett.*, 2016, **18**, 700–703.
